# Supplementary material for: RNA sequencing reveals a diverse and dynamic repertoire of the Xenopus tropicalis transcriptome over development
Source: HighWire-hosted journal article supplement (doi:10.1101/gr.141424.112), 2012-09-07
Supplement: GENOME_2012_141424.zip [file File S3 - GO Analysis of 8 clusters.xlsx]

## Sheet: Cluster 1
GO Term (Biological Process)	Actual number of genes	Expected number of genes	P-value
protein amino acid phosphorylation	29	11.75	1.01e-05
protein modification process	43	26.14	0.00098
meiosis	8	2.65	0.0057
tRNA metabolic process	5	1.65	0.0265
DNA repair	9	4.47	0.0377
DNA replication	8	4.14	0.0585
DNA metabolic process	14	8.93	0.068
intracellular signaling cascade	26	19.35	0.0798
mitosis	15	10.09	0.0852
chromosome segregation	7	3.8	0.0902
phospholipid metabolic process	6	3.14	0.0981

## Sheet: Cluster 2
GO Term (Biological Process)	Actual number of genes	Expected number of genes	P-value
mRNA processing	25	9.54	1.59e-05
nuclear mRNA splicing, via spliceosome	19	6.42	3.42e-05
RNA metabolic process	29	13.82	0.000173
nucleobase, nucleoside, nucleotide and nucleic acid metabolic process	91	65.63	0.00053
DNA metabolic process	18	8.88	0.00416
transcription from RNA polymerase II promoter	39	28.62	0.0312
transcription	39	28.62	0.0312
calcium-mediated signaling	6	2.47	0.0393
cellular amino acid biosynthetic process	6	2.63	0.0507
nuclear transport	6	2.96	0.0792
reproduction	8	4.61	0.0942
protein amino acid glycosylation	9	5.43	0.098

## Sheet: Cluster 3
GO Term (Biological Process)	Actual number of genes	Expected number of genes	P-value
cellular process	45	33.07	0.0132
protein targeting	5	1.47	0.0165
signal transduction	27	18.32	0.0243
cell communication	28	19.66	0.0324
intracellular signaling cascade	13	7.47	0.0371
receptor-mediated endocytosis	5	1.92	0.0441
transcription from RNA polymerase II promoter	17	11.11	0.0522
transcription	17	11.11	0.0522
DNA metabolic process	7	3.45	0.0589
nucleobase, nucleoside, nucleotide and nucleic acid metabolic process	32	25.47	0.0952

## Sheet: Cluster 4
GO Term (Biological Process)	Actual number of genes	Expected number of genes	P-value
nucleobase, nucleoside, nucleotide and nucleic acid metabolic process	83	42.76	3.14e-10
pattern specification process	18	3.54	2.68e-08
transcription from RNA polymerase II promoter	43	18.65	2.34e-07
transcription	43	18.65	2.34e-07
regulation of transcription from RNA polymerase II promoter	34	13.29	5.34e-07
anterior/posterior axis specification	12	2.04	1.34e-06
nervous system development	20	6.11	4.41e-06
system development	29	11.68	7.07e-06
RNA metabolic process	23	9	4.34e-05
segment specification	11	2.47	4.7e-05
ectoderm development	20	7.5	7.9e-05
developmental process	43	25.19	0.000345
embryonic development	11	3.11	0.000345
rRNA metabolic process	6	0.96	0.000471
mRNA processing	16	6.22	0.0006
mesoderm development	20	9	0.000811
nuclear mRNA splicing, via spliceosome	12	4.18	0.00116
cell surface receptor linked signal transduction	21	11.58	0.00656
establishment or maintenance of chromatin architecture	6	2.14	0.0217
visual perception	7	2.79	0.0231
sensory perception	8	3.54	0.0271
organelle organization	6	2.57	0.046
signal transduction	40	30.76	0.0489
primary metabolic process	122	109	0.0495
neurological system process	16	10.5	0.0639
cell communication	41	33.01	0.0823
metabolic process	128	117.57	0.0951

## Sheet: Cluster 5
GO Term (Biological Process)	Actual number of genes	Expected number of genes	P-value
lipid transport	8	2.33	0.00271
ectoderm development	18	10.89	0.0275
segment specification	8	3.58	0.0292
transport	66	52.76	0.0307
regulation of transcription from RNA polymerase II promoter	28	19.3	0.0324
protein transport	45	34.55	0.0407
intracellular protein transport	45	34.55	0.0407
lipid metabolic process	25	17.59	0.0508
cellular process	94	80.62	0.0516
visual perception	8	4.05	0.0528
endocytosis	16	10.27	0.0559
vesicle-mediated transport	28	20.86	0.071
cell motion	12	7.47	0.0752

## Sheet: Cluster 6
GO Term (Biological Process)	Actual number of genes	Expected number of genes	P-value
translation	46	15.04	2.57e-11
protein metabolic process	109	71.79	1.83e-06
muscle contraction	11	4.85	0.0106
protein complex assembly	8	3.23	0.0173
proteolysis	29	20.37	0.0369
ion transport	13	7.76	0.051
protein folding	12	7.44	0.0735
cation transport	11	6.95	0.0931

## Sheet: Cluster 7
GO Term (Biological Process)	Actual number of genes	Expected number of genes	P-value
steroid metabolic process	15	4.67	9.32e-05
generation of precursor metabolites and energy	20	7.56	9.47e-05
respiratory electron transport chain	17	6.46	0.000335
blood circulation	6	1.1	0.000934
lipid metabolic process	28	15.53	0.00209
blood coagulation	8	2.34	0.00272
response to external stimulus	8	2.34	0.00272
system process	31	18.28	0.00308
defense response to bacterium	5	1.1	0.00532
sensory perception	11	4.54	0.0066
cellular amino acid metabolic process	15	7.29	0.00729
cellular amino acid and derivative metabolic process	15	7.29	0.00729
oxidative phosphorylation	6	1.79	0.0098
visual perception	9	3.57	0.0107
proteolysis	27	17.32	0.0157
carbohydrate metabolic process	26	16.77	0.0187
cholesterol metabolic process	5	1.51	0.0188
cytokine-mediated signaling pathway	5	1.65	0.0261
oxygen and reactive oxygen species metabolic process	5	1.92	0.0455
response to stimulus	20	13.33	0.0484
cell adhesion	11	6.19	0.0489
muscle organ development	7	3.3	0.0499
muscle contraction	8	4.12	0.0575
immune system process	30	22.41	0.0641
cell surface receptor linked signal transduction	21	14.85	0.0715
skeletal system development	5	2.2	0.0717
fatty acid metabolic process	9	5.22	0.0818
purine base metabolic process	7	3.85	0.0942

## Sheet: Cluster 8
GO Term (Biological Process)	Actual number of genes	Expected number of genes	P-value
coenzyme metabolic process	8	0.87	3.16e-06
fatty acid metabolic process	11	2.07	8.31e-06
lipid metabolic process	13	6.16	0.00882
generation of precursor metabolites and energy	8	3	0.0108
respiratory electron transport chain	7	2.56	0.0149
carbohydrate metabolic process	11	6.65	0.0697
