# Supplementary material for: RNA sequencing reveals a diverse and dynamic repertoire of the Xenopus tropicalis transcriptome over development
Source: HighWire-hosted journal article supplement (doi:10.1101/gr.141424.112), 2012-09-07
Supplement: GENOME_2012_141424.zip [file File S4 - Pre-MBT genes 1.xls]

## Sheet: Pre-MBT 1
Gene	2-cell	4-cell	8-cell	16-cell	Stage 6	Stage 8	Stage 9	Stage 10	Stage 11-12	Stage 13-14	Stage 15	Stage 16-18	Stage 19	Stage 20-21	Stage 22-23	Stage 24-26	Stage 28	Stage 31-32	Stage 33-34	Stage 38-39	Stage 40	Stage 41-42	Stage 44-45	Zebrafish	GO terms
LOC100170544	139.422	189.912	231.133	305.518	415.509	532.364	489.246	263.148	130.528	91.7292	85.944	88.0738	77.962	59.1895	55.9682	42.4997	39.1635	42.3705	37.1496	34.4561	30.8459	26.872	22.7055
oct25	120.699	155.098	172.089	215.115	242.054	321.742	1087.82	2253.88	1110.96	401.211	14.4604	14.4335	7.09871	4.53179	3.89561	2.22529	1.29709	1.24669	0.388574	0.271111	0.171534	0.124521	0
znf674	105.939	134.027	142.138	163.651	237.965	389.436	360.345	201.671	76.9846	65.4515	29.1191	48.7411	31.8481	34.8507	36.423	35.7304	27.31	29.8675	29.805	22.7409	22.1833	18.9576	22.0673
lsm12	75.0503	101.698	113.883	135.62	180.433	215.35	204.96	239.345	249.918	171.959	122.186	132.61	153.036	141.908	154.814	123.943	114.284	86.1582	89.9986	83.337	88.0261	74.611	65.348
ryk	65.4115	83.3502	105.545	132.574	171.937	262.661	232.394	156.625	115.328	114.099	63.0835	63.8391	62.8444	53.3122	53.4451	46.1793	46.9582	50.8925	45.4275	49.734	48.5035	45.7048	49.5233		Cell cycle	Cell surface receptor linked signal transduction	Intracellular signaling cascade	Negative regulation of apoptosis
fip1l1	69.9868	77.4735	96.2857	105.492	148.963	212.636	223.159	231.249	180.338	139.718	95.7055	103.938	110.433	134.38	149.299	150.324	149.275	142.178	124.101	122.315	106.811	90.7572	96.3621
c12orf41	68.5695	78.7727	87.525	101.795	140.5	227.14	216.605	162.886	110.902	93.4746	76.6808	68.6884	55.2534	57.853	59.4312	53.4071	45.6044	31.5829	29.5635	29.6412	27.5826	25.1345	27.8442
ddx56	66.6214	75.0592	87.19	107.828	147.683	201.105	205.183	169.277	92.5282	52.3656	54.6767	53.9543	61.1853	76.1763	70.569	65.5064	70.1169	58.5547	48.3353	33.5484	31.6156	26.3594	21.8336
manf	52.7291	66.7197	77.8235	95.7787	120.35	240.287	239.441	233.102	331.356	333.013	234.33	187.029	203.963	219.227	217.345	198.929	235.631	180.51	174.899	154.699	160.275	140.642	148.862	manf
ccnk	56.5617	70.2016	76.534	84.8217	125.705	228.119	257.635	231.824	165.697	140.905	122.305	122.282	119.506	128.19	131.48	131.838	129.129	106.225	90.4779	85.2699	80.8145	71.9383	70.8214		Cell cycle
LOC733735	61.5679	79.6917	92.839	104.039	126.135	165.598	137.508	162.998	154.28	127.003	47.7201	48.4898	45.1514	47.1039	47.3383	46.6942	48.2499	49.1802	42.6011	57.1427	42.021	39.2041	39.492
ets2	60.5961	76.3017	78.1534	105.402	121.444	178.214	235.99	236.291	189.144	153.264	82.6635	74.2075	69.6659	55.4679	47.0526	36.0525	29.6042	26.2775	19.6412	32.8392	20.7099	23.3393	26.7511		Cell cycle	Cell surface receptor linked signal transduction	Intracellular signaling cascade
slain2	63.4953	74.9189	86.844	98.2743	129.568	160.284	161.376	115.455	46.0956	17.8673	15.9346	12.8953	15.5657	17.2395	14.7594	14.8122	14.4333	13.1392	12.3096	11.2099	11.7119	11.8002	11.683	zgc:66447
rab11fip4l	61.8982	75.9422	82.8354	94.227	126.851	170.724	156.758	130.062	120.109	107.106	80.9938	83.982	66.5338	42.6918	41.2485	30.2259	20.9776	15.5813	9.5672	11.7924	6.77486	3.14777	3.1586
slc9a3r1	36.171	42.7952	49.3943	59.7403	108.151	304.084	307.525	284.639	178.443	103.137	113.663	116.855	146.273	123.382	123.017	118.04	121.458	172.685	169.677	170.04	141.014	137.596	193.988
ccnf	42.8757	55.3593	58.6536	78.8411	112.08	228.828	289.092	371.451	236.789	164.586	142.817	104.115	105.45	110.75	108.468	86.1528	71.4638	71.1868	55.62	56.0812	52.7818	43.8359	38.4551		Cell cycle
pold2	43.454	59.3545	63.2016	91.8317	113.941	187.753	135.152	33.2196	10.8509	5.99027	10.1155	7.01494	9.04391	19.9035	19.3489	19.6575	19.9532	28.219	31.6625	26.619	29.5296	31.012	24.6926		Cell cycle
dmap1	53.0739	65.9328	79.7628	85.3304	112.06	146.206	138.235	122.405	127.606	115.583	89.0781	92.0304	85.3158	94.3814	88.0185	74.4961	69.8868	63.7656	55.4255	63.24	54.769	47.6204	42.8245	dmap1
actb	46.8678	50.8479	61.4904	67.8289	97.696	167.942	283.451	319.409	466.894	803.487	1746.58	1455.66	1772.96	2645.56	2704.81	2817.67	3016.31	2114.8	2391.2	2161.28	2404.65	2581.02	2078.02	bactin2	Cell cycle
pabpn1l	46.0197	59.12	62.3057	70.0846	104.654	124.114	84.2227	43.6385	23.6314	7.27231	1.69692	2.01826	0.606902	1.60357	0.784024	0.251657	0.0929153	0.645649	0.666601	0	0.276003	0.889092	0.835801
ruvbl2	36.8327	47.582	49.6934	66.3345	90.4944	166.706	192.605	196.845	210.945	183.543	269.26	208.332	216.555	176.389	165.168	149.257	151.866	116.826	106.421	91.9478	100.155	85.0495	78.2925
ahcy	31.3793	38.5485	40.9394	51.4589	75.766	166.148	283.121	289.627	277.129	249.08	151.95	161.399	162.97	177.197	175.925	208.483	254.182	402.801	476.221	479.026	445.595	519.547	546.973	ahcy
pcf11	37.2805	42.3547	48.2235	53.0814	77.7222	144.965	153.308	124.245	107.368	93.6006	60.2029	50.5523	65.0549	65.2635	62.9299	52.9221	62.4406	42.5451	35.2861	41.0547	31.2721	32.1456	28.2951
grk5	35.0315	35.5155	46.7854	55.9543	80.3625	126.728	133.066	172.241	191.651	181.17	73.5647	83.8204	58.0461	58.382	47.8472	36.7551	41.834	35.4523	28.7579	28.595	26.6531	26.3867	24.4722			Cell surface receptor linked signal transduction
tgif1	29.9763	37.1088	42.3568	52.5032	62.9651	151.602	128.834	63.4741	46.1833	53.9293	87.5556	79.772	87.245	87.6686	91.5175	77.3588	73.4127	63.3691	50.4006	45.187	36.7957	30.0686	25.3303
gart	38.1314	39.8364	47.0387	61.6823	76.4728	111.115	116.554	101.826	63.1697	60.7162	48.8899	50.8739	53.0583	73.1439	72.112	63.5548	59.6457	57.8543	40.5522	32.0162	27.7193	19.5637	17.0887
prep	29.1579	41.9068	43.1926	53.9867	70.8436	130.396	131.071	122.646	122.545	76.9115	28.5521	24.2542	14.3945	8.78876	6.70885	7.24879	8.5668	28.896	34.5936	65.1927	54.177	51.08	55.618	prep
mrpl45	32.8238	40.2011	47.9598	53.0432	69.0456	113.841	121.333	103.393	88.1387	44.8329	35.92	32.0281	36.8369	49.979	55.5275	55.0319	57.6001	55.5408	55.4736	49.8422	62.5947	53.4612	54.282
med7	32.4885	43.8438	51.0982	57.1315	66.3173	95.151	64.3792	65.4768	63.3488	60.6951	37.2841	36.9578	37.5247	38.9386	41.778	41.0716	36.6525	38.4014	30.8004	26.1673	30.5333	27.4757	26.3665	med7
cdk5r2	22.302	36.5594	47.0661	55.598	74.4931	102.402	97.9186	39.1761	12.7247	5.72539	2.62117	2.76063	1.5408	2.43092	2.53024	3.38933	4.95896	13.2385	24.6329	34.9422	37.1131	44.6892	47.1162		Cell cycle
rpn1	32.7575	35.1673	46.5262	52.222	70.58	97.2361	128.543	108.954	89.0157	103.258	100.005	96.8576	93.056	96.4858	90.1334	100.442	109.182	102.009	115.885	93.3149	109.659	114.282	114.47		Cell cycle
net1	28.9617	36.8699	46.4121	51.5538	73.6191	86.5669	90.7448	45.1747	26.9846	24.2769	32.5881	27.1382	29.251	34.0105	30.3279	29.7864	29.1783	16.3388	15.1274	14.0397	15.806	15.7171	12.2311		Cell cycle
LOC100158552	23.2264	25.8464	32.6977	36.9022	58.6629	141.985	158.411	91.212	51.2689	48.2932	40.9881	33.9059	36.3473	41.9477	39.8749	35.8397	34.3246	30.9034	27.4475	27.9976	28.6403	24.8064	23.0165	zgc:109953
mrps24	32.1347	32.6077	37.6556	45.2952	67.8876	101.723	77.5521	60.0565	66.7237	57.0919	57.7967	49.4704	86.8764	113.447	121.523	156.169	169.501	201.346	229.252	179.06	246.015	234.593	253.338	mrps24
exosc9	24.8127	36.5016	40.6681	47.9929	68.0199	90.0237	87.3295	75.9899	46.3234	21.8777	21.2127	14.0666	22.1662	30.4415	31.7722	30.6157	36.0872	24.9461	23.3428	14.9478	23.116	17.4904	10.9331	exosc9
lpin1	22.2105	30.3232	35.4003	38.3931	58.7408	117.011	102.669	38.7598	14.2492	4.35221	1.49404	1.67852	0.928542	1.8327	2.12536	2.74053	3.73842	5.9022	7.58706	12.2392	14.7576	16.5066	20.9704
gpi	27.6649	30.7848	31.1764	38.66	59.221	89.2235	87.7142	47.9287	27.489	9.64985	6.89377	4.92073	6.24566	8.96165	9.07371	24.655	41.2114	36.5664	42.9032	46.5966	47.4077	69.747	63.0252
ccnl2	27.6227	30.5578	38.9757	41.0381	56.6184	77.0197	33.0658	36.4706	54.9852	55.9698	41.706	35.9013	38.2517	40.4952	39.3376	43.9078	44.2233	31.259	32.737	39.7724	33.9535	30.1267	28.1899	ccnl1	Cell cycle
ddx6	24.9544	28.5817	32.7593	40.2521	55.306	84.8269	90.4381	49.8081	38.4286	36.3994	31.927	39.073	39.1729	45.5313	39.0629	34.2183	36.2594	39.2668	37.9449	39.4681	35.9651	37.8743	33.7446
med4	25.4809	36.2624	38.4608	43.8727	55.9465	65.1501	37.2092	23.9152	25.5515	27.0513	16.236	16.4569	17.7305	22.6661	21.0979	19.0624	21.773	13.4276	13.2759	13.5618	11.8773	10.4225	10.1307
zc3hc1	26.2591	30.2082	34.5211	45.2705	56.3437	71.863	73.3792	68.49	63.3295	62.663	62.0274	53.9464	55.1473	56.5867	51.2177	49.9452	48.6133	42.4244	37.7606	24.9121	31.229	26.3846	19.0448
arih2	15.1189	24.0856	25.327	28.8155	49.7377	118.691	136.648	117.915	66.3391	34.2462	44.9527	43.0328	49.7497	59.542	59.5277	52.4577	52.8155	56.5391	53.5184	44.3841	48.1069	44.3019	43.3984				Intracellular signaling cascade
phf12	26.195	33.1101	39.9437	47.6617	52.6053	57.395	77.1412	61.818	49.2865	45.5185	29.2735	27.1377	24.8948	26.1261	22.2563	23.0242	20.908	20.4872	18.3909	17.9875	16.8706	16.2222	14.393
ptpn21	22.9112	27.8477	34.5685	42.3058	53.704	70.8909	63.4284	27.7625	11.0141	7.30334	8.16356	11.3564	8.61953	10.7071	8.6183	7.17691	7.99135	6.59244	6.83059	6.9394	7.36463	8.9453	8.71521		Cell cycle	Cell surface receptor linked signal transduction	Intracellular signaling cascade
rab11b.1	26.0146	29.1835	35.8946	38.7349	53.9501	64.6367	76.6731	57.6997	39.5014	28.1182	33.0688	26.0978	34.2375	51.2864	47.7983	55.6881	56.6023	42.054	49.4939	40.2555	47.0212	40.0008	38.2733		Cell cycle	Cell surface receptor linked signal transduction	Intracellular signaling cascade
mthfd1	20.4943	25.9834	28.4807	29.5085	47.1087	95.2251	138.02	121.699	124.865	110.721	130.428	156.193	161.41	198.032	190.857	205.358	203.831	180.234	161.46	113.289	102.363	75.098	88.8536
ipo9	24.9596	29.1179	33.2753	40.9809	50.419	66.9282	66.6773	49.4427	22.4005	9.38973	9.43606	7.79349	10.0065	15.1388	14.4817	16.05	19.178	18.1611	19.458	12.5779	16.9591	18.3404	12.7215	ipo9
idi1	20.679	24.5312	32.0563	35.17	50.0218	79.1198	86.3848	76.6263	49.5333	34.1918	20.9603	18.8862	18.2667	27.9214	29.2995	32.753	34.6234	43.6246	55.6017	64.9428	70.3363	84.6579	97.7803
lrrcc1	23.1435	29.6748	33.5874	34.5317	46.8609	60.415	60.1932	47.7838	29.0061	13.95	8.41685	8.15195	7.82584	6.36236	5.87062	5.77666	4.86416	5.04795	5.16526	4.34354	4.37119	3.72412	4.26083		Cell cycle
mtx1	18.7023	19.1372	32.3742	34.7257	52.7023	65.2812	69.8143	73.5458	85.9746	66.9114	81.9631	75.1464	94.391	86.0824	80.1929	76.5464	89.4486	106.21	111.304	106.276	109.496	99.4818	91.064	mtx1b
dip2a	18.7083	21.9336	24.2255	29.3951	40.7336	84.736	91.9903	56.5225	24.4764	14.1538	30.4954	34.9395	35.7671	31.4578	30.5522	26.4252	30.8418	47.2101	42.6686	32.5091	30.4056	29.2999	25.5328	dip2ba
ascc2	16.9963	21.1237	26.5484	30.3689	42.6935	81.859	84.7875	84.0821	51.1463	24.6125	15.8438	12.0596	13.4598	15.3194	17.4338	18.3416	19.1771	24.8041	22.5012	22.3256	22.3543	23.7727	23.6201
xpr1	19.2552	21.8145	28.5221	35.3299	43.2297	69.0273	72.0794	50.4326	30.3317	17.3203	12.2482	13.3221	12.953	17.5623	12.976	13.3612	16.2501	18.8214	24.8842	28.0384	25.982	34.7722	35.7007			Cell surface receptor linked signal transduction
polr1d.1	21.8993	28.4365	32.5846	35.4819	45.6312	52.6075	51.7827	45.5883	29.4934	22.6159	22.6836	24.8778	19.2766	22.4703	24.8072	17.1305	17.8792	15.6204	16.7579	15.949	16.7316	16.9411	13.8676
sept11	20.1049	24.6075	31.436	35.0962	44.8016	54.4805	49.1993	48.3946	41.4773	30.4334	15.5852	14.1268	13.0581	12.6237	11.8671	13.2418	13.9773	20.0288	20.7535	11.1201	16.2494	16.2956	12.9697		Cell cycle
trmt61a	14.7948	19.2618	22.5087	32.0449	41.5907	75.3551	50.0023	47.9699	32.0571	21.6755	29.2633	18.0159	34.6092	60.9269	64.5359	53.9676	60.3198	47.5801	40.206	26.2197	32.7615	23.6638	24.599	trmt61a
rdh13	16.6778	19.3738	24.5702	29.3161	42.7204	72.5573	37.1248	7.1042	1.97238	1.23689	6.2231	4.15373	8.9862	16.6939	17.1685	18.4143	20.2205	17.8277	20.6559	16.424	19.4193	18.187	18.119
dpp8	11.0609	16.4168	20.8728	29.1394	44.4982	78.46	83.9445	58.4958	43.9318	38.797	34.9425	30.1611	35.9677	47.8278	43.6179	36.9691	44.5764	36.9743	35.8309	31.0514	36.7857	31.7437	28.9178
idh3g	18.7277	26.587	29.4899	31.291	41.197	49.9952	52.6587	39.6709	27.0751	14.4441	14.4725	10.3179	11.3893	9.78712	11.165	15.2235	24.2054	48.6802	68.8712	64.405	71.1291	109.053	102.654	idh3g
cradd.1	19.9123	23.3894	27.1846	34.8548	42.1558	46.8375	43.9305	33.2641	15.6851	13.3128	10.1791	10.4392	10.0915	12.1961	12.3202	12.638	11.9417	11.6495	13.9284	11.8377	10.9117	14.8004	13.6454
rnf139	13.7533	14.5968	20.1607	21.8667	33.1163	86.1515	94.4931	71.6355	63.2102	50.3523	41.5229	31.9337	39.5813	42.2414	51.8411	47.4126	49.2389	42.5927	42.3996	36.3455	40.4077	42.3131	41.8581
tesk2	19.7481	21.9393	21.9648	24.9474	42.0591	47.1317	39.9932	13.3765	6.05826	3.54771	1.18166	3.91598	3.02865	2.932	3.37812	3.74732	3.49536	1.54192	3.04697	2.24328	2.21086	2.41492	2.83944		Cell cycle	Cell surface receptor linked signal transduction	Intracellular signaling cascade	Negative regulation of apoptosis	Phosphate metabolism
nif	15.9374	21.1567	24.2195	27.3438	36.3803	50.348	74.1806	65.443	44.543	29.0729	18.9733	13.8356	22.2611	37.3931	46.7851	79.7308	107.441	145.579	150.036	193.595	145.657	164.09	182.752
cfl1	13.7085	14.1816	20.0295	30.6128	37.4558	53.8503	86.0424	55.1022	44.9213	42.5241	61.2017	41.2331	55.1987	109.843	111.853	141.087	202.042	99.6373	118.796	103.262	127.862	131.444	126.809	cfl1
agps	15.8202	16.1121	19.1083	28.7492	32.2084	56.9759	65.2975	63.3482	53.1789	36.5612	19.5982	20.9239	18.7416	23.3835	23.2989	29.1457	32.237	34.4188	33.6513	40.4291	30.956	32.5275	36.0018
c3orf37	17.5964	19.5521	22.9655	27.156	35.4711	45.6007	45.3692	22.8485	8.43289	3.81473	3.20624	3.49875	3.11302	5.18812	3.96796	3.56004	3.30465	3.87917	2.89845	4.40822	3.05089	5.3244	6.40913
cdc14b	8.78122	12.3535	14.9225	20.5652	37.4509	71.9691	68.7008	29.1059	13.2073	9.94118	10.8005	8.91134	10.2048	11.6157	10.2773	9.00048	8.05792	7.15302	6.44144	6.94951	5.41419	5.40425	5.88411	cdc14b	Cell cycle				Phosphate metabolism
casp7	14.3379	17.8361	20.5867	22.681	34.4138	50.591	51.0098	59.4055	46.2165	28.1363	20.2547	15.2139	11.9909	11.875	9.71116	18.3407	20.637	37.8223	52.7607	51.0603	100.15	118.949	102.817
copz1	13.8045	13.817	23.3918	29.1633	34.2661	40.3242	52.2998	52.6156	58.8639	56.4427	74.3201	62.2669	67.2074	63.969	57.7874	56.3935	65.1113	70.2698	76.9955	53.0811	72.8583	80.137	71.6795	copz1
pak4	11.7276	16.6851	18.2016	21.6503	29.3374	45.8056	43.6687	23.1061	15.4855	14.3627	13.6046	16.9253	15.0901	16.4333	12.8808	11.1463	11.0851	11.1993	11.9235	9.8686	8.9453	10.1513	10.4948						Phosphate metabolism
shq1	13.9008	15.9757	19.076	20.4327	29.4395	44.4649	66.2998	49.4755	27.226	15.3436	15.8198	12.8412	16.1021	21.5093	20.4805	15.5718	14.9922	11.5016	6.7571	6.24984	6.69269	5.22776	2.70061
fem1b	11.4487	15.9257	19.4094	22.3474	30.035	43.9066	40.0008	19.267	10.1295	7.96749	5.22043	6.02051	6.36503	8.09947	6.18582	6.94904	7.57644	7.19381	6.67918	6.68324	6.76815	7.03402	6.8737
scrn2	13.3149	15.7689	16.9997	18.2479	28.3816	49.8203	51.5377	31.0472	24.5314	12.3429	7.03353	4.82763	4.37557	2.76026	1.43057	1.68079	1.65478	2.61484	2.02516	2.99576	1.56496	3.96316	3.37826
rpa1	9.71597	14.0903	16.5604	20.4149	27.1157	54.042	46.4279	28.1127	27.0013	18.0584	34.021	28.1505	33.1263	41.1888	39.6174	34.4379	37.8837	44.4041	36.468	33.7269	27.6424	29.5555	24.1263		Cell cycle	Cell surface receptor linked signal transduction	Intracellular signaling cascade
btbd17	8.73763	12.1583	14.3504	19.0196	30.5467	52.2249	91.1042	70.3803	54.133	34.1042	14.6602	13.1164	6.862	5.89701	5.65158	4.42925	3.42039	1.19263	0.323341	0.125614	0.475865	0.632979	0.134593
xiap	9.74482	16.175	17.2454	24.3287	28.5599	40.9117	30.7552	19.1076	9.05577	8.70464	4.08256	6.92698	4.86827	7.87158	8.84182	7.83595	6.4213	6.37971	5.82509	5.32407	5.502	5.44967	5.10376
c22orf32	11.0147	17.3044	19.0081	20.5634	29.0106	39.23	23.1227	18.8927	18.8822	21.8371	28.9896	33.2655	40.1266	67.0917	64.4691	88.802	106.185	107.09	141.308	170.707	183.886	187.104	241.328
cyb5b	13.6044	15.0659	17.8826	20.2546	30.4187	36.856	37.0258	35.8742	25.1968	14.6392	14.2996	12.6028	16.5091	24.8576	24.6269	20.394	23.7554	27.2432	28.8258	26.0073	31.3034	31.552	28.8137
c2orf42	12.1303	14.2118	15.673	19.9835	25.1691	44.4057	37.9402	25.742	12.9493	8.74511	8.08889	10.9334	11.1755	15.8396	14.4256	12.7209	13.1636	11.8516	11.5097	11.9214	11.4822	11.4991	12.6184	C2orf42
spats2	8.2445	12.1577	12.6502	15.8524	19.0868	60.7693	89.8135	58.3803	28.3415	25.6034	27.5783	33.5996	28.0669	26.9882	25.556	23.674	21.7564	21.8537	19.8384	20.7333	20.1935	18.1733	15.5902
selo	12.6263	15.7693	18.2651	22.1591	25.4588	32.3767	29.8579	23.1115	13.9323	7.7715	4.86582	4.6983	5.0327	7.35819	7.05941	6.78933	7.30278	7.55151	7.5803	8.63073	7.01363	7.24498	6.85063
syngr2	11.6835	16.3654	18.886	23.0168	24.7687	30.8194	34.1638	31.7323	42.454	49.3268	69.2364	62.0324	72.0669	69.5176	61.4561	59.4415	56.8272	41.0004	40.5314	31.6051	35.6116	36.6657	43.7112
map2k6	12.2515	14.4758	15.6335	23.4712	27.3255	32.0651	39.2446	69.6169	119.629	133.885	100.869	115.213	89.8809	82.1599	68.6806	55.8566	56.2234	49.8915	49.1579	44.4148	41.5276	40.1984	35.4971						Phosphate metabolism
aen	9.3791	11.7185	13.523	18.5415	27.1125	44.3587	43.5007	28.2384	11.4069	3.78827	5.19081	2.83124	4.42376	12.0542	10.3999	9.31095	11.1567	8.7446	6.40628	4.45218	3.85651	4.1767	3.31909
ptpn12	9.1381	13.2831	16.4491	18.5998	25.0716	41.6395	43.2535	24.2933	10.3718	6.21382	10.3485	11.9048	11.4951	12.4831	10.5337	9.84826	9.22524	9.10487	8.45209	8.97217	7.75515	8.65803	7.88219		Cell cycle	Cell surface receptor linked signal transduction	Intracellular signaling cascade
hat1	10.969	15.1559	15.2836	22.0453	22.65	29.7281	28.194	11.8293	9.38892	6.48433	6.50204	6.41969	9.81607	15.5239	13.5861	12.6781	17.5721	17.9679	21.401	19.4021	22.5463	20.767	20.9314	hat1
rhou	5.9149	6.34644	10.0712	11.4048	20.3004	61.3079	40.8723	30.7591	23.1759	35.058	36.852	31.7428	29.9251	32.7218	29.2787	25.376	22.4569	16.6983	13.3576	10.6795	10.7858	10.035	12.8333			Cell surface receptor linked signal transduction	Intracellular signaling cascade
nfrkb	9.6536	10.1576	14.0249	16.2182	24.1977	39.2453	44.0319	38.1191	26.7704	26.3821	16.0736	12.9015	13.0472	14.4103	13.5205	14.8917	14.8411	12.6911	14.1969	10.5645	12.2908	11.7362	11.3797	wu:fi86h10
fbxo21	10.3561	13.364	15.1202	17.9023	23.7095	30.9677	24.4225	14.5911	4.92746	2.36782	2.54984	1.88686	2.11477	3.81089	4.63874	5.08717	5.23581	7.9185	10.4789	10.2426	8.29379	10.5351	7.52947
leprel4	9.49513	11.2965	13.616	16.0063	21.3509	36.8532	61.9623	43.7778	39.2461	34.8012	53.3141	53.731	43.8319	41.2854	41.9716	35.3735	32.2249	39.4536	42.3184	44.835	47.4109	77.9367	49.8767
rfc2	8.14199	10.6067	13.8265	20.4744	23.1013	29.9912	32.4014	24.6512	17.2046	6.40784	13.1512	6.57046	11.1116	14.8277	17.5554	17.8475	21.771	13.5016	14.9724	4.68786	13.9051	14.9679	6.35591	rfc2	Cell cycle
c19orf10	4.96137	13.5889	15.134	17.7452	23.8634	29.924	16.702	14.156	9.23083	7.4612	7.98745	13.1526	16.9715	13.9578	23.3807	25.9605	26.1971	39.1721	49.742	27.1295	52.9131	68.6622	57.5605
plekhg4	8.70384	10.4029	12.9557	15.8217	22.1408	34.9133	35.979	16.2793	12.4261	10.5628	10.464	7.82867	8.2786	9.76949	9.46572	8.46499	9.21256	8.66707	7.27072	6.02938	6.56037	6.78658	5.33942			Cell surface receptor linked signal transduction	Intracellular signaling cascade
kidins220	7.81812	8.55041	11.9271	12.7335	21.8502	42.0403	49.4058	32.2523	17.0425	11.892	12.1818	14.0018	15.6657	15.9908	14.2369	14.7635	16.7471	18.009	24.1241	26.0109	26.2869	31.9578	33.5926
cand1	9.7502	11.3802	12.2519	16.4474	20.592	31.1354	39.3083	28.0855	15.0001	7.04571	6.41426	5.19849	8.01338	13.7635	12.9219	15.2584	18.1836	15.7665	15.9206	13.2107	15.1867	13.9232	13.4209	cand1
rgs19	8.84944	10.8477	12.8671	15.0996	18.7834	29.0279	34.1749	34.5743	35.1378	31.4119	27.6894	36.7916	27.9549	23.7341	23.5261	21.0877	21.982	17.7455	17.0933	12.0576	16.145	14.3616	10.2762			Cell surface receptor linked signal transduction
vmp1	8.54431	12.1332	13.8732	15.77	20.6164	22.8283	27.565	25.5346	19.819	12.8187	6.60527	5.21373	6.77261	9.09223	8.25015	9.13844	9.96365	12.7419	14.6891	10.721	11.7512	11.1865	9.75475
eif2a	9.58937	12.2813	12.8161	14.8106	19.9619	21.7662	15.124	14.9314	12.1323	14.6097	17.7992	19.11	28.3254	43.4577	47.7003	46.5789	48.9769	40.7228	36.5485	36.3421	37.4711	33.5312	36.3963
gpr160	8.74612	11.3524	12.7053	16.5456	17.5372	24.1885	20.1294	15.0099	9.69566	10.404	6.52681	11.2849	8.30721	11.4436	11.361	11.8812	9.78095	7.34198	6.36599	10.1727	5.84403	6.93841	13.413
rela	8.68347	9.67572	11.4524	13.0567	22.041	24.9266	21.3813	14.833	10.2041	10.577	9.99002	11.7825	12.0189	14.9595	11.9259	10.1086	11.1011	8.3022	7.30973	6.08822	6.14444	6.87579	6.16145		Cell cycle		Intracellular signaling cascade	Negative regulation of apoptosis
sesn3	10.297	10.9334	10.9366	12.1789	21.1534	23.7298	26.143	15.7867	13.5218	26.4798	21.3737	36.0981	19.0845	28.3355	23.3888	26.4012	29.8153	25.2121	24.7669	22.0566	23.5817	30.0705	31.8002		Cell cycle
lcmt1	5.8535	6.98333	11.9427	13.8918	19.9585	29.3932	21.5811	25.0091	22.0378	15.5291	3.86005	4.40262	3.8973	3.74618	3.30462	4.47849	4.93281	10.7883	14.0636	16.9773	20.1899	25.2853	31.3098
LOC100127651	9.09808	10.2151	11.2555	13.2083	18.3696	24.4577	30.3423	20.7963	11.7915	6.23843	13.4284	11.5679	11.8304	12.7053	13.4282	16.6439	17.5308	20.9566	22.6673	20.292	23.589	28.5808	26.9809
prdm10	8.41722	10.6443	12.4412	15.0051	18.2386	21.8114	19.4555	10.6623	11.2675	13.0384	10.2837	7.88408	8.72467	6.89309	5.38787	4.58825	4.34949	3.64979	4.526	4.4733	4.19804	4.16263	3.94377	prdm10
fgfr3	8.32116	11.601	11.8302	12.9199	16.9397	24.6164	24.6585	16.8172	20.2492	21.159	42.5864	48.4779	36.1277	32.3597	29.224	29.2253	31.5062	41.2038	35.9452	35.6908	31.9516	43.0544	37.201		Cell cycle	Cell surface receptor linked signal transduction	Intracellular signaling cascade	Negative regulation of apoptosis
atp7a	7.8713	8.5587	10.7301	10.9058	18.0797	29.0376	24.6235	10.0562	4.7938	2.44522	3.83815	2.80823	4.25394	4.01846	2.82219	4.1356	4.04063	5.79754	6.43674	5.56772	6.78509	8.59407	6.48106
ier5	4.61768	5.66472	7.14224	12.4194	20.1077	32.8687	183.128	238.458	245.33	302.262	186.259	222.764	164.817	134.022	120.583	121.88	95.5033	98.3495	84.9618	97.399	67.9065	65.8096	58.5216
wdr36	5.8029	7.79768	8.32786	10.4902	18.227	29.1801	25.0198	23.569	20.7425	23.2115	21.1216	20.9059	27.2832	34.3385	29.6078	28.8421	29.3902	23.4191	20.8133	14.2365	15.5269	11.4991	10.253	wdr36
rnf31	5.83823	8.73221	8.77007	10.8788	16.1895	27.9359	32.726	25.2441	11.5975	6.9784	9.68494	7.07221	8.13797	10.03	9.54604	9.09327	9.03351	9.29887	9.73311	10.7185	13.8445	12.5257	14.8715	rnf31
cpsf2	7.51921	10.092	10.1759	12.7888	16.9743	17.5415	31.3335	31.5354	20.0177	15.4822	11.1164	10.1101	10.2549	14.3566	11.9625	13.7268	12.8176	11.6861	12.0938	10.146	8.19393	7.48139	7.91663	cpsf2
rps6ka1	5.54485	6.07539	8.66019	9.21996	16.5389	28.7333	33.9965	25.6889	14.7455	7.71268	6.65557	4.63107	5.55701	9.52731	10.6254	15.9641	15.7671	11.9332	13.7541	10.9538	13.0212	14.5815	13.0441	rps6ka1	Cell cycle	Cell surface receptor linked signal transduction	Intracellular signaling cascade
mypop	7.75575	9.40061	9.45765	10.4895	15.5372	21.8329	26.1538	33.2577	42.1176	46.7496	32.1112	27.6728	26.2222	26.074	23.234	22.3384	20.1586	20.2456	15.8989	15.5533	16.9248	14.2167	15.1408
taf5l	3.75787	7.32126	9.21721	10.105	18.0312	25.7807	29.5105	31.5078	24.7606	18.7953	18.4851	13.8974	10.5309	11.4273	13.0966	10.5324	10.7543	6.49312	5.3488	3.38827	4.70012	4.54717	3.37124	taf5l
tmem189	6.24746	8.25416	8.37353	10.0851	14.3214	26.5127	25.4322	13.8498	5.19839	1.59282	3.79058	3.87505	5.00348	10.4208	9.08371	6.47785	7.13157	6.37612	6.80471	6.63578	8.01059	9.58769	7.3825		Cell cycle
atf7	6.67633	10.2218	11.4403	12.9061	15.637	16.8758	15.5166	4.26985	2.44211	3.81489	5.66136	5.71842	5.73603	8.8129	6.45259	7.21861	7.95251	7.97606	8.80248	10.3271	9.94573	11.106	10.0217				Intracellular signaling cascade
bysl	7.4219	7.81029	10.0387	12.582	15.0194	19.0462	11.7282	14.7625	26.4136	33.9203	44.7844	52.0766	56.2922	82.1532	83.1824	68.0299	76.1198	64.4299	59.322	47.4894	45.2623	37.121	41.876	bysl
LOC100144954	4.47007	7.69913	7.92594	8.00927	14.9087	26.671	20.3511	13.8938	10.5218	2.82544	1.2826	1.6809	0.917463	1.85022	2.00001	1.65035	1.44433	2.86777	4.29102	3.22126	5.36343	7.51623	7.71249
foxo3	6.09516	6.67368	7.97588	9.32321	13.156	26.3751	25.7459	10.7777	3.93197	3.36122	5.56945	6.37649	7.1395	8.13879	7.91515	8.23371	9.46389	13.3286	17.9799	22.3623	18.6419	21.5653	24.1225	foxo3a	Cell cycle	Cell surface receptor linked signal transduction
narfl	6.14205	7.73732	8.09192	8.93164	12.3114	25.4252	32.4808	22.9221	14.4583	4.36872	14.2325	9.3617	12.9793	16.8503	18.7447	19.8824	23.7927	24.8503	23.3089	17.4697	25.1013	20.9123	22.0167
serhl2	4.17921	6.95676	8.28088	11.2315	12.0387	25.8284	18.6648	8.45267	3.08687	1.23023	1.72191	0.780242	1.8475	3.86492	4.77342	7.85348	11.0327	14.3212	17.25	7.92038	12.7909	18.225	12.0886
akt2	3.87517	4.44971	6.57585	8.13411	11.9971	30.0587	37.141	39.3961	33.8361	32.1892	34.3617	36.3274	35.3022	38.5197	34.5328	28.7996	32.7173	27.5106	23.801	22.2557	23.571	20.7347	21.119		Cell cycle	Cell surface receptor linked signal transduction	Intracellular signaling cascade	Negative regulation of apoptosis
nr1h2	5.33141	6.10754	8.97714	9.19369	13.2969	20.1259	21.7878	9.82454	4.67111	3.44468	6.84177	7.64058	10.9253	21.0855	20.9683	25.7342	26.7764	30.9413	32.775	28.1189	31.4932	38.9978	37.4966	nr1h3
rad54b	6.16719	7.14774	7.56871	10.1237	14.7454	16.8031	21.5542	17.9917	10.2875	4.64913	1.71576	2.04713	2.37578	2.29155	2.5979	2.37658	3.25342	3.16282	2.85904	2.29079	2.93749	3.05445	2.61888
tstd2	5.62039	7.05048	7.97715	10.2151	12.7354	18.4263	17.796	14.181	9.19605	4.76338	4.5229	4.78937	5.81645	6.09502	6.29028	6.22088	6.00423	4.95233	4.20591	2.63946	3.5711	4.03042	2.82814
ptgr1.2	3.65462	7.26544	7.4553	9.54543	11.1163	11.504	7.09256	7.16296	6.36783	8.84244	1.65261	4.33775	2.02603	5.27875	2.57699	3.2373	2.33236	2.66055	4.91029	5.88912	4.15358	6.4622	9.72168
nipal3	5.08333	5.86559	6.77012	9.70291	10.185	12.8342	17.1309	11.8142	6.27506	3.53875	7.23633	6.93501	7.76478	6.13293	4.74641	4.71057	3.56317	3.11684	2.89209	2.84789	2.68882	2.27423	2.28795
pik3r4	4.22064	5.23966	5.98408	6.70517	9.19509	16.8547	19.3471	13.9632	8.36942	2.95389	4.46667	3.35415	4.74464	5.80856	5.31025	5.46481	5.83676	5.73776	6.29603	5.23978	5.60845	5.94599	7.0209	pik3r4	Cell cycle	Cell surface receptor linked signal transduction	Intracellular signaling cascade	Negative regulation of apoptosis	Phosphate metabolism
rab21	3.43848	4.12673	4.51263	5.72049	7.31076	22.8617	25.9192	9.70532	1.64961	0.737445	0.573443	0.4872	1.23053	2.1339	1.88774	2.36024	2.92048	3.27306	4.05507	4.94561	4.57062	5.76893	5.08516		Cell cycle	Cell surface receptor linked signal transduction	Intracellular signaling cascade
nkrf	2.82969	3.21358	4.9744	6.58114	8.82214	21.4523	25.701	13.5667	8.30942	8.44459	6.39913	6.14961	6.37193	8.98727	7.77306	6.83082	6.50849	5.0159	4.87126	3.84288	4.49652	4.15705	3.5849
urb1	3.82007	4.59209	5.66371	6.53266	8.62785	16.7343	20.2524	19.421	13.3174	10.3501	16.2054	16.9368	18.3285	23.2067	20.6259	19.7747	21.2611	17.7726	13.0566	7.81283	8.76915	6.58705	5.81993
ifngr1	4.07967	4.10336	5.68297	8.14288	9.25573	11.1125	9.43179	6.40035	5.01054	3.71069	7.53523	7.67292	6.68695	7.84583	9.33975	9.50556	8.19446	7.50317	7.22766	7.61506	7.34315	6.35011	8.79822			Cell surface receptor linked signal transduction	Intracellular signaling cascade
c3orf75	3.27704	4.89327	5.64768	6.05625	7.86461	10.3842	12.5598	11.1703	12.1885	5.73839	6.87311	7.89702	9.31939	9.08282	10.3852	10.2795	10.1467	16.3265	16.2338	13.5245	14.4932	15.0671	10.071
prkcz	3.41987	4.29631	4.66565	5.82747	7.5441	11.8317	8.01403	1.98333	0.796512	0.541367	5.97562	5.47551	6.5927	5.80078	5.81502	3.35004	3.05586	3.01862	3.26308	3.9442	4.40785	4.7342	5.45706				Intracellular signaling cascade
LOC733709	1.9928	2.64329	3.05108	5.80174	7.41491	16.529	11.5349	13.8033	29.3782	53.977	28.2979	29.9394	24.8852	16.281	9.87296	5.36933	3.34388	1.32765	0.856687	0.802568	0.472954	1.18826	1.28938
dlgap4	2.87755	4.34907	4.61675	4.98521	6.0219	7.48131	5.95698	7.06096	9.26773	10.9852	23.1335	26.6117	29.4466	34.6847	33.5021	33.6802	31.3216	38.1859	41.6674	43.9944	41.472	40.9151	38.4712
slc20a1	2.17051	2.61654	2.75284	3.34756	5.58012	12.6535	58.2846	86.1394	160.335	138.473	150.599	112.402	133.691	164.917	174.023	187.773	200.279	206.919	163.406	248.528	155.059	161.988	149.401						Phosphate metabolism
capn7	2.92576	3.21436	3.23068	4.82631	5.95116	8.95854	9.93786	7.68969	5.18945	1.93125	1.74564	2.28886	3.78051	6.42668	6.11266	5.21806	4.77637	4.79359	5.46658	5.08668	4.60303	4.36853	5.65313				Intracellular signaling cascade
med11	2.54377	2.5756	2.84836	3.69221	6.15988	10.3894	8.35473	4.69909	7.87485	8.23823	10.4576	8.50769	11.7016	13.4023	12.9468	12.9796	11.332	9.22605	9.05136	8.2876	9.98953	8.14607	7.73204
ttc39b	1.3649	1.81343	3.4879	4.28229	6.02471	8.81073	10.5858	8.46355	3.74547	1.84305	1.71218	1.03414	1.49319	4.99268	5.2285	7.54037	7.87837	7.30892	6.88887	9.66874	10.6238	9.32236	15.4235
c4orf29	1.23148	1.30683	2.76545	3.53019	6.14888	8.62559	6.11544	4.55012	2.15757	1.84881	1.15006	1.85651	2.81063	2.75122	2.29148	2.49476	2.07839	2.34441	3.72749	4.36439	5.05103	6.1465	7.01177
ttc39a	0.968004	2.08222	2.12023	2.72713	4.5117	8.28898	6.26099	1.50044	2.6518	5.32535	12.7919	8.21588	8.41655	4.82809	3.26816	1.9098	1.75596	1.11068	1.43403	0.779235	1.26621	1.83778	2.02786
ddah1	2.06514	2.54422	2.73982	3.1901	4.32772	4.69309	4.51252	4.1163	3.99839	3.36436	1.47904	1.79259	1.58811	2.74584	2.57305	3.63844	3.82257	4.78835	6.3747	7.56918	7.54619	8.6307	10.0936
slc7a6	1.57905	2.0973	2.25906	2.406	3.48544	5.67834	6.75825	5.94841	6.37016	6.1605	8.28265	9.3099	10.7471	11.5414	8.35331	7.60748	6.92265	6.51712	7.79827	2.66963	4.93587	6.75462	3.81393
arhgap6	1.49106	1.58571	2.03312	2.49555	4.10065	4.95108	4.41867	2.98623	2.70805	3.47924	3.28151	3.05759	3.07537	2.06927	1.462	1.84123	1.26367	0.83777	1.03267	0.880028	0.645781	0.992887	1.11466				Intracellular signaling cascade
rhpn2	1.03466	1.45212	1.7638	1.85553	2.81217	3.10182	4.62918	6.57037	7.15797	7.84584	8.13969	8.71952	8.22864	10.5957	6.34628	6.43584	6.51268	4.46159	5.58674	3.74697	4.84631	4.788	7.06529
pgm1	0.66479	0.735723	0.849088	1.48955	2.2331	5.21008	6.70906	5.91464	3.66755	5.32047	1.82057	2.18402	2.14	6.20958	8.17872	15.9234	18.4666	21.5868	20.6551	18.733	16.5931	14.9474	13.9065	pgm1
tmem208	0	0.766416	1.32746	2.33293	2.92401	3.60046	3.47494	2.86496	5.11124	11.3195	28.0513	9.74025	20.1707	24.0754	18.9199	30.1861	27.1848	16.2519	20.5976	8.75882	17.8458	10.8924	11.623	zgc:77041
slc38a9	0.623376	1.10399	1.43334	1.53653	1.94429	3.73619	4.94714	4.74549	3.30477	1.55898	0.732151	1.05553	1.39698	2.07123	1.83936	1.86702	1.31859	0.952979	1.02271	1.63104	1.18826	1.09204	1.74764
ehd3	0.352702	0.936667	1.08102	1.26436	2.03115	2.43885	2.87913	2.36335	1.81433	1.94076	9.92815	8.63365	12.5787	25.0271	24.9422	28.0446	28.1295	37.4416	29.4525	25.2742	33.9222	45.6064	43.8124
tbce	0.369055	0.653318	1.13102	1.32292	1.59407	2.89206	2.74499	1.42595	0.975586	0.369243	0.144205	0.220255	0.361097	0.918536	0.599638	0.528172	0.992708	1.05659	1.27299	1.4858	1.26473	1.15512	1.11427
