# Supplementary material for: RNA sequencing reveals a diverse and dynamic repertoire of the Xenopus tropicalis transcriptome over development
Source: HighWire-hosted journal article supplement (doi:10.1101/gr.141424.112), 2012-09-07
Supplement: GENOME_2012_141424.zip [file File S5 - Pre-MBT genes 2.xls]

## Sheet: Pre-MBT 2
Gene	2-cell	4-cell	8-cell	16-cell	Stage 6	Stage 8	Stage 9	Stage 10	Stage 11-12	Stage 13-14	Stage 15	Stage 16-18	Stage 19	Stage 20-21	Stage 22-23	Stage 24-26	Stage 28	Stage 31-32	Stage 33-34	Stage 38-39	Stage 40	Stage 41-42	Stage 44-45	Zebrafish	GO terms
LOC100170544	139.422	189.912	231.133	305.518	415.509	532.364	489.246	263.148	130.528	91.7292	85.944	88.0738	77.962	59.1895	55.9682	42.4997	39.1635	42.3705	37.1496	34.4561	30.8459	26.872	22.7055
oct25	120.699	155.098	172.089	215.115	242.054	321.742	1087.82	2253.88	1110.96	401.211	14.4604	14.4335	7.09871	4.53179	3.89561	2.22529	1.29709	1.24669	0.388574	0.271111	0.171534	0.124521	0
znf674	105.939	134.027	142.138	163.651	237.965	389.436	360.345	201.671	76.9846	65.4515	29.1191	48.7411	31.8481	34.8507	36.423	35.7304	27.31	29.8675	29.805	22.7409	22.1833	18.9576	22.0673							Metabolism				Primary metabolism
lsm12	75.0503	101.698	113.883	135.62	180.433	215.35	204.96	239.345	249.918	171.959	122.186	132.61	153.036	141.908	154.814	123.943	114.284	86.1582	89.9986	83.337	88.0261	74.611	65.348
ryk	65.4115	83.3502	105.545	132.574	171.937	262.661	232.394	156.625	115.328	114.099	63.0835	63.8391	62.8444	53.3122	53.4451	46.1793	46.9582	50.8925	45.4275	49.734	48.5035	45.7048	49.5233			Cell cycle			Intracellular signaling cascade	Metabolism		Negative regulation of apoptosis		Primary metabolism
fip1l1	69.9868	77.4735	96.2857	105.492	148.963	212.636	223.159	231.249	180.338	139.718	95.7055	103.938	110.433	134.38	149.299	150.324	149.275	142.178	124.101	122.315	106.811	90.7572	96.3621
c12orf41	68.5695	78.7727	87.525	101.795	140.5	227.14	216.605	162.886	110.902	93.4746	76.6808	68.6884	55.2534	57.853	59.4312	53.4071	45.6044	31.5829	29.5635	29.6412	27.5826	25.1345	27.8442
ddx56	66.6214	75.0592	87.19	107.828	147.683	201.105	205.183	169.277	92.5282	52.3656	54.6767	53.9543	61.1853	76.1763	70.569	65.5064	70.1169	58.5547	48.3353	33.5484	31.6156	26.3594	21.8336							Metabolism				Primary metabolism
manf	52.7291	66.7197	77.8235	95.7787	120.35	240.287	239.441	233.102	331.356	333.013	234.33	187.029	203.963	219.227	217.345	198.929	235.631	180.51	174.899	154.699	160.275	140.642	148.862	manf						Metabolism				Primary metabolism
ccnk	56.5617	70.2016	76.534	84.8217	125.705	228.119	257.635	231.824	165.697	140.905	122.305	122.282	119.506	128.19	131.48	131.838	129.129	106.225	90.4779	85.2699	80.8145	71.9383	70.8214			Cell cycle				Metabolism				Primary metabolism
LOC733735	61.5679	79.6917	92.839	104.039	126.135	165.598	137.508	162.998	154.28	127.003	47.7201	48.4898	45.1514	47.1039	47.3383	46.6942	48.2499	49.1802	42.6011	57.1427	42.021	39.2041	39.492
pole3	52.1247	88.304	88.3428	136.695	116.696	141.96	141.204	128.849	111.13	93.2586	101.226	97.6978	102.193	92.5795	115.547	101.624	134.979	137.696	121.594	114.49	116.861	122.411	86.4768			Cell cycle				Metabolism				Primary metabolism
ets2	60.5961	76.3017	78.1534	105.402	121.444	178.214	235.99	236.291	189.144	153.264	82.6635	74.2075	69.6659	55.4679	47.0526	36.0525	29.6042	26.2775	19.6412	32.8392	20.7099	23.3393	26.7511			Cell cycle		Immune response	Intracellular signaling cascade	Metabolism				Primary metabolism
slain2	63.4953	74.9189	86.844	98.2743	129.568	160.284	161.376	115.455	46.0956	17.8673	15.9346	12.8953	15.5657	17.2395	14.7594	14.8122	14.4333	13.1392	12.3096	11.2099	11.7119	11.8002	11.683	zgc:66447
rab11fip4l	61.8982	75.9422	82.8354	94.227	126.851	170.724	156.758	130.062	120.109	107.106	80.9938	83.982	66.5338	42.6918	41.2485	30.2259	20.9776	15.5813	9.5672	11.7924	6.77486	3.14777	3.1586
slc9a3r1	36.171	42.7952	49.3943	59.7403	108.151	304.084	307.525	284.639	178.443	103.137	113.663	116.855	146.273	123.382	123.017	118.04	121.458	172.685	169.677	170.04	141.014	137.596	193.988
ccnf	42.8757	55.3593	58.6536	78.8411	112.08	228.828	289.092	371.451	236.789	164.586	142.817	104.115	105.45	110.75	108.468	86.1528	71.4638	71.1868	55.62	56.0812	52.7818	43.8359	38.4551			Cell cycle					Mitosis
pold2	43.454	59.3545	63.2016	91.8317	113.941	187.753	135.152	33.2196	10.8509	5.99027	10.1155	7.01494	9.04391	19.9035	19.3489	19.6575	19.9532	28.219	31.6625	26.619	29.5296	31.012	24.6926			Cell cycle				Metabolism				Primary metabolism
dmap1	53.0739	65.9328	79.7628	85.3304	112.06	146.206	138.235	122.405	127.606	115.583	89.0781	92.0304	85.3158	94.3814	88.0185	74.4961	69.8868	63.7656	55.4255	63.24	54.769	47.6204	42.8245	dmap1
vamp3	55.0917	72.1614	87.716	82.8417	110.369	107.119	105.978	75.5889	38.0724	11.72	13.0705	18.1878	23.463	30.2425	23.417	21.5286	26.843	26.8809	33.8825	33.9538	31.1655	31.2581	28.2708							Metabolism				Primary metabolism
utp6	25.1018	87.5862	87.3491	74.4688	113.849	126.332	97.445	119.245	155.499	293.602	172.387	202.712	185.473	166.293	149.322	162.993	121.517	128.047	120.801	84.7609	71.6194	73.4405	53.3522	utp6						Metabolism				Primary metabolism
actb	46.8678	50.8479	61.4904	67.8289	97.696	167.942	283.451	319.409	466.894	803.487	1746.58	1455.66	1772.96	2645.56	2704.81	2817.67	3016.31	2114.8	2391.2	2161.28	2404.65	2581.02	2078.02	bactin2		Cell cycle	Cytokinesis				Mitosis
slc25a3	34.4887	43.9617	43.925	56.036	84.7266	204.731	253.742	269.786	340.946	355.526	400.788	382.941	437.267	461.597	474.637	458.549	523.294	473.741	474.416	386.152	445.849	426.424	391.641							Metabolism			Phosphate metabolism	Primary metabolism
pabpn1l	46.0197	59.12	62.3057	70.0846	104.654	124.114	84.2227	43.6385	23.6314	7.27231	1.69692	2.01826	0.606902	1.60357	0.784024	0.251657	0.0929153	0.645649	0.666601	0	0.276003	0.889092	0.835801
ruvbl2	36.8327	47.582	49.6934	66.3345	90.4944	166.706	192.605	196.845	210.945	183.543	269.26	208.332	216.555	176.389	165.168	149.257	151.866	116.826	106.421	91.9478	100.155	85.0495	78.2925							Metabolism				Primary metabolism
gpbp1l1	35.4466	33.5639	43.9613	49.1521	74.1368	190.393	170.207	94.443	62.2574	60.5164	48.6755	63.5942	60.871	65.9339	65.2942	56.4563	56.598	55.6237	51.6636	42.455	45.14	45.3466	48.0719
cbx4	40.9835	46.3897	60.5791	57.8549	82.5037	136.425	56.9255	4.76551	1.38528	1.7236	6.94556	5.48432	5.37488	8.65189	6.99931	9.91021	10.7323	13.4311	14.2012	24.9682	25.4138	31.056	38.3261							Metabolism				Primary metabolism
pkmyt1	38.0382	48.4139	46.0792	64.5318	84.629	135.111	150.542	115.136	54.3505	26.7747	24.1824	15.7271	18.0546	22.6587	20.7197	23.6396	21.4112	20.7425	22.8855	19.62	20.9599	20.6441	23.3329			Cell cycle				Metabolism	Mitosis			Primary metabolism
arl9	43.7983	52.3313	63.4458	73.1372	91.3675	88.135	79.1622	55.131	25.016	13.8838	12.8636	10.0149	13.2275	19.6523	16.6228	18.9488	14.3441	11.0087	8.52493	5.72517	8.27919	7.15985	9.29758
ahcy	31.3793	38.5485	40.9394	51.4589	75.766	166.148	283.121	289.627	277.129	249.08	151.95	161.399	162.97	177.197	175.925	208.483	254.182	402.801	476.221	479.026	445.595	519.547	546.973	ahcy						Metabolism				Primary metabolism
pcf11	37.2805	42.3547	48.2235	53.0814	77.7222	144.965	153.308	124.245	107.368	93.6006	60.2029	50.5523	65.0549	65.2635	62.9299	52.9221	62.4406	42.5451	35.2861	41.0547	31.2721	32.1456	28.2951							Metabolism				Primary metabolism
grk5	35.0315	35.5155	46.7854	55.9543	80.3625	126.728	133.066	172.241	191.651	181.17	73.5647	83.8204	58.0461	58.382	47.8472	36.7551	41.834	35.4523	28.7579	28.595	26.6531	26.3867	24.4722							Metabolism				Primary metabolism
tgif1	29.9763	37.1088	42.3568	52.5032	62.9651	151.602	128.834	63.4741	46.1833	53.9293	87.5556	79.772	87.245	87.6686	91.5175	77.3588	73.4127	63.3691	50.4006	45.187	36.7957	30.0686	25.3303							Metabolism				Primary metabolism
gart	38.1314	39.8364	47.0387	61.6823	76.4728	111.115	116.554	101.826	63.1697	60.7162	48.8899	50.8739	53.0583	73.1439	72.112	63.5548	59.6457	57.8543	40.5522	32.0162	27.7193	19.5637	17.0887							Metabolism				Primary metabolism
prep	29.1579	41.9068	43.1926	53.9867	70.8436	130.396	131.071	122.646	122.545	76.9115	28.5521	24.2542	14.3945	8.78876	6.70885	7.24879	8.5668	28.896	34.5936	65.1927	54.177	51.08	55.618	prep						Metabolism				Primary metabolism
polr3d	31.3146	42.7432	47.7216	47.3486	66.6595	125.485	113.333	41.2121	22.7838	17.3271	29.1388	25.4867	35.8233	56.7718	58.6633	55.7799	61.5947	48.6353	39.7233	34.3684	38.9843	36.0932	36.3694							Metabolism				Primary metabolism
mrpl45	32.8238	40.2011	47.9598	53.0432	69.0456	113.841	121.333	103.393	88.1387	44.8329	35.92	32.0281	36.8369	49.979	55.5275	55.0319	57.6001	55.5408	55.4736	49.8422	62.5947	53.4612	54.282		Amino acid and derivative metabolism					Metabolism				Primary metabolism
med7	32.4885	43.8438	51.0982	57.1315	66.3173	95.151	64.3792	65.4768	63.3488	60.6951	37.2841	36.9578	37.5247	38.9386	41.778	41.0716	36.6525	38.4014	30.8004	26.1673	30.5333	27.4757	26.3665	med7
cdk5r2	22.302	36.5594	47.0661	55.598	74.4931	102.402	97.9186	39.1761	12.7247	5.72539	2.62117	2.76063	1.5408	2.43092	2.53024	3.38933	4.95896	13.2385	24.6329	34.9422	37.1131	44.6892	47.1162			Cell cycle				Metabolism				Primary metabolism
rpn1	32.7575	35.1673	46.5262	52.222	70.58	97.2361	128.543	108.954	89.0157	103.258	100.005	96.8576	93.056	96.4858	90.1334	100.442	109.182	102.009	115.885	93.3149	109.659	114.282	114.47			Cell cycle				Metabolism				Primary metabolism
net1	28.9617	36.8699	46.4121	51.5538	73.6191	86.5669	90.7448	45.1747	26.9846	24.2769	32.5881	27.1382	29.251	34.0105	30.3279	29.7864	29.1783	16.3388	15.1274	14.0397	15.806	15.7171	12.2311		Amino acid and derivative metabolism	Cell cycle				Metabolism				Primary metabolism
LOC100158552	23.2264	25.8464	32.6977	36.9022	58.6629	141.985	158.411	91.212	51.2689	48.2932	40.9881	33.9059	36.3473	41.9477	39.8749	35.8397	34.3246	30.9034	27.4475	27.9976	28.6403	24.8064	23.0165	zgc:109953
mrps24	32.1347	32.6077	37.6556	45.2952	67.8876	101.723	77.5521	60.0565	66.7237	57.0919	57.7967	49.4704	86.8764	113.447	121.523	156.169	169.501	201.346	229.252	179.06	246.015	234.593	253.338	mrps24						Metabolism				Primary metabolism
exosc9	24.8127	36.5016	40.6681	47.9929	68.0199	90.0237	87.3295	75.9899	46.3234	21.8777	21.2127	14.0666	22.1662	30.4415	31.7722	30.6157	36.0872	24.9461	23.3428	14.9478	23.116	17.4904	10.9331	exosc9						Metabolism				Primary metabolism
lfng	29.0927	28.7064	40.0067	45.4481	68.796	94.1776	50.5383	29.7466	53.1063	65.8131	38.748	48.2784	45.7256	53.5294	46.0215	44.2195	35.9735	34.9786	27.3809	20.9146	21.2809	23.6555	27.7943
lpin1	22.2105	30.3232	35.4003	38.3931	58.7408	117.011	102.669	38.7598	14.2492	4.35221	1.49404	1.67852	0.928542	1.8327	2.12536	2.74053	3.73842	5.9022	7.58706	12.2392	14.7576	16.5066	20.9704							Metabolism				Primary metabolism
elovl7	26.0372	28.1806	27.2065	38.227	52.4877	128.504	148.59	172.039	173.811	187.279	268.302	212.292	177.851	101.706	86.6331	74.8029	64.8499	46.2247	34.3106	32.9015	30.0276	31.2437	29.8905							Metabolism				Primary metabolism
gpi	27.6649	30.7848	31.1764	38.66	59.221	89.2235	87.7142	47.9287	27.489	9.64985	6.89377	4.92073	6.24566	8.96165	9.07371	24.655	41.2114	36.5664	42.9032	46.5966	47.4077	69.747	63.0252							Metabolism				Primary metabolism
ccnl2	27.6227	30.5578	38.9757	41.0381	56.6184	77.0197	33.0658	36.4706	54.9852	55.9698	41.706	35.9013	38.2517	40.4952	39.3376	43.9078	44.2233	31.259	32.737	39.7724	33.9535	30.1267	28.1899	ccnl1		Cell cycle				Metabolism				Primary metabolism
ddx6	24.9544	28.5817	32.7593	40.2521	55.306	84.8269	90.4381	49.8081	38.4286	36.3994	31.927	39.073	39.1729	45.5313	39.0629	34.2183	36.2594	39.2668	37.9449	39.4681	35.9651	37.8743	33.7446							Metabolism				Primary metabolism
med4	25.4809	36.2624	38.4608	43.8727	55.9465	65.1501	37.2092	23.9152	25.5515	27.0513	16.236	16.4569	17.7305	22.6661	21.0979	19.0624	21.773	13.4276	13.2759	13.5618	11.8773	10.4225	10.1307							Metabolism				Primary metabolism
spop	24.6699	33.0343	32.3515	44.2256	50.3434	80.1676	76.3128	51.4128	43.6252	29.9549	36.4397	33.8792	37.1534	40.3177	37.0342	36.0029	34.815	33.1232	36.0966	35.5329	40.0119	43.6454	40.6381	spop						Metabolism				Primary metabolism
zc3hc1	26.2591	30.2082	34.5211	45.2705	56.3437	71.863	73.3792	68.49	63.3295	62.663	62.0274	53.9464	55.1473	56.5867	51.2177	49.9452	48.6133	42.4244	37.7606	24.9121	31.229	26.3846	19.0448
arih2	15.1189	24.0856	25.327	28.8155	49.7377	118.691	136.648	117.915	66.3391	34.2462	44.9527	43.0328	49.7497	59.542	59.5277	52.4577	52.8155	56.5391	53.5184	44.3841	48.1069	44.3019	43.3984						Intracellular signaling cascade	Metabolism				Primary metabolism
stx18	25.4716	25.3246	34.8443	36.2917	55.3226	80.8087	75.4784	52.1436	32.7445	23.0365	26.0545	34.7235	31.645	26.2964	24.8671	27.103	22.3986	16.8314	19.6737	17.2563	17.3367	18.8642	17.9795
kifc3	25.655	35.6445	44.5835	43.6712	51.8146	56.6683	59.3834	29.7291	21.7688	16.1069	30.4807	24.4686	25.6399	21.2445	19.1144	17.4637	20.3995	17.8111	19.5408	19.3279	24.587	29.4407	32.0291			Cell cycle	Cytokinesis				Mitosis
phf12	26.195	33.1101	39.9437	47.6617	52.6053	57.395	77.1412	61.818	49.2865	45.5185	29.2735	27.1377	24.8948	26.1261	22.2563	23.0242	20.908	20.4872	18.3909	17.9875	16.8706	16.2222	14.393							Metabolism				Primary metabolism
ptpn21	22.9112	27.8477	34.5685	42.3058	53.704	70.8909	63.4284	27.7625	11.0141	7.30334	8.16356	11.3564	8.61953	10.7071	8.6183	7.17691	7.99135	6.59244	6.83059	6.9394	7.36463	8.9453	8.71521			Cell cycle	Cytokinesis		Intracellular signaling cascade	Metabolism	Mitosis			Primary metabolism
zdhhc5	21.0399	33.4633	41.3734	42.9511	57.9695	54.7336	61.4221	40.8863	18.5799	10.251	11.9508	9.22005	10.2509	10.0587	10.4411	12.3259	10.5548	8.63573	8.02995	9.37891	11.17	8.01929	8.09703
rab11b.1	26.0146	29.1835	35.8946	38.7349	53.9501	64.6367	76.6731	57.6997	39.5014	28.1182	33.0688	26.0978	34.2375	51.2864	47.7983	55.6881	56.6023	42.054	49.4939	40.2555	47.0212	40.0008	38.2733			Cell cycle			Intracellular signaling cascade
mthfd1	20.4943	25.9834	28.4807	29.5085	47.1087	95.2251	138.02	121.699	124.865	110.721	130.428	156.193	161.41	198.032	190.857	205.358	203.831	180.234	161.46	113.289	102.363	75.098	88.8536		Amino acid and derivative metabolism					Metabolism				Primary metabolism
ipo9	24.9596	29.1179	33.2753	40.9809	50.419	66.9282	66.6773	49.4427	22.4005	9.38973	9.43606	7.79349	10.0065	15.1388	14.4817	16.05	19.178	18.1611	19.458	12.5779	16.9591	18.3404	12.7215	ipo9						Metabolism				Primary metabolism
idi1	20.679	24.5312	32.0563	35.17	50.0218	79.1198	86.3848	76.6263	49.5333	34.1918	20.9603	18.8862	18.2667	27.9214	29.2995	32.753	34.6234	43.6246	55.6017	64.9428	70.3363	84.6579	97.7803							Metabolism
pex16	18.3981	26.4187	22.4389	47.101	57.5457	59.6884	53.7604	49.0025	23.4658	21.702	7.09663	10.4682	10.0944	7.85265	16.2301	23.6619	29.7953	32.5862	26.6355	53.2024	27.4174	29.3947	26.4982
mrpl28	20.1117	27.8691	26.9007	35.0536	40.9777	79.1389	59.833	31.1912	17.0214	10.338	6.54555	7.75384	9.28754	18.4201	19.6452	19.2553	26.0423	28.2199	28.3851	30.6512	36.3959	41.9335	51.114							Metabolism				Primary metabolism
lrrcc1	23.1435	29.6748	33.5874	34.5317	46.8609	60.415	60.1932	47.7838	29.0061	13.95	8.41685	8.15195	7.82584	6.36236	5.87062	5.77666	4.86416	5.04795	5.16526	4.34354	4.37119	3.72412	4.26083			Cell cycle					Mitosis
mtx1	18.7023	19.1372	32.3742	34.7257	52.7023	65.2812	69.8143	73.5458	85.9746	66.9114	81.9631	75.1464	94.391	86.0824	80.1929	76.5464	89.4486	106.21	111.304	106.276	109.496	99.4818	91.064	mtx1b
dip2a	18.7083	21.9336	24.2255	29.3951	40.7336	84.736	91.9903	56.5225	24.4764	14.1538	30.4954	34.9395	35.7671	31.4578	30.5522	26.4252	30.8418	47.2101	42.6686	32.5091	30.4056	29.2999	25.5328	dip2ba
ascc2	16.9963	21.1237	26.5484	30.3689	42.6935	81.859	84.7875	84.0821	51.1463	24.6125	15.8438	12.0596	13.4598	15.3194	17.4338	18.3416	19.1771	24.8041	22.5012	22.3256	22.3543	23.7727	23.6201
xpr1	19.2552	21.8145	28.5221	35.3299	43.2297	69.0273	72.0794	50.4326	30.3317	17.3203	12.2482	13.3221	12.953	17.5623	12.976	13.3612	16.2501	18.8214	24.8842	28.0384	25.982	34.7722	35.7007
polr1d.1	21.8993	28.4365	32.5846	35.4819	45.6312	52.6075	51.7827	45.5883	29.4934	22.6159	22.6836	24.8778	19.2766	22.4703	24.8072	17.1305	17.8792	15.6204	16.7579	15.949	16.7316	16.9411	13.8676							Metabolism				Primary metabolism
sept11	20.1049	24.6075	31.436	35.0962	44.8016	54.4805	49.1993	48.3946	41.4773	30.4334	15.5852	14.1268	13.0581	12.6237	11.8671	13.2418	13.9773	20.0288	20.7535	11.1201	16.2494	16.2956	12.9697			Cell cycle	Cytokinesis				Mitosis
trmt61a	14.7948	19.2618	22.5087	32.0449	41.5907	75.3551	50.0023	47.9699	32.0571	21.6755	29.2633	18.0159	34.6092	60.9269	64.5359	53.9676	60.3198	47.5801	40.206	26.2197	32.7615	23.6638	24.599	trmt61a
rdh13	16.6778	19.3738	24.5702	29.3161	42.7204	72.5573	37.1248	7.1042	1.97238	1.23689	6.2231	4.15373	8.9862	16.6939	17.1685	18.4143	20.2205	17.8277	20.6559	16.424	19.4193	18.187	18.119							Metabolism				Primary metabolism
wrb	21.4674	19.9362	34.5409	31.9838	50.4938	44.4284	22.7122	11.9769	10.9553	12.259	40.8063	45.3868	49.7214	43.265	44.5416	49.6519	58.4133	72.2823	86.8049	105.385	85.9183	106.311	87.483							Metabolism				Primary metabolism
dpp8	11.0609	16.4168	20.8728	29.1394	44.4982	78.46	83.9445	58.4958	43.9318	38.797	34.9425	30.1611	35.9677	47.8278	43.6179	36.9691	44.5764	36.9743	35.8309	31.0514	36.7857	31.7437	28.9178							Metabolism				Primary metabolism
idh3g	18.7277	26.587	29.4899	31.291	41.197	49.9952	52.6587	39.6709	27.0751	14.4441	14.4725	10.3179	11.3893	9.78712	11.165	15.2235	24.2054	48.6802	68.8712	64.405	71.1291	109.053	102.654	idh3g	Amino acid and derivative metabolism					Metabolism				Primary metabolism
ddx10	17.3034	17.0234	27.3411	28.0019	42.1306	63.523	73.027	68.282	63.5821	43.6752	39.2539	37.2063	36.8355	44.3752	39.8942	33.0844	40.9705	30.2432	24.5646	14.7046	17.6489	14.4142	12.5767							Metabolism				Primary metabolism
otx1	17.5309	29.4959	27.3521	28.6571	39.2034	52.2141	43.9749	34.3217	23.8036	29.395	11.2851	11.1099	10.4957	8.94713	7.6646	6.36475	3.84854	4.26381	2.92274	2.32687	1.90656	1.48905	0.997121							Metabolism				Primary metabolism
cradd.1	19.9123	23.3894	27.1846	34.8548	42.1558	46.8375	43.9305	33.2641	15.6851	13.3128	10.1791	10.4392	10.0915	12.1961	12.3202	12.638	11.9417	11.6495	13.9284	11.8377	10.9117	14.8004	13.6454
rnf139	13.7533	14.5968	20.1607	21.8667	33.1163	86.1515	94.4931	71.6355	63.2102	50.3523	41.5229	31.9337	39.5813	42.2414	51.8411	47.4126	49.2389	42.5927	42.3996	36.3455	40.4077	42.3131	41.8581							Metabolism				Primary metabolism
rbm7	15.2608	26.6006	28.3796	30.3928	42.8963	41.1075	63.6185	61.5404	60.7182	52.7348	26.4813	18.3492	15.9876	23.6967	18.6585	16.6774	16.9084	7.80023	10.4335	3.38273	5.61867	6.94985	4.27928	zgc:77304
tesk2	19.7481	21.9393	21.9648	24.9474	42.0591	47.1317	39.9932	13.3765	6.05826	3.54771	1.18166	3.91598	3.02865	2.932	3.37812	3.74732	3.49536	1.54192	3.04697	2.24328	2.21086	2.41492	2.83944			Cell cycle			Intracellular signaling cascade	Metabolism		Negative regulation of apoptosis	Phosphate metabolism	Primary metabolism
kiaa1370	12.8096	18.6707	18.4088	24.2418	34.5254	69.0865	65.8	45.3636	24.6232	14.7336	25.9176	20.2683	20.5199	20.8603	20.2233	19.8584	17.1151	15.096	18.5229	17.5178	18.3957	23.2552	21.2844
nif	15.9374	21.1567	24.2195	27.3438	36.3803	50.348	74.1806	65.443	44.543	29.0729	18.9733	13.8356	22.2611	37.3931	46.7851	79.7308	107.441	145.579	150.036	193.595	145.657	164.09	182.752
cfl1	13.7085	14.1816	20.0295	30.6128	37.4558	53.8503	86.0424	55.1022	44.9213	42.5241	61.2017	41.2331	55.1987	109.843	111.853	141.087	202.042	99.6373	118.796	103.262	127.862	131.444	126.809	cfl1						Metabolism				Primary metabolism
mbip	13.5885	18.0321	17.9034	25.9207	39.9786	53.9393	39.3298	24.6734	18.0297	16.6686	5.46807	8.79306	6.78422	9.25953	8.79305	7.91881	6.47832	5.93151	5.28353	4.94218	3.83323	3.86654	4.15956						Intracellular signaling cascade	Metabolism
agps	15.8202	16.1121	19.1083	28.7492	32.2084	56.9759	65.2975	63.3482	53.1789	36.5612	19.5982	20.9239	18.7416	23.3835	23.2989	29.1457	32.237	34.4188	33.6513	40.4291	30.956	32.5275	36.0018							Metabolism				Primary metabolism
c3orf37	17.5964	19.5521	22.9655	27.156	35.4711	45.6007	45.3692	22.8485	8.43289	3.81473	3.20624	3.49875	3.11302	5.18812	3.96796	3.56004	3.30465	3.87917	2.89845	4.40822	3.05089	5.3244	6.40913
ap1m1	15.4779	17.8429	16.18	28.5484	33.5125	55.4203	47.6904	45.8161	35.3803	27.7297	22.5105	19.6963	23.5037	34.6474	30.7139	35.0346	37.6965	41.5725	48.3081	46.0818	47.98	49.3188	51.8548
cdc14b	8.78122	12.3535	14.9225	20.5652	37.4509	71.9691	68.7008	29.1059	13.2073	9.94118	10.8005	8.91134	10.2048	11.6157	10.2773	9.00048	8.05792	7.15302	6.44144	6.94951	5.41419	5.40425	5.88411	cdc14b		Cell cycle				Metabolism	Mitosis		Phosphate metabolism	Primary metabolism
casp7	14.3379	17.8361	20.5867	22.681	34.4138	50.591	51.0098	59.4055	46.2165	28.1363	20.2547	15.2139	11.9909	11.875	9.71116	18.3407	20.637	37.8223	52.7607	51.0603	100.15	118.949	102.817							Metabolism				Primary metabolism
h2afx	17.7448	21.3071	21.3269	24.0427	38.2749	37.6021	37.8869	39.5626	51.4942	50.672	33.6554	33.4617	26.3949	23.5102	23.8934	18.8268	14.9291	6.87756	7.30071	4.33789	4.43803	4.66253	4.17613							Metabolism				Primary metabolism
csnk1g2	16.6716	21.7519	21.5347	26.1832	33.4819	35.7553	36.9399	32.4041	16.1418	3.42547	1.2165	1.70128	2.86543	3.76159	3.21425	3.2001	3.13376	3.90635	3.66472	3.01686	3.40345	2.91168	3.00994	csnk1g2a, csnk1g2b		Cell cycle	Cytokinesis		Intracellular signaling cascade	Metabolism	Mitosis			Primary metabolism
copz1	13.8045	13.817	23.3918	29.1633	34.2661	40.3242	52.2998	52.6156	58.8639	56.4427	74.3201	62.2669	67.2074	63.969	57.7874	56.3935	65.1113	70.2698	76.9955	53.0811	72.8583	80.137	71.6795	copz1
ctif	14.3218	22.3747	22.36	23.2264	28.9837	36.6212	44.8673	32.643	16.2603	9.24595	21.3435	22.7475	19.9135	19.5966	19.8523	17.171	14.8829	18.7297	17.7837	16.559	17.8884	15.6756	14.1509							Metabolism				Primary metabolism
pak4	11.7276	16.6851	18.2016	21.6503	29.3374	45.8056	43.6687	23.1061	15.4855	14.3627	13.6046	16.9253	15.0901	16.4333	12.8808	11.1463	11.0851	11.1993	11.9235	9.8686	8.9453	10.1513	10.4948							Metabolism			Phosphate metabolism	Primary metabolism
shq1	13.9008	15.9757	19.076	20.4327	29.4395	44.4649	66.2998	49.4755	27.226	15.3436	15.8198	12.8412	16.1021	21.5093	20.4805	15.5718	14.9922	11.5016	6.7571	6.24984	6.69269	5.22776	2.70061							Metabolism				Primary metabolism
fem1b	11.4487	15.9257	19.4094	22.3474	30.035	43.9066	40.0008	19.267	10.1295	7.96749	5.22043	6.02051	6.36503	8.09947	6.18582	6.94904	7.57644	7.19381	6.67918	6.68324	6.76815	7.03402	6.8737
csk	11.4797	16.5097	14.829	20.3148	30.2382	49.3199	46.7526	16.637	5.87361	5.38763	13.6917	13.7566	16.0856	19.0747	16.4547	14.2645	15.943	14.4655	15.9002	13.5347	15.6614	14.8256	16.5035			Cell cycle			Intracellular signaling cascade	Metabolism				Primary metabolism
scrn2	13.3149	15.7689	16.9997	18.2479	28.3816	49.8203	51.5377	31.0472	24.5314	12.3429	7.03353	4.82763	4.37557	2.76026	1.43057	1.68079	1.65478	2.61484	2.02516	2.99576	1.56496	3.96316	3.37826							Metabolism				Primary metabolism
rpa1	9.71597	14.0903	16.5604	20.4149	27.1157	54.042	46.4279	28.1127	27.0013	18.0584	34.021	28.1505	33.1263	41.1888	39.6174	34.4379	37.8837	44.4041	36.468	33.7269	27.6424	29.5555	24.1263			Cell cycle			Intracellular signaling cascade	Metabolism				Primary metabolism
arpc5l	10.2763	17.4426	15.2061	19.355	29.5956	48.1367	47.3044	47.5709	38.2229	47.3228	74.7717	69.9251	89.4235	127.223	119.571	115.439	120.874	119.798	109.974	109.608	112.396	110.435	132.975	arpc5la
btbd17	8.73763	12.1583	14.3504	19.0196	30.5467	52.2249	91.1042	70.3803	54.133	34.1042	14.6602	13.1164	6.862	5.89701	5.65158	4.42925	3.42039	1.19263	0.323341	0.125614	0.475865	0.632979	0.134593
xiap	9.74482	16.175	17.2454	24.3287	28.5599	40.9117	30.7552	19.1076	9.05577	8.70464	4.08256	6.92698	4.86827	7.87158	8.84182	7.83595	6.4213	6.37971	5.82509	5.32407	5.502	5.44967	5.10376
metap1	8.65221	10.0388	21.5205	17.4368	29.8608	49.3322	46.0018	31.3105	21.5836	11.2319	10.504	8.89303	12.9219	20.5613	17.0345	18.3149	25.1839	16.3521	18.2079	8.05892	13.3354	12.0901	12.3628							Metabolism				Primary metabolism
c22orf32	11.0147	17.3044	19.0081	20.5634	29.0106	39.23	23.1227	18.8927	18.8822	21.8371	28.9896	33.2655	40.1266	67.0917	64.4691	88.802	106.185	107.09	141.308	170.707	183.886	187.104	241.328
cyb5b	13.6044	15.0659	17.8826	20.2546	30.4187	36.856	37.0258	35.8742	25.1968	14.6392	14.2996	12.6028	16.5091	24.8576	24.6269	20.394	23.7554	27.2432	28.8258	26.0073	31.3034	31.552	28.8137							Metabolism				Primary metabolism
c2orf42	12.1303	14.2118	15.673	19.9835	25.1691	44.4057	37.9402	25.742	12.9493	8.74511	8.08889	10.9334	11.1755	15.8396	14.4256	12.7209	13.1636	11.8516	11.5097	11.9214	11.4822	11.4991	12.6184	C2orf42
spats2	8.2445	12.1577	12.6502	15.8524	19.0868	60.7693	89.8135	58.3803	28.3415	25.6034	27.5783	33.5996	28.0669	26.9882	25.556	23.674	21.7564	21.8537	19.8384	20.7333	20.1935	18.1733	15.5902
selo	12.6263	15.7693	18.2651	22.1591	25.4588	32.3767	29.8579	23.1115	13.9323	7.7715	4.86582	4.6983	5.0327	7.35819	7.05941	6.78933	7.30278	7.55151	7.5803	8.63073	7.01363	7.24498	6.85063
syngr2	11.6835	16.3654	18.886	23.0168	24.7687	30.8194	34.1638	31.7323	42.454	49.3268	69.2364	62.0324	72.0669	69.5176	61.4561	59.4415	56.8272	41.0004	40.5314	31.6051	35.6116	36.6657	43.7112
map2k6	12.2515	14.4758	15.6335	23.4712	27.3255	32.0651	39.2446	69.6169	119.629	133.885	100.869	115.213	89.8809	82.1599	68.6806	55.8566	56.2234	49.8915	49.1579	44.4148	41.5276	40.1984	35.4971							Metabolism			Phosphate metabolism	Primary metabolism
aen	9.3791	11.7185	13.523	18.5415	27.1125	44.3587	43.5007	28.2384	11.4069	3.78827	5.19081	2.83124	4.42376	12.0542	10.3999	9.31095	11.1567	8.7446	6.40628	4.45218	3.85651	4.1767	3.31909							Metabolism				Primary metabolism
ptpn12	9.1381	13.2831	16.4491	18.5998	25.0716	41.6395	43.2535	24.2933	10.3718	6.21382	10.3485	11.9048	11.4951	12.4831	10.5337	9.84826	9.22524	9.10487	8.45209	8.97217	7.75515	8.65803	7.88219			Cell cycle	Cytokinesis		Intracellular signaling cascade	Metabolism	Mitosis			Primary metabolism
wdr77	7.6929	10.3139	10.132	17.7842	20.4925	52.6016	36.0167	8.14928	7.67969	6.33351	4.24822	8.36748	7.25139	15.8095	17.0629	20.7523	25.223	25.509	25.6046	25.585	26.1037	24.4051	27.8309							Metabolism				Primary metabolism
cxorf26	8.71022	11.0033	10.6687	16.497	23.1795	48.3932	42.5325	18.1318	10.607	4.48344	9.29475	7.50252	14.2663	26.4575	26.1692	26.886	31.8802	30.3179	31.0686	30.6691	35.3438	39.3585	35.639	zgc:92611
hat1	10.969	15.1559	15.2836	22.0453	22.65	29.7281	28.194	11.8293	9.38892	6.48433	6.50204	6.41969	9.81607	15.5239	13.5861	12.6781	17.5721	17.9679	21.401	19.4021	22.5463	20.767	20.9314	hat1						Metabolism				Primary metabolism
rhou	5.9149	6.34644	10.0712	11.4048	20.3004	61.3079	40.8723	30.7591	23.1759	35.058	36.852	31.7428	29.9251	32.7218	29.2787	25.376	22.4569	16.6983	13.3576	10.6795	10.7858	10.035	12.8333						Intracellular signaling cascade
comt.2	10.3498	14.4184	15.0747	13.9119	22.6291	37.8123	33.0911	22.1077	15.5832	8.91725	9.28197	8.08061	10.0144	12.9553	16.0301	19.1967	26.2875	24.283	31.8552	22.5324	28.0158	27.7962	22.8166		Amino acid and derivative metabolism					Metabolism				Primary metabolism
nfrkb	9.6536	10.1576	14.0249	16.2182	24.1977	39.2453	44.0319	38.1191	26.7704	26.3821	16.0736	12.9015	13.0472	14.4103	13.5205	14.8917	14.8411	12.6911	14.1969	10.5645	12.2908	11.7362	11.3797	wu:fi86h10						Metabolism				Primary metabolism
exoc7	11.6706	13.9784	13.8529	17.6888	23.8849	30.6983	26.6291	10.9727	2.32171	3.60574	17.3169	18.9266	24.5877	26.7123	27.5612	30.6926	26.918	30.0874	34.297	39.6585	35.6355	40.2854	38.049
fbxo21	10.3561	13.364	15.1202	17.9023	23.7095	30.9677	24.4225	14.5911	4.92746	2.36782	2.54984	1.88686	2.11477	3.81089	4.63874	5.08717	5.23581	7.9185	10.4789	10.2426	8.29379	10.5351	7.52947
leprel4	9.49513	11.2965	13.616	16.0063	21.3509	36.8532	61.9623	43.7778	39.2461	34.8012	53.3141	53.731	43.8319	41.2854	41.9716	35.3735	32.2249	39.4536	42.3184	44.835	47.4109	77.9367	49.8767
rfc2	8.14199	10.6067	13.8265	20.4744	23.1013	29.9912	32.4014	24.6512	17.2046	6.40784	13.1512	6.57046	11.1116	14.8277	17.5554	17.8475	21.771	13.5016	14.9724	4.68786	13.9051	14.9679	6.35591	rfc2		Cell cycle				Metabolism				Primary metabolism
c19orf10	4.96137	13.5889	15.134	17.7452	23.8634	29.924	16.702	14.156	9.23083	7.4612	7.98745	13.1526	16.9715	13.9578	23.3807	25.9605	26.1971	39.1721	49.742	27.1295	52.9131	68.6622	57.5605
plekhg4	8.70384	10.4029	12.9557	15.8217	22.1408	34.9133	35.979	16.2793	12.4261	10.5628	10.464	7.82867	8.2786	9.76949	9.46572	8.46499	9.21256	8.66707	7.27072	6.02938	6.56037	6.78658	5.33942					Immune response	Intracellular signaling cascade
kidins220	7.81812	8.55041	11.9271	12.7335	21.8502	42.0403	49.4058	32.2523	17.0425	11.892	12.1818	14.0018	15.6657	15.9908	14.2369	14.7635	16.7471	18.009	24.1241	26.0109	26.2869	31.9578	33.5926
mast2	10.1157	13.3989	15.4142	15.348	20.7277	28.6987	29.7161	15.148	7.08384	2.56164	3.90243	3.94433	4.39142	7.25282	5.59183	6.95216	7.46242	9.47934	11.3245	12.7283	12.6996	12.6163	13.6834			Cell cycle			Intracellular signaling cascade	Metabolism				Primary metabolism
znf180	8.49379	11.1977	9.23107	15.2238	24.1108	35.1554	24.8964	11.3611	7.11538	6.05703	7.34575	8.27034	8.74242	12.0713	8.81119	10.3466	8.12588	8.48655	6.23469	8.73061	7.2953	7.98716	8.57422							Metabolism				Primary metabolism
cand1	9.7502	11.3802	12.2519	16.4474	20.592	31.1354	39.3083	28.0855	15.0001	7.04571	6.41426	5.19849	8.01338	13.7635	12.9219	15.2584	18.1836	15.7665	15.9206	13.2107	15.1867	13.9232	13.4209	cand1						Metabolism				Primary metabolism
tigd3	8.83399	13.2397	12.8246	14.6671	20.1946	29.875	36.5947	29.695	16.0358	8.0167	6.93893	6.40141	4.16881	4.3118	3.96294	5.03459	4.41017	5.76333	5.77572	5.17901	5.8325	5.56486	5.17408							Metabolism				Primary metabolism
c10orf35	9.62908	14.2677	14.4473	13.6969	19.8559	26.0953	13.618	4.78492	2.88433	3.26036	3.51771	4.2621	4.3241	5.4982	5.37103	4.48183	4.88309	7.42888	9.044	9.35445	11.8127	15.0406	17.8361
dcp2	9.65296	12.313	14.7117	13.4907	22.1399	23.3823	28.0754	24.4755	18.3937	14.9761	6.52995	8.79657	7.14569	12.4309	7.3207	8.60513	11.1977	11.1891	12.597	9.48398	9.66471	9.52966	8.0446							Metabolism				Primary metabolism
rgs19	8.84944	10.8477	12.8671	15.0996	18.7834	29.0279	34.1749	34.5743	35.1378	31.4119	27.6894	36.7916	27.9549	23.7341	23.5261	21.0877	21.982	17.7455	17.0933	12.0576	16.145	14.3616	10.2762
vmp1	8.54431	12.1332	13.8732	15.77	20.6164	22.8283	27.565	25.5346	19.819	12.8187	6.60527	5.21373	6.77261	9.09223	8.25015	9.13844	9.96365	12.7419	14.6891	10.721	11.7512	11.1865	9.75475
cnksr2	9.25486	11.6518	12.888	12.2046	19.1726	26.1144	18.2192	4.23546	1.50004	0.349942	0.122437	0.217695	0.153354	0.324095	0.222741	0.0812113	0.119916	0.268385	0.134791	0.187756	0.505714	0.864153	1.27457
eif2a	9.58937	12.2813	12.8161	14.8106	19.9619	21.7662	15.124	14.9314	12.1323	14.6097	17.7992	19.11	28.3254	43.4577	47.7003	46.5789	48.9769	40.7228	36.5485	36.3421	37.4711	33.5312	36.3963							Metabolism				Primary metabolism
gpr160	8.74612	11.3524	12.7053	16.5456	17.5372	24.1885	20.1294	15.0099	9.69566	10.404	6.52681	11.2849	8.30721	11.4436	11.361	11.8812	9.78095	7.34198	6.36599	10.1727	5.84403	6.93841	13.413
rela	8.68347	9.67572	11.4524	13.0567	22.041	24.9266	21.3813	14.833	10.2041	10.577	9.99002	11.7825	12.0189	14.9595	11.9259	10.1086	11.1011	8.3022	7.30973	6.08822	6.14444	6.87579	6.16145			Cell cycle		Immune response	Intracellular signaling cascade	Metabolism		Negative regulation of apoptosis		Primary metabolism
sesn3	10.297	10.9334	10.9366	12.1789	21.1534	23.7298	26.143	15.7867	13.5218	26.4798	21.3737	36.0981	19.0845	28.3355	23.3888	26.4012	29.8153	25.2121	24.7669	22.0566	23.5817	30.0705	31.8002			Cell cycle
lcmt1	5.8535	6.98333	11.9427	13.8918	19.9585	29.3932	21.5811	25.0091	22.0378	15.5291	3.86005	4.40262	3.8973	3.74618	3.30462	4.47849	4.93281	10.7883	14.0636	16.9773	20.1899	25.2853	31.3098
LOC100127651	9.09808	10.2151	11.2555	13.2083	18.3696	24.4577	30.3423	20.7963	11.7915	6.23843	13.4284	11.5679	11.8304	12.7053	13.4282	16.6439	17.5308	20.9566	22.6673	20.292	23.589	28.5808	26.9809
prdm10	8.41722	10.6443	12.4412	15.0051	18.2386	21.8114	19.4555	10.6623	11.2675	13.0384	10.2837	7.88408	8.72467	6.89309	5.38787	4.58825	4.34949	3.64979	4.526	4.4733	4.19804	4.16263	3.94377	prdm10						Metabolism				Primary metabolism
fgfr3	8.32116	11.601	11.8302	12.9199	16.9397	24.6164	24.6585	16.8172	20.2492	21.159	42.5864	48.4779	36.1277	32.3597	29.224	29.2253	31.5062	41.2038	35.9452	35.6908	31.9516	43.0544	37.201			Cell cycle			Intracellular signaling cascade	Metabolism		Negative regulation of apoptosis		Primary metabolism
atp7a	7.8713	8.5587	10.7301	10.9058	18.0797	29.0376	24.6235	10.0562	4.7938	2.44522	3.83815	2.80823	4.25394	4.01846	2.82219	4.1356	4.04063	5.79754	6.43674	5.56772	6.78509	8.59407	6.48106							Metabolism				Primary metabolism
itfg2	7.13659	9.90907	10.9386	9.15838	17.7455	28.5642	23.0016	17.4047	6.68378	4.94884	6.72801	5.55567	5.26806	7.74472	7.45606	13.5146	11.725	22.3719	22.3456	17.7592	23.1198	22.9024	20.987	itfg2
nt5c1a	8.30184	11.4688	12.7089	13.4784	20.4285	16.4964	11.261	15.9628	24.3628	44.7937	96.4227	120.036	109.221	137.629	125.611	110.055	101.263	64.7628	50.1193	47.6466	46.774	46.8103	48.5674
ier5	4.61768	5.66472	7.14224	12.4194	20.1077	32.8687	183.128	238.458	245.33	302.262	186.259	222.764	164.817	134.022	120.583	121.88	95.5033	98.3495	84.9618	97.399	67.9065	65.8096	58.5216
gpatch1	7.48602	11.8739	11.8506	12.9894	18.0726	20.4894	22.1889	13.6151	7.60004	6.76258	4.64352	4.38479	4.8488	5.52455	4.6302	4.91076	5.02029	3.09631	2.9657	4.37343	3.45748	2.5877	2.39547
smg8	7.17458	10.3749	8.5927	10.242	15.5768	28.1255	26.831	17.8528	15.3822	9.81787	8.90702	9.01505	8.44631	7.74438	8.60353	8.15313	7.27436	9.47707	7.91288	7.29362	6.24245	6.74205	5.94427	LOC567424
wdr36	5.8029	7.79768	8.32786	10.4902	18.227	29.1801	25.0198	23.569	20.7425	23.2115	21.1216	20.9059	27.2832	34.3385	29.6078	28.8421	29.3902	23.4191	20.8133	14.2365	15.5269	11.4991	10.253	wdr36						Metabolism				Primary metabolism
rnf31	5.83823	8.73221	8.77007	10.8788	16.1895	27.9359	32.726	25.2441	11.5975	6.9784	9.68494	7.07221	8.13797	10.03	9.54604	9.09327	9.03351	9.29887	9.73311	10.7185	13.8445	12.5257	14.8715	rnf31						Metabolism				Primary metabolism
nfatc3	6.82898	10.3982	8.46464	9.3656	16.0299	26.0873	30.2474	25.0814	14.4672	8.39498	5.24805	4.62567	3.12255	3.68239	3.38515	4.9913	4.58311	3.63466	3.89837	5.10764	4.94707	5.47445	4.98949							Metabolism				Primary metabolism
klf9	7.75999	8.23327	10.5596	15.7556	17.8842	16.4477	11.9687	7.9582	4.90378	5.30756	1.60908	3.79467	4.17204	4.8131	4.91368	4.96952	4.1656	5.70925	5.69087	6.66747	7.46198	7.11493	7.58715							Metabolism				Primary metabolism
cpsf2	7.51921	10.092	10.1759	12.7888	16.9743	17.5415	31.3335	31.5354	20.0177	15.4822	11.1164	10.1101	10.2549	14.3566	11.9625	13.7268	12.8176	11.6861	12.0938	10.146	8.19393	7.48139	7.91663	cpsf2						Metabolism				Primary metabolism
rps6ka1	5.54485	6.07539	8.66019	9.21996	16.5389	28.7333	33.9965	25.6889	14.7455	7.71268	6.65557	4.63107	5.55701	9.52731	10.6254	15.9641	15.7671	11.9332	13.7541	10.9538	13.0212	14.5815	13.0441	rps6ka1		Cell cycle			Intracellular signaling cascade	Metabolism				Primary metabolism
mypop	7.75575	9.40061	9.45765	10.4895	15.5372	21.8329	26.1538	33.2577	42.1176	46.7496	32.1112	27.6728	26.2222	26.074	23.234	22.3384	20.1586	20.2456	15.8989	15.5533	16.9248	14.2167	15.1408
taf5l	3.75787	7.32126	9.21721	10.105	18.0312	25.7807	29.5105	31.5078	24.7606	18.7953	18.4851	13.8974	10.5309	11.4273	13.0966	10.5324	10.7543	6.49312	5.3488	3.38827	4.70012	4.54717	3.37124	taf5l						Metabolism				Primary metabolism
tmem189	6.24746	8.25416	8.37353	10.0851	14.3214	26.5127	25.4322	13.8498	5.19839	1.59282	3.79058	3.87505	5.00348	10.4208	9.08371	6.47785	7.13157	6.37612	6.80471	6.63578	8.01059	9.58769	7.3825			Cell cycle				Metabolism	Mitosis			Primary metabolism
atf7	6.67633	10.2218	11.4403	12.9061	15.637	16.8758	15.5166	4.26985	2.44211	3.81489	5.66136	5.71842	5.73603	8.8129	6.45259	7.21861	7.95251	7.97606	8.80248	10.3271	9.94573	11.106	10.0217						Intracellular signaling cascade	Metabolism				Primary metabolism
LOC548794	6.63429	9.14431	12.2478	12.2452	15.1447	17.9437	20.7078	15.581	13.1096	14.9541	11.8059	8.81333	9.12386	11.2409	6.96571	8.46433	9.65414	2.97872	3.9628	1.67139	5.62891	3.7699	3.21989	wdr33
bysl	7.4219	7.81029	10.0387	12.582	15.0194	19.0462	11.7282	14.7625	26.4136	33.9203	44.7844	52.0766	56.2922	82.1532	83.1824	68.0299	76.1198	64.4299	59.322	47.4894	45.2623	37.121	41.876	bysl
fam107b	4.85953	7.98938	7.97934	8.39925	14.8252	25.7623	25.757	19.9524	9.23636	2.1704	4.34336	8.8433	9.8568	13.6131	10.9352	9.5772	10.0736	9.21305	10.7811	9.08286	9.19003	9.14427	7.18626
LOC100144954	4.47007	7.69913	7.92594	8.00927	14.9087	26.671	20.3511	13.8938	10.5218	2.82544	1.2826	1.6809	0.917463	1.85022	2.00001	1.65035	1.44433	2.86777	4.29102	3.22126	5.36343	7.51623	7.71249
foxo3	6.09516	6.67368	7.97588	9.32321	13.156	26.3751	25.7459	10.7777	3.93197	3.36122	5.56945	6.37649	7.1395	8.13879	7.91515	8.23371	9.46389	13.3286	17.9799	22.3623	18.6419	21.5653	24.1225	foxo3a		Cell cycle				Metabolism				Primary metabolism
jmjd5	4.36799	9.49705	10.8244	9.25509	13.4629	21.7275	17.2216	4.85747	1.56286	0.397175	0.311414	0.633517	0.519965	1.21065	1.34889	1.51786	1.06975	1.56974	1.83064	1.49167	2.37405	2.59057	2.74023	jmjd5
narfl	6.14205	7.73732	8.09192	8.93164	12.3114	25.4252	32.4808	22.9221	14.4583	4.36872	14.2325	9.3617	12.9793	16.8503	18.7447	19.8824	23.7927	24.8503	23.3089	17.4697	25.1013	20.9123	22.0167
serhl2	4.17921	6.95676	8.28088	11.2315	12.0387	25.8284	18.6648	8.45267	3.08687	1.23023	1.72191	0.780242	1.8475	3.86492	4.77342	7.85348	11.0327	14.3212	17.25	7.92038	12.7909	18.225	12.0886							Metabolism				Primary metabolism
wwtr1	5.56702	8.28573	7.77141	9.44646	14.3524	22.9468	15.8899	20.2391	31.3464	51.9192	65.4652	88.6132	71.4472	83.1115	61.0842	63.6801	68.0133	78.4965	78.5412	108.115	98.7285	92.0279	117.29							Metabolism				Primary metabolism
pmpcb	7.19893	8.49754	7.88062	9.83138	14.9702	19.438	21.8193	16.3494	13.7108	12.2606	16.088	12.9653	15.8751	24.1878	22.0902	25.5663	29.7163	24.2221	25.3197	25.1164	29.7122	28.4222	27.0579							Metabolism				Primary metabolism
atg2a	5.00065	7.66829	7.5565	9.38933	13.9395	23.457	30.5923	20.1103	13.4226	7.82605	9.87994	9.15203	10.4762	9.47785	10.5391	10.3436	11.0534	12.9191	14.9902	12.3337	14.6779	16.2641	16.5272
ccdc51	5.27107	7.92017	7.83467	7.015	11.1904	26.6575	20.2756	10.2197	4.46752	3.03598	4.87635	5.21734	4.6521	6.03591	6.1741	7.9861	9.27491	13.6111	12.521	10.802	13.7598	13.3695	18.7389
akt2	3.87517	4.44971	6.57585	8.13411	11.9971	30.0587	37.141	39.3961	33.8361	32.1892	34.3617	36.3274	35.3022	38.5197	34.5328	28.7996	32.7173	27.5106	23.801	22.2557	23.571	20.7347	21.119			Cell cycle			Intracellular signaling cascade	Metabolism	Mitosis	Negative regulation of apoptosis		Primary metabolism
abhd4	6.01325	8.29916	7.92171	10.471	12.3155	19.1974	18.1351	18.0101	9.94919	5.8405	7.08178	5.95453	6.46481	13.3268	11.3261	12.9057	18.4784	12.8383	12.6846	21.2216	27.4682	19.1911	31.4208	abhd4						Metabolism				Primary metabolism
nr1h2	5.33141	6.10754	8.97714	9.19369	13.2969	20.1259	21.7878	9.82454	4.67111	3.44468	6.84177	7.64058	10.9253	21.0855	20.9683	25.7342	26.7764	30.9413	32.775	28.1189	31.4932	38.9978	37.4966	nr1h3
rad54b	6.16719	7.14774	7.56871	10.1237	14.7454	16.8031	21.5542	17.9917	10.2875	4.64913	1.71576	2.04713	2.37578	2.29155	2.5979	2.37658	3.25342	3.16282	2.85904	2.29079	2.93749	3.05445	2.61888							Metabolism				Primary metabolism
hs3st1	4.86221	4.30068	5.20037	8.0898	9.78122	30.0896	18.8167	2.61639	0.609327	0.347569	2.34477	0.551508	1.41923	2.20455	1.87502	1.86499	1.77696	1.05852	0.717226	2.05124	1.67174	2.38112	1.59791							Metabolism				Primary metabolism
c19orf66	5.78612	8.01469	7.42978	11.1707	12.956	16.964	14.066	2.52802	1.48673	1.18726	4.76525	4.61211	5.69673	6.84186	6.34325	8.23193	7.93287	7.26009	7.74028	8.71887	9.95784	13.7394	17.917
tstd2	5.62039	7.05048	7.97715	10.2151	12.7354	18.4263	17.796	14.181	9.19605	4.76338	4.5229	4.78937	5.81645	6.09502	6.29028	6.22088	6.00423	4.95233	4.20591	2.63946	3.5711	4.03042	2.82814
dusp11.2	5.03112	4.637	6.17402	9.29253	12.9355	21.8103	16.3826	12.9763	11.4106	7.79852	7.19649	7.39558	6.73496	6.70248	7.11125	5.98495	4.84515	3.77744	4.0417	3.72525	3.69128	3.01497	2.77741							Metabolism				Primary metabolism
ercc2	5.31799	8.32122	7.86704	8.01394	12.3757	17.845	18.731	12.4722	6.49149	5.82778	10.1291	9.03406	11.1909	12.5704	11.2226	11.6845	11.6333	9.14073	7.55732	6.375	7.38967	6.31587	4.1968	ercc2		Cell cycle				Metabolism	Mitosis			Primary metabolism
stk25	3.92492	7.9889	6.81509	8.96854	12.2447	13.0257	16.2763	18.0836	17.964	15.5123	13.6384	18.1048	12.4979	10.0078	11.2309	15.6713	22.6908	38.6359	56.8305	54.0446	50.4888	76.9837	52.6496	stk25						Metabolism			Phosphate metabolism	Primary metabolism
mfn2	5.03257	5.97313	5.06026	8.41343	10.3917	17.7821	16.7518	8.13648	3.21214	1.53529	1.34216	0.886513	1.44088	2.9138	2.47659	2.76054	3.41877	3.10611	4.13794	3.15765	4.24009	5.93695	4.56161
ccdc132	3.87823	7.11757	7.60778	6.67903	10.6021	16.4916	15.7481	8.24075	2.94728	0	0	0	0.910011	2.09351	1.44307	3.09437	3.3134	4.08027	5.88398	7.93173	6.6132	7.86069	5.14751	si:ch211-287b5.1
zadh2	4.06467	7.99712	7.19016	11.7791	9.80266	11.19	46.6197	33.8224	37.3374	18.3862	29.324	22.5676	28.6984	29.303	29.7023	29.3995	20.9647	29.6161	19.5818	25.478	23.9201	27.2071	23.6864							Metabolism				Primary metabolism
c7orf25	3.88669	4.96688	4.6303	6.19094	11.6086	19.7044	17.5703	8.5485	4.0469	2.70094	3.03094	2.31619	3.19211	5.18804	5.33894	6.17456	5.05672	3.53965	4.31365	5.39064	6.0761	7.22312	10.0587	zgc:55781
ptgr1.2	3.65462	7.26544	7.4553	9.54543	11.1163	11.504	7.09256	7.16296	6.36783	8.84244	1.65261	4.33775	2.02603	5.27875	2.57699	3.2373	2.33236	2.66055	4.91029	5.88912	4.15358	6.4622	9.72168							Metabolism				Primary metabolism
nipal3	5.08333	5.86559	6.77012	9.70291	10.185	12.8342	17.1309	11.8142	6.27506	3.53875	7.23633	6.93501	7.76478	6.13293	4.74641	4.71057	3.56317	3.11684	2.89209	2.84789	2.68882	2.27423	2.28795
pus10	4.18607	3.96317	9.15004	8.03305	12.3495	12.3968	13.7908	9.78775	5.2126	3.14317	2.55061	1.89327	5.14059	5.80096	8.43665	5.81501	5.15307	3.18067	2.97532	2.40904	2.26605	1.96957	3.61146
pcyt2	5.24379	6.87517	5.75285	6.96142	10.8128	13.9653	17.1348	13.899	17.6105	15.0601	27.7566	15.0613	20.9428	24.1588	25.0705	29.7066	37.5282	30.3839	39.6411	29.0881	45.3135	48.033	40.0418							Metabolism				Primary metabolism
mcm8	3.81557	5.796	7.69159	7.33049	9.51784	14.1772	23.5794	22.6853	23.8664	10.3574	13.7009	8.05288	10.3871	12.9301	13.7978	11.2876	10.5381	11.8141	10.8674	8.07239	7.62076	10.0771	6.11228			Cell cycle				Metabolism				Primary metabolism
pik3r4	4.22064	5.23966	5.98408	6.70517	9.19509	16.8547	19.3471	13.9632	8.36942	2.95389	4.46667	3.35415	4.74464	5.80856	5.31025	5.46481	5.83676	5.73776	6.29603	5.23978	5.60845	5.94599	7.0209	pik3r4		Cell cycle			Intracellular signaling cascade	Metabolism		Negative regulation of apoptosis	Phosphate metabolism	Primary metabolism
rab21	3.43848	4.12673	4.51263	5.72049	7.31076	22.8617	25.9192	9.70532	1.64961	0.737445	0.573443	0.4872	1.23053	2.1339	1.88774	2.36024	2.92048	3.27306	4.05507	4.94561	4.57062	5.76893	5.08516			Cell cycle			Intracellular signaling cascade
nkrf	2.82969	3.21358	4.9744	6.58114	8.82214	21.4523	25.701	13.5667	8.30942	8.44459	6.39913	6.14961	6.37193	8.98727	7.77306	6.83082	6.50849	5.0159	4.87126	3.84288	4.49652	4.15705	3.5849							Metabolism				Primary metabolism
urb1	3.82007	4.59209	5.66371	6.53266	8.62785	16.7343	20.2524	19.421	13.3174	10.3501	16.2054	16.9368	18.3285	23.2067	20.6259	19.7747	21.2611	17.7726	13.0566	7.81283	8.76915	6.58705	5.81993							Metabolism				Primary metabolism
tada1	3.71886	4.60401	6.07345	9.10579	9.04629	13.0238	24.1467	17.1739	10.8575	5.83125	10.6107	4.8191	4.82978	5.33328	5.61551	5.15102	6.27606	3.68119	4.43399	3.1951	3.38937	2.91133	2.78046
hsdl2	3.64686	4.84059	6.20761	5.80939	11.0859	12.8869	15.2417	12.0938	13.1882	11.4541	5.53481	4.75197	4.46869	4.95467	4.10984	6.27012	7.39217	9.42827	17.317	17.1308	25.2072	31.4521	30.0616							Metabolism				Primary metabolism
ccne2	4.60983	5.2903	6.62885	7.19179	10.1597	9.13018	87.5156	156.437	86.6691	50.9862	33.521	16.9257	18.8238	17.5745	16.1047	14.8891	16.0803	13.7596	9.19298	7.5605	6.30973	6.16582	4.71298			Cell cycle					Mitosis
ralgds	3.93015	4.33166	4.1363	5.08571	8.83126	16.2648	20.4172	28.8399	31.4031	41.2017	29.5213	31.6661	28.7023	28.1729	25.697	27.7494	26.7238	31.05	33.8193	34.4695	36.929	39.9736	36.3203			Cell cycle			Intracellular signaling cascade		Mitosis
ifngr1	4.07967	4.10336	5.68297	8.14288	9.25573	11.1125	9.43179	6.40035	5.01054	3.71069	7.53523	7.67292	6.68695	7.84583	9.33975	9.50556	8.19446	7.50317	7.22766	7.61506	7.34315	6.35011	8.79822					Immune response	Intracellular signaling cascade
c18orf8	3.21494	6.08269	5.22742	5.10854	7.71285	14.8229	13.5055	8.22587	5.51419	1.38867	1.48846	1.04846	2.0482	2.85376	3.0947	5.06326	4.89092	5.14028	6.10994	6.5879	8.0257	8.73555	8.44575
toe1	3.48114	4.28903	4.02169	8.5468	9.29587	12.142	13.0354	11.5643	8.69629	8.70566	7.11273	5.60917	6.53138	10.0597	7.51736	7.21448	8.67431	5.14919	5.28096	4.75204	4.90555	3.18252	4.17792							Metabolism				Primary metabolism
hpdl	2.70998	4.57262	4.22145	7.17243	8.91534	13.0909	78.2506	240.841	203.289	116.617	3.74538	2.36801	1.48495	1.60975	1.42062	1.44634	1.68875	2.41938	2.09743	1.24652	2.16714	2.24014	2.44893		Amino acid and derivative metabolism					Metabolism				Primary metabolism
c20orf72	2.06668	3.41697	3.23911	3.21114	9.65129	18.423	18.1175	8.18682	2.47959	0.964687	0.324036	0.219756	0.386449	0.629942	0.842139	1.50789	1.80256	1.5282	2.23845	1.99638	2.99627	2.79748	2.73351
c3orf75	3.27704	4.89327	5.64768	6.05625	7.86461	10.3842	12.5598	11.1703	12.1885	5.73839	6.87311	7.89702	9.31939	9.08282	10.3852	10.2795	10.1467	16.3265	16.2338	13.5245	14.4932	15.0671	10.071
prkcz	3.41987	4.29631	4.66565	5.82747	7.5441	11.8317	8.01403	1.98333	0.796512	0.541367	5.97562	5.47551	6.5927	5.80078	5.81502	3.35004	3.05586	3.01862	3.26308	3.9442	4.40785	4.7342	5.45706						Intracellular signaling cascade	Metabolism				Primary metabolism
LOC733709	1.9928	2.64329	3.05108	5.80174	7.41491	16.529	11.5349	13.8033	29.3782	53.977	28.2979	29.9394	24.8852	16.281	9.87296	5.36933	3.34388	1.32765	0.856687	0.802568	0.472954	1.18826	1.28938
mapkapk5	4.01297	6.17825	4.99124	6.2547	8.03815	7.72147	6.87101	4.13736	6.20685	8.11684	7.50435	8.8899	4.49056	5.72013	4.82258	4.04187	3.88979	2.86511	3.01054	3.51199	3.19027	3.21413	2.10713			Cell cycle	Cytokinesis		Intracellular signaling cascade	Metabolism	Mitosis			Primary metabolism
znf410	3.49406	3.8949	3.8031	5.35569	8.11047	12.1626	16.5921	11.6077	6.70002	5.0162	5.84173	4.49968	5.41569	7.22245	6.85495	6.40762	6.85763	4.66068	5.14888	3.81022	4.13264	2.66665	3.01391							Metabolism				Primary metabolism
dcun1d1	1.72765	3.82524	2.94297	4.64585	8.42755	13.9399	17.4667	15.8387	9.7637	6.55251	3.72303	4.36175	4.44003	5.32446	5.395	4.7261	4.92962	5.61518	4.72654	4.98365	4.33823	4.51617	3.60152
adora1	3.83993	4.0328	5.63484	5.16002	8.29571	8.40522	6.76458	1.47849	0.560968	0.240193	0.373704	0.666676	0.668279	1.09249	1.7482	2.18203	2.39388	1.82803	1.98173	1.5464	1.82338	1.58593	1.0352					Immune response		Metabolism				Primary metabolism
atp6v1g1	1.80949	2.12243	6.74173	7.54825	6.96486	9.98594	7.28024	8.77922	5.79261	7.86358	7.79285	4.47167	7.85956	11.306	12.8665	14.7225	11.2192	18.5558	22.0457	23.3641	21.8892	14.7667	28.108							Metabolism				Primary metabolism
slc9a3r2	3.49949	4.57172	4.54903	4.83526	8.02769	8.85724	7.27393	3.2194	8.2614	12.7651	13.8018	15.5668	11.9353	12.195	10.9935	12.1592	14.5417	14.1072	15.5126	19.1771	20.3762	19.7202	19.7012
acsf3	3.09745	2.7446	4.2983	4.26472	7.00487	11.9373	9.50545	7.44342	3.76307	1.27229	0.347533	1.06002	0.839388	1.19689	1.94189	2.25029	2.98208	4.06642	6.58546	7.123	6.2114	10.2248	11.6414							Metabolism				Primary metabolism
znf333	2.31857	4.44591	4.14446	6.23306	7.23319	8.90605	7.78276	5.27266	1.24748	0.579966	0.150905	0.153687	0.377863	0.480709	0.156875	0.251314	0.519588	0.737285	0.266478	1.24465	0.66189	0.924475	0.333352							Metabolism				Primary metabolism
MGC147631	2.5388	3.21036	2.5936	5.68799	6.2661	12.7063	13.6656	11.9605	12.1478	7.89228	4.81937	3.75243	3.19451	3.46076	2.79972	3.96408	6.34183	7.47713	12.3244	15.3314	15.9527	25.9134	35.1974
epm2a	2.8232	5.4102	5.04378	4.84771	6.77668	7.80614	4.38505	2.2955	0.550161	0.70636	0.183228	0.0933835	0.0655331	0.389519	0.285716	0.183372	0	0.358472	0.161925	0.568458	0.178781	0.518361	0.20296						Intracellular signaling cascade	Metabolism				Primary metabolism
sult2b1	2.42594	3.57429	2.75058	3.86293	8.28347	11.4258	8.22198	4.14368	1.41365	0.404722	0	0	0.0749004	0.222812	0.435461	1.46912	2.78966	3.07591	4.16767	8.46835	10.9427	22.5261	26.9749							Metabolism				Primary metabolism
srd5a3	1.66163	2.44791	3.67343	5.45688	5.31932	13.5248	7.91473	1.41843	0.403163	0.415834	1.50556	1.2068	2.15357	5.03464	4.13638	4.16785	5.09424	5.16012	5.70729	5.57746	4.9368	7.20411	6.92864
dlgap4	2.87755	4.34907	4.61675	4.98521	6.0219	7.48131	5.95698	7.06096	9.26773	10.9852	23.1335	26.6117	29.4466	34.6847	33.5021	33.6802	31.3216	38.1859	41.6674	43.9944	41.472	40.9151	38.4712
kiaa1958	2.63956	3.64766	5.00313	4.66433	5.36177	8.02095	4.17102	0.765064	0.552887	0.815082	0.794435	0.807154	0.831025	1.87643	1.04821	0.952545	1.37659	1.36932	1.85683	2.06165	1.66294	1.81152	1.2723	KIAA1958						Metabolism				Primary metabolism
slc20a1	2.17051	2.61654	2.75284	3.34756	5.58012	12.6535	58.2846	86.1394	160.335	138.473	150.599	112.402	133.691	164.917	174.023	187.773	200.279	206.919	163.406	248.528	155.059	161.988	149.401							Metabolism			Phosphate metabolism
capn7	2.92576	3.21436	3.23068	4.82631	5.95116	8.95854	9.93786	7.68969	5.18945	1.93125	1.74564	2.28886	3.78051	6.42668	6.11266	5.21806	4.77637	4.79359	5.46658	5.08668	4.60303	4.36853	5.65313						Intracellular signaling cascade	Metabolism				Primary metabolism
med11	2.54377	2.5756	2.84836	3.69221	6.15988	10.3894	8.35473	4.69909	7.87485	8.23823	10.4576	8.50769	11.7016	13.4023	12.9468	12.9796	11.332	9.22605	9.05136	8.2876	9.98953	8.14607	7.73204
atox1	1.36458	4.74888	4.11993	4.85682	3.95743	8.74862	6.57864	3.92552	5.40491	5.4975	7.9016	10.288	16.8929	18.3173	18.4818	19.5378	15.7112	26.3117	19.1992	24.3262	20.7832	16.0537	28.2828							Metabolism
spcs2	2.24646	3.11837	4.25449	6.03454	5.85752	5.61721	3.65589	6.39285	8.28173	11.086	17.147	21.1878	19.37	23.8227	21.1837	27.1108	23.7059	25.215	27.282	27.6695	27.4581	28.27	32.1177							Metabolism				Primary metabolism
cndp2	2.90496	2.76745	4.79134	5.00514	6.00702	5.35516	11.6515	11.3689	19.6829	21.0204	94.4003	55.466	78.7421	70.6998	83.1974	85.2569	82.1672	36.5344	48.6265	25.195	44.9366	33.3366	33.3494	cndp2	Amino acid and derivative metabolism					Metabolism				Primary metabolism
dusp23	2.00261	3.73997	3.63513	5.18333	4.27253	6.97327	8.40957	6.97581	6.25157	2.22672	2.08132	1.23723	1.17869	1.47441	1.44244	2.3133	3.24553	8.56525	10.3434	13.2609	12.5193	16.1897	13.8207			Cell cycle				Metabolism	Mitosis		Phosphate metabolism	Primary metabolism
ttc39b	1.3649	1.81343	3.4879	4.28229	6.02471	8.81073	10.5858	8.46355	3.74547	1.84305	1.71218	1.03414	1.49319	4.99268	5.2285	7.54037	7.87837	7.30892	6.88887	9.66874	10.6238	9.32236	15.4235
prtfdc1	2.1478	2.65194	3.93703	3.07506	4.54213	9.09609	6.06442	3.92268	5.17836	3.0126	10.2371	9.46201	21.127	31.7398	38.7922	44.0464	49.3301	36.1963	30.6229	32.5553	33.186	27.4729	24.4624							Metabolism				Primary metabolism
fam69b	2.41931	3.17686	4.21569	3.77622	5.58723	6.03362	4.07288	2.27555	1.03578	0.582413	0.211426	0.644594	0.428729	0.821066	1.13559	1.02886	1.86451	5.42578	6.51898	10.3841	7.53643	7.92669	11.6707
cep44	1.71613	2.84684	2.62865	2.69086	4.73663	10.2822	6.36684	1.21334	3.70686	4.07857	4.18253	2.47167	3.17158	4.53237	3.0436	2.95571	2.96492	2.28996	2.21676	2.59131	2.36576	1.97156	1.29539
c4orf29	1.23148	1.30683	2.76545	3.53019	6.14888	8.62559	6.11544	4.55012	2.15757	1.84881	1.15006	1.85651	2.81063	2.75122	2.29148	2.49476	2.07839	2.34441	3.72749	4.36439	5.05103	6.1465	7.01177
nprl3	2.1613	3.0075	3.47083	2.62906	5.77797	5.97868	5.71807	5.57781	4.09269	2.47089	4.11025	3.38306	3.37348	4.68086	4.64987	4.58365	5.46249	5.84147	7.19875	7.20847	6.5921	9.33815	8.92234
rgs9bp	1.63576	2.16896	3.61644	4.15114	3.66546	7.28532	8.054	7.26297	15.7231	14.7366	20.1203	14.3671	14.9206	14.0829	14.9716	12.0275	11.703	13.8941	11.7074	7.46708	14.6859	17.784	14.3471
mob2.2	2.07402	2.93624	2.3299	5.20348	5.37576	4.58845	2.98026	8.00203	25.9555	44.5162	43.5325	38.7426	28.1325	23.9798	21.5338	24.1069	20.9464	18.9039	21.1536	29.0613	22.801	27.0019	27.9111			Cell cycle	Cytokinesis				Mitosis
nsdhl	1.97562	3.06106	4.37384	3.83645	4.26615	4.85754	5.69728	3.22703	1.74413	0.576451	0.515327	0.852345	0.506983	1.16197	1.94197	1.28596	0.949508	1.13216	1.76204	2.25332	2.50964	2.731	2.69834							Metabolism				Primary metabolism
acacb	1.57426	1.55165	1.79028	2.79273	3.89166	10.3939	13.2705	9.82493	4.86788	3.32234	7.09777	7.31715	9.99364	10.7058	10.2209	12.9854	15.082	15.7091	19.1734	17.0846	20.8057	19.3256	20.9407							Metabolism				Primary metabolism
perp	0	3.41153	4.73851	4.01751	4.15317	5.54726	6.61761	7.17394	13.3103	11.768	33.7161	29.0629	34.8093	29.7184	25.8263	22.7641	19.1571	15.1284	13.8767	10.2846	13.2635	14.5413	11.642
ddx11	1.71914	2.06123	1.96488	2.35742	4.85085	8.76777	13.1907	8.9034	7.66472	5.15763	7.70911	6.22061	7.79222	12.7982	12.5582	11.0272	12.2707	10.4204	7.42335	8.13893	9.69925	5.46145	6.71659			Cell cycle				Metabolism	Mitosis			Primary metabolism
ttc39a	0.968004	2.08222	2.12023	2.72713	4.5117	8.28898	6.26099	1.50044	2.6518	5.32535	12.7919	8.21588	8.41655	4.82809	3.26816	1.9098	1.75596	1.11068	1.43403	0.779235	1.26621	1.83778	2.02786
tyr	2.01078	2.96851	2.87759	3.24453	4.37344	4.94484	5.29628	4.01827	1.34517	1.20674	0.420468	0.534624	0.413706	1.50464	2.56798	7.40624	20.4289	57.5867	71.0491	103.592	92.6372	68.1583	74.1208		Amino acid and derivative metabolism					Metabolism				Primary metabolism
senp6	0.597673	1.57746	1.2147	4.27417	6.32614	6.04716	7.49464	5.70148	3.88482	2.39747	2.27197	1.86614	1.46081	3.65402	2.36185	1.3823	1.81532	2.01853	2.02319	1.92923	2.46025	2.36767	0.515778							Metabolism				Primary metabolism
ddah1	2.06514	2.54422	2.73982	3.1901	4.32772	4.69309	4.51252	4.1163	3.99839	3.36436	1.47904	1.79259	1.58811	2.74584	2.57305	3.63844	3.82257	4.78835	6.3747	7.56918	7.54619	8.6307	10.0936
trip4	1.62492	1.21805	2.04454	2.12902	3.83784	8.2997	9.70324	9.30762	6.42448	5.31317	4.31527	4.18918	5.4742	9.82463	9.12492	9.54696	9.52677	9.85348	9.25181	8.85384	8.2546	7.75755	6.46912
smyd4	1.38953	2.9362	2.73245	2.87496	3.69171	4.73207	4.90327	1.38341	0.664198	0.427579	1.00764	0.554881	0.60093	0.667298	0.611045	0.724847	1.19384	1.10523	0.407009	0.430143	0.735009	0.474309	0.368793							Metabolism				Primary metabolism
kdm4c	1.53871	1.43582	1.9053	3.05005	3.49582	6.8729	6.07414	2.77171	3.53147	2.79378	2.35814	3.82075	4.12816	4.3192	3.84279	3.97423	4.58854	3.29112	2.83485	3.06309	2.29197	2.57913	2.09562	jmjd2al
crebl2	0.788518	2.61677	2.01344	1.5898	3.59535	7.45078	3.49648	7.20471	12.1446	17.9492	14.1608	16.9314	14.3704	12.2592	12.6409	13.4854	12.5699	11.5072	13.4555	12.699	15.0042	15.4508	18.5359
slc7a6	1.57905	2.0973	2.25906	2.406	3.48544	5.67834	6.75825	5.94841	6.37016	6.1605	8.28265	9.3099	10.7471	11.5414	8.35331	7.60748	6.92265	6.51712	7.79827	2.66963	4.93587	6.75462	3.81393		Amino acid and derivative metabolism					Metabolism				Primary metabolism
pabpc4	1.43005	2.30325	1.46188	2.91356	2.86911	6.47414	4.82477	4.70443	5.41216	7.21673	17.1312	15.2463	22.9489	34.7029	32.6497	35.0027	33.8747	32.6789	28.9064	24.6969	23.9153	25.3993	25.7926			Cell cycle				Metabolism				Primary metabolism
cdc42ep4	1.30198	2.422	2.9281	2.45103	3.3731	4.68272	14.0563	79.0164	90.3735	62.5078	36.5596	27.0061	29.2673	27.6085	25.7443	24.2973	29.465	24.0099	22.466	20.5415	18.2363	18.0318	15.6109	LOC100002938
acy1.1	1.86708	1.85784	2.85918	3.13631	3.80937	3.22659	2.67732	1.79796	1.70581	2.56925	1.09072	0.833804	1.23534	1.35252	1.51182	1.03086	2.95527	3.11179	5.38159	7.33079	8.42486	7.62831	11.6775		Amino acid and derivative metabolism					Metabolism				Primary metabolism
arhgap6	1.49106	1.58571	2.03312	2.49555	4.10065	4.95108	4.41867	2.98623	2.70805	3.47924	3.28151	3.05759	3.07537	2.06927	1.462	1.84123	1.26367	0.83777	1.03267	0.880028	0.645781	0.992887	1.11466						Intracellular signaling cascade
c4orf43	0.461241	0	0.939041	2.06326	5.3215	7.21776	5.41287	10.2757	5.41193	5.77741	3.18456	4.89129	5.56392	8.13053	7.90851	10.1164	10.5487	9.05101	11.7826	6.32295	5.55491	5.85632	3.97989	zgc:110664
ras-dva	1.24461	2.75651	2.79928	2.23153	3.22436	3.32869	5.04119	11.714	9.08139	7.84238	27.1494	33.0237	22.9224	17.3919	15.3808	10.5771	7.18658	5.62028	4.60629	7.01277	4.70369	5.24175	9.6623
cish	1.57223	1.58949	0.687979	2.01231	4.31277	5.38259	3.65274	2.30836	7.29491	11.2385	21.8813	19.088	22.4772	26.9727	27.9333	25.2754	18.1034	12.0688	8.19712	11.7578	8.96468	17.9907	17.6322					Immune response	Intracellular signaling cascade			Negative regulation of apoptosis
c11orf73	1.36366	1.5053	3.12811	3.66269	2.94782	2.82623	2.74654	4.52175	2.76261	2.56042	3.95453	4.4435	5.37258	10.2546	7.26272	6.18024	5.60738	9.82628	10.5079	6.59359	8.76901	11.8252	7.94155
cyb561	0.962622	2.55401	2.21098	3.44945	3.23499	2.88336	37.9377	153.809	199.257	245.309	222.018	179.728	152.645	129.862	116.667	135.717	110.881	81.7518	73.0267	60.0878	58.8726	51.4176	51.2797
c18orf19	1.38432	1.22446	2.35552	1.44692	3.76581	5.10366	5.62554	5.80724	3.44099	1.26994	0.718971	0.549591	1.09289	2.19688	2.05539	3.17741	2.92176	5.09837	5.24137	3.7164	4.99776	3.98301	4.37882
pigu	0.497584	1.41112	1.11948	1.42765	3.53248	7.15969	11.1553	5.41221	2.1512	1.69184	2.73767	3.6176	4.33837	5.63478	5.24474	5.42611	4.56205	3.77423	4.06642	3.60421	4.25938	4.27056	2.83273
rac3	0.977095	1.15074	1.66059	1.45813	2.81598	6.60074	4.32702	2.16201	1.60472	0.978367	3.78186	2.05972	2.25362	4.02871	4.32461	4.64129	7.72759	9.02278	11.1621	20.4709	28.1076	39.7519	44.9597			Cell cycle	Cytokinesis		Intracellular signaling cascade	Metabolism	Mitosis			Primary metabolism
btbd6	1.36005	1.09535	1.26403	1.55178	3.55899	5.47327	4.94868	2.94133	11.1043	20.1568	23.8673	25.9499	22.495	23.0372	19.3651	19.5326	18.6576	16.561	15.2252	16.6202	17.653	22.5199	21.5436							Metabolism				Primary metabolism
ifit5	0.484418	2.14203	1.73072	1.95282	4.18616	3.79486	25.3362	37.6709	41.1781	30.6649	57.3183	35.752	49.0242	48.1072	44.7874	43.348	42.3694	43.2585	37.2463	38.8218	42.5965	43.4766	54.9539					Immune response
atp6v0e2	1.22603	2.15679	2.49128	2.19174	2.94961	2.81903	2.84366	0.922472	0	0	0.931181	0.239087	0.66521	1.99754	1.21002	2.04697	3.25691	4.59787	3.73265	6.92623	9.85795	7.27943	4.76123
rabl5	0.869307	2.04868	1.47808	2.0761	3.06142	4.00483	3.58495	4.44887	3.79199	2.75583	4.27217	4.93312	5.54788	7.77787	4.20743	3.68282	2.44212	2.6431	2.88464	1.63416	3.18552	2.22797	4.49984			Cell cycle			Intracellular signaling cascade
rbm18	1.11896	1.48558	1.33354	1.67124	3.04312	4.64213	3.84751	3.26617	1.69775	1.7726	0.437163	1.63226	2.08509	2.24325	1.5906	1.60129	1.57649	1.49485	2.12262	2.10229	1.56211	0.823976	1.12614	rbm18
paqr5	1.5817	1.39915	2.07633	1.21465	3.47102	3.54055	5.61957	2.32206	2.11543	1.24369	3.52177	4.48637	4.72361	3.0876	2.56277	2.46632	1.30083	1.98042	1.47805	1.81979	1.28831	1.66034	4.87318							Metabolism				Primary metabolism
slc25a4	1.54424	1.91009	1.89002	1.6594	3.26337	2.27631	2.20107	2.84168	4.12407	2.62838	4.54765	4.03156	4.87822	9.68501	9.57952	10.6483	17.619	25.5686	67.4758	75.6497	107.508	110.93	131.097							Metabolism			Phosphate metabolism	Primary metabolism
tbk1	1.36961	1.21462	1.9944	1.51182	2.87976	3.30482	3.32133	3.2565	1.22218	0.342322	0.249215	0.253074	0.445963	0.813098	0.626097	1.27989	1.03635	1.27383	1.49902	1.31394	1.75485	1.48484	1.9083					Immune response	Intracellular signaling cascade	Metabolism				Primary metabolism
pitpnb.2	1.2698	1.84102	1.2983	1.65586	2.54737	3.51334	3.95492	4.36028	2.35498	1.44312	1.0876	0.875491	1.00533	2.54543	1.41329	2.07695	1.64459	2.07705	2.99584	2.69449	2.24827	2.51736	4.28165							Metabolism				Primary metabolism
c9orf95	0.902277	1.99536	1.38185	2.22304	3.03192	2.49493	2.69716	2.43404	2.24387	1.69302	0.175791	0.17915	0.188625	0.280214	0.0913725	0.0586218	0.173149	0.257876	0.31064	0.544998	0.428705	0.248628	1.55674							Metabolism
rhpn2	1.03466	1.45212	1.7638	1.85553	2.81217	3.10182	4.62918	6.57037	7.15797	7.84584	8.13969	8.71952	8.22864	10.5957	6.34628	6.43584	6.51268	4.46159	5.58674	3.74697	4.84631	4.788	7.06529
armc4	0.507176	2.17294	2.4209	1.59173	1.7839	3.04096	2.94418	1.88442	5.06342	9.17093	42.8969	40.515	39.4836	35.9547	32.5294	25.3055	20.8169	12.9285	12.2145	11.0882	9.17981	8.38741	9.33266
coro6	1.24732	1.30613	1.971	1.8299	2.50225	2.50996	2.79104	1.29097	0.905383	0.340216	0.712335	0.588474	1.17884	8.72851	9.95069	13.2473	13.4922	8.20526	9.92802	11.4085	10.7835	10.3115	12.0307			Cell cycle					Mitosis
ift74	0.388668	1.37719	1.19196	1.04526	1.61607	5.73494	4.93317	3.95158	3.5193	3.30434	10.0606	7.3386	8.29007	8.78062	8.02886	5.9094	6.78156	5.10558	6.22738	6.04862	5.04353	4.92848	2.79386
pgm1	0.66479	0.735723	0.849088	1.48955	2.2331	5.21008	6.70906	5.91464	3.66755	5.32047	1.82057	2.18402	2.14	6.20958	8.17872	15.9234	18.4666	21.5868	20.6551	18.733	16.5931	14.9474	13.9065	pgm1						Metabolism				Primary metabolism
eif2b1	1.4583	0.643682	0.371576	0.979077	3.50316	4.02928	2.93164	2.4142	3.47418	1.09539	1.12594	1.72604	5.53462	7.20338	8.77865	8.96311	11.4273	12.708	14.0937	9.69657	9.23045	8.77436	9.75105		Amino acid and derivative metabolism					Metabolism				Primary metabolism
tmem208	0	0.766416	1.32746	2.33293	2.92401	3.60046	3.47494	2.86496	5.11124	11.3195	28.0513	9.74025	20.1707	24.0754	18.9199	30.1861	27.1848	16.2519	20.5976	8.75882	17.8458	10.8924	11.623	zgc:77041
crym	0.879986	1.81452	1.7954	1.83886	1.97215	2.43237	1.39537	1.95109	2.64346	1.61511	2.50314	1.27725	0.406856	0.847776	0.473122	1.36934	2.13479	5.23887	9.36285	12.2888	15.1202	21.4753	17.4613		Amino acid and derivative metabolism					Metabolism				Primary metabolism
lrrc57	0.977091	1.25062	0.666073	0.681353	2.49982	4.60608	2.46359	1.23639	0.867241	0.705735	2.38782	2.38425	2.6853	2.48501	2.30498	2.8032	2.34143	2.9102	2.78085	2.44665	2.36391	3.934	3.93315						Intracellular signaling cascade	Metabolism				Primary metabolism
slc38a9	0.623376	1.10399	1.43334	1.53653	1.94429	3.73619	4.94714	4.74549	3.30477	1.55898	0.732151	1.05553	1.39698	2.07123	1.83936	1.86702	1.31859	0.952979	1.02271	1.63104	1.18826	1.09204	1.74764
adad2	0.606874	1.25304	1.65282	2.17517	1.35933	2.42423	3.87735	2.91474	2.31334	2.12535	0.473691	0.482514	0.677757	0.167699	0.164144	0.0526094	0.155386	0	0	0	0.0769686	0.0744175	0.174507			Cell cycle		Immune response		Metabolism				Primary metabolism
ccdc103	0.459626	1.21556	1.40366	1.23363	1.32571	3.80783	4.53147	4.65489	13.6818	16.8109	35.6165	37.1909	34.9087	37.1214	28.2274	19.9258	16.4692	10.928	13.1513	18.9023	9.86072	10.8389	9.12169
fam124b	0.603158	0.889564	1.84807	1.98171	2.31599	1.66805	1.927	0.620812	1.1792	1.60939	3.13887	1.67856	1.17892	0.666722	0.815761	1.20265	0.540542	0.306777	0.415783	0.3238	0.306005	0.443801	0.346877
chek2	0.632191	1.30515	1.29119	2.07698	1.82071	2.13674	4.64182	3.57664	4.07494	1.68695	1.64391	1.17237	1.58762	3.49262	2.47796	4.21884	4.12663	3.13379	2.90402	2.03642	2.32438	2.16962	3.81756			Cell cycle			Intracellular signaling cascade	Metabolism				Primary metabolism
klhl32	0.624549	1.10691	1.06443	2.0532	2.197	1.92016	2.16182	0.538986	0.338905	0.520487	0.408947	0.249434	0.351198	0.693252	0.297588	0.407278	0.721682	0.558157	0.864905	0.753996	1.15335	0.885451	0.897866							Metabolism				Primary metabolism
cops4	0.445779	0.59152	0.22758	0.399393	2.56787	3.90343	11.3025	9.85121	9.06678	6.46847	12.3351	5.66541	10.0667	13.0151	13.7261	15.6411	18.1371	11.213	13.2772	5.20566	10.6762	8.27224	3.84561							Metabolism				Primary metabolism
ikbkap	0.833777	0.739245	1.06624	1.62004	1.79943	2.05114	2.92781	2.52397	1.40311	0.972606	2.40783	0.833851	1.33171	1.96962	2.13331	3.01176	2.75935	3.35802	3.03581	3.24286	2.92448	2.83208	1.97772					Immune response	Intracellular signaling cascade
ehd3	0.352702	0.936667	1.08102	1.26436	2.03115	2.43885	2.87913	2.36335	1.81433	1.94076	9.92815	8.63365	12.5787	25.0271	24.9422	28.0446	28.1295	37.4416	29.4525	25.2742	33.9222	45.6064	43.8124							Metabolism				Primary metabolism
dusp7	0.548955	1.26471	1.2349	1.18121	1.36936	2.43028	1.74911	0.227317	0.487181	0.768604	1.29352	0.789062	1.2034	1.7362	1.03093	1.17398	1.43758	1.26124	1.44404	1.94408	1.50977	3.08508	3.03051						Intracellular signaling cascade	Metabolism				Primary metabolism
tbce	0.369055	0.653318	1.13102	1.32292	1.59407	2.89206	2.74499	1.42595	0.975586	0.369243	0.144205	0.220255	0.361097	0.918536	0.599638	0.528172	0.992708	1.05659	1.27299	1.4858	1.26473	1.15512	1.11427
akap11	0.707719	0.902337	1.04113	1.26953	2.07861	1.79569	1.61008	0.666737	0.342362	0.0663301	0.174486	0.354314	0.237309	0.424567	0.235806	0.612626	0.529086	0.373652	0.675672	0.711776	0.711614	0.886296	0.839336						Intracellular signaling cascade
lyplal1	0.486889	0.429049	0.990936	0.871061	1.40457	3.13684	1.36857	0.984533	2.50214	0.487965	0.372882	0.955027	0.799476	1.19628	1.1629	1.88307	2.03995	2.93668	3.64418	3.92675	3.1118	4.58602	4.2013							Metabolism				Primary metabolism
hhex	0.435975	1.02964	1.63383	0.911849	1.81294	1.47409	16.9295	64.9209	38.3887	14.5367	12.4118	9.09462	9.00346	11.1711	9.46998	8.85922	10.0075	10.8908	9.2903	10.7631	8.037	9.49201	8.90045							Metabolism				Primary metabolism
tekt3	0.744475	1.31667	1.51979	0.889208	1.90628	0.91481	2.60647	2.92865	3.0429	1.98698	65.2681	77.5714	92.5415	171.235	175.648	167.823	130.017	75.2044	64.7796	77.3546	63.9871	57.4612	44.7436
agtrap	0.569177	0.67167	1.7442	1.02011	1.2748	1.92399	0.728035	0.781673	0.278492	0.284741	0	0.0754682	0.0530188	0.0786833	0.231117	0	0.291576	0	0.261708	0.305539	0.433356	0.488898	0.327331
wdr69	0.431854	0.764135	1.98442	1.54773	1.03648	1.39324	0.620127	2.22039	11.2554	19.9869	37.7184	31.912	31.6802	26.5663	23.2813	22.8459	18.9005	15.8873	11.6022	11.8246	10.51	8.73124	8.56855							Metabolism				Primary metabolism
cst7	0.314394	0.833239	1.60318	1.97066	1.20802	1.15855	2.2396	2.08844	1.27702	0.314783	0	0.372989	0	0.129692	0.126596	0.0814859	0.120352	0.119366	0.107802	0.506646	0.119056	0.229913	1.08497							Metabolism				Primary metabolism
lyrm4	0	1.20367	1.39054	1.22393	1.31886	1.88914	2.21177	1.7103	0.192035	1.03084	0	0.798779	0.739596	1.66889	1.34566	1.40445	0.259393	2.30503	0.692863	1.65899	0.255391	0.736602	0
LOC100158581	0.435553	1.41589	1.03967	0.976465	1.39261	1.47326	1.19512	0.828598	0.603436	0.399209	0.228645	0.348422	0.265931	0.272319	0.267402	0.360119	0.363826	0.473288	0.780233	0.7594	1.44418	3.63072	3.9447
entpd1	0.54169	0.720191	1.20039	1.53809	1.29912	1.41571	1.61519	1.63761	3.15738	2.93409	8.09458	8.62322	11.561	14.3641	12.5115	11.9212	12.9761	10.5181	9.41424	8.13761	7.48965	9.8576	7.70949							Metabolism				Primary metabolism
rad9a	0.224605	0.596057	0.458653	1.60985	1.07819	2.48427	1.50407	1.2696	0.985799	0.449539	0.525151	0.624372	0.939158	0.279027	0.363951	0.933966	0.431033	0.427973	1.39196	0.723554	0.256134	0.660208	0.581281	rad9a		Cell cycle				Metabolism				Primary metabolism
mcart1	0.36597	1.13377	0.186931	1.14789	1.05382	2.53051	2.19547	0.659945	0.806311	0.274615	0.71507	1.09215	0.562756	0.835008	1.63539	1.99989	1.96891	2.44492	2.58801	1.76804	2.71752	2.4259	1.8942							Metabolism			Phosphate metabolism	Primary metabolism
fam78a	0.472968	0.628565	0.846242	1.48408	1.47484	1.41766	1.71132	1.22342	0.524257	0.473033	3.8984	5.47431	7.63865	15.7895	15.6316	19.4536	16.9808	15.2984	17.1414	20.0816	20.0466	16.2992	15.1971
tdrd12	0	0.620552	1.79107	1.25838	1.35054	1.29468	1.33115	0.895735	1.62561	1.75957	0.271557	0.138727	0.291253	0.723655	0.14115	0	0	0.133213	0.12029	0	0	0	0							Metabolism				Primary metabolism
rgn	0.304552	1.07636	1.55319	1.63636	0.877603	0.841759	1.73695	0.934299	0.530652	0.914735	0.708263	0.240986	0.422089	1.75958	1.84071	1.73709	2.44898	15.3849	31.0288	45.6407	46.9586	52.9232	33.1063						Intracellular signaling cascade	Metabolism				Primary metabolism
psat1	0.545535	1.44865	0.557307	0.325927	1.39633	2.0118	1.83287	0.187394	0.4274	0.818706	0.852803	2.53261	2.5931	3.62115	3.17677	3.12322	1.95671	2.08269	2.76021	3.36761	2.70072	2.67881	3.45106		Amino acid and derivative metabolism					Metabolism				Primary metabolism
wars	0.515175	1.02683	0.921634	1.38549	1.11223	1.30653	0.807062	1.46487	1.67336	2.38315	2.82883	2.77442	4.69924	7.17619	6.03904	5.53907	5.75037	5.27282	3.5186	4.1469	3.34268	3.04446	1.99974							Metabolism				Primary metabolism
znf519	0.515111	0.685115	1.44929	1.09714	1.29694	1.18803	2.21515	4.34523	7.61414	5.24682	5.83396	5.04975	3.23163	2.92642	2.61048	2.33742	2.80579	2.05034	1.87598	2.22791	1.62643	1.59901	1.77722							Metabolism				Primary metabolism
rg9mtd1	0.306059	0.813075	0.625556	0.960146	1.17486	2.25771	1.69325	0.631948	0.31558	0.45924	0.479377	1.0366	1.37203	1.84338	1.49502	1.55445	2.1189	1.81326	1.95587	0.985576	1.05025	0.95959	1.58406
vps37a	0.197872	0.175107	0.202101	0.354618	1.3296	3.83061	3.50944	1.52778	0.522405	0.296981	1.23595	1.25886	1.43685	2.54303	2.40909	3.03656	3.64828	2.64219	3.47875	3.18672	2.93675	2.3299	2.38972	vps37a
arl10	0.589289	0.781125	0.601141	0.791612	1.41501	1.90032	1.26133	1.65819	5.73821	12.8315	17.5991	24.725	21.1677	21.5316	18.8893	17.3457	12.1886	9.96438	8.4942	8.78325	8.93366	9.92225	9.91375
