# Supplementary material for: RNA sequencing reveals a diverse and dynamic repertoire of the Xenopus tropicalis transcriptome over development
Source: HighWire-hosted journal article supplement (doi:10.1101/gr.141424.112), 2012-09-07
Supplement: GENOME_2012_141424.zip [file File S7 - Human mouse zebrafish matches.xlsx]

## Sheet: 2cell
Unaligned Trinity contigs with no signifcant match to Bacteria, Fungi or vectors	Contig sequence	If significant match to human genome, annotated location	If significant match to mouse genome, annotated location	If significant match to zebrafish genome, annotated location
comp24884_c0_seq1	CAGGCTCCCCGCATGATTGGCTTCAAAGTGGCTTGTGCCAAACGACTAGAGAGGTGCAAAAAGTACAAGCAGAGCATTTGCAGCCCAGCTAAGGGAGAGCGGCAGCTTTCAGCGAGAGCTGCTCCGGCTGCTTGTGCCTCCCCACACTTCTCACTATAGGCAGATTCCCCAAGCATGCAAAAGAAGATAAAAGGCACTTAACCCAT	Intergenic	NM_052977/double-stranded RNA-specific editase B2	-
comp10773_c0_seq1	CTCACACAAACTCAGGCAGAAGCAGCGACAGCAGCAGGCGAGGCGGCCGGGCGTCACGTGACCAGGCGCTCCAAACTCCCCGACATTCCAGCACAGTTTTGTCCAACTTCATGAGCTCCCGGATTCGTTAAACTTTATGGGAACAGCTTCCCCCCATGCCCACTCGGTCTCCCTCATGCAACCGCAAGGAACGCGTCAGCCTAGGAGAGCGCTAAACCCCACCACTTTCTCCAGCAACAATGGCCATGGGAGTGGTTGGGGGTTTTTTGGGGGGGAAACTTACGCGTTAGGACTACTGTTAAGCACAAAAACTAGCGCAAAGTTTCCAAGTGTATCGATTATATAAACACAAAGGCTTGCAGCAATAGCTCAGATATCGTACATCCCTCCCCCCCTTTC…	NM_015461/zinc finger protein 521	NM_145492/zinc finger protein 521	-

## Sheet: 4cell
Unaligned Trinity contigs with no signifcant match to Bacteria, Fungi or vectors	Contig sequence	If significant match to human genome, annotated location	If significant match to mouse genome, annotated location	If significant match to zebrafish genome, annotated location
comp11841_c0_seq1	GCTGCCCATGTCCCTCCCTGCTCCTCACACAAACTCAGGCAGAAGCAGCGACAGCAGCAGGCGAGGCGGCCGGGCGTCACGTGACCAGGCGCTCCAAACTCCCCGACATTCCAGCACAGTTTTGTCCAACTTCATGAGCTCCCGGATTCGTTAAACTTTATGGGAACAGCTTCCCCCCATGCCCACTCGGTCTCCCTCATGCAACCGCAAGGAACGCGTCAGCCTAGGAGAGCGCTAAACCCCACCACTTTCTCCAGCAACAATGGCCATGGGAGTGGTTGGGGGTTTTTTGGGGGGGAAACTTACGCGTTAGGACTACTGTTAAGCACAAAAACTAGCGCAAAGTTTCCAAGTGTATCGATTATATAAACACAAAGGCTTGCAGCAATAGCTCAGATA…	NM_015461/zinc finger protein 521	NM_145492/zinc finger protein 521	-
comp25295_c0_seq1	AAGAAGCTGCCATCTCTGCCCGCCTTGGCCAATAGCTCTTCCGCTGCTGCCCGGCTCAGGTCCCGGTGGTACCACGGTAACGCCATGTTAGCGGCCAGAGTCAGTGCCCCCCCACAGCCCGACGACATGGCAGCTTCTGGGGTCCAATCCAAATGCCCAAACGTAATTACCCCCGGCAAGGGGCAAAGTGCTGATTGTGTGAGGCGCAGGGGCCACAGGAATAGTGGGAACAGACTGGCCCCCAATCCAGCAACAGGCCCCCCGGGCACTCACACTCAGGGC	NM_001567/phosphatidylinositol 3,4,5-trisphosphate 5-phosphatase 2	-	-
comp17303_c0_seq1	TGCAGGGGAGTCCCTGTGCTGCCGCAGTTCCTTGGCATCCATGGCTCACATTCCCCTATCCTGGGCTAGCAGCACCTGTTCTAGATAAATGTCAACCTGAAAAACTGGAGGGAAGTTACATTACAGCCATAGGCCTGTGTATGTATGTATGTGTATATGTATGTGTGTGTGTTTGTACATGCGTGTTACTGTCTGTGTTGCAGTCTGTGAGTCTTTGCTTCTGTCTGTGTCGCAGGCTGATTTGTTGTTCTGCACGGAGCTGTAAGTTATTATTATATTATATAGGGGCCACATGTCCTGCTGCAATTTAGATATTTTGTACCAATCGGAAGCACCAGTATTTTATTTACAATCATTTCATATTATTATGTTTATTATGTGTTCCTATGTATAATAAAT…	-	Intergenic	Intergenic

## Sheet: 8cell
Unaligned Trinity contigs with no signifcant match to Bacteria, Fungi or vectors	Contig sequence	If significant match to human genome, annotated location	If significant match to mouse genome, annotated location	If significant match to zebrafish genome, annotated location
comp13831_c0_seq1	TGGCTGCCCATGTCCCTCCCTGCTCCTCACACAAACTCAGGCAGAAGCAGCGACAGCAGCAGGCGAGGCGGCCGGGCGTCACGTGACCAGGCGCTCCAAACTCCCCGACATTCCAGCACAGTTTTGTCCAACTTCATGAGCTCCCGGATTCGTTAAACTTTATGGGAACAGCTTCCCCCCATGCCCACTCGGTCTCCCTCATGCAACCGCAAGGAACGCGTCAGCCTAGGAGAGCGCTAAACCCCACCACTTTCTCCAGCAACAATGGCCATGGGAGTGGTTGGGGGTTTTTTGGGGGGGAAACTTACGCGTTAGGACTACTGTTAAGCACAAAAACTAGCGCAAAGTTTCCAAGTGTATCGATTATATAAACACAAAGGCTTGCAGCAATAGCTCAGA…	NM_015461/zinc finger protein 521	NM_145492/zinc finger protein 521	-

## Sheet: 16cell
Unaligned Trinity contigs with no signifcant match to Bacteria, Fungi or vectors	Contig sequence	If significant match to human genome, annotated location	If significant match to mouse genome, annotated location	If significant match to zebrafish genome, annotated location
comp31289_c0_seq1	GTCCCAGTCCTCCAGCAGGGGGCTGTCCTCCGAGGGTTTGATATCGATCTTGAGCTGCAGGAAGGGCTGAGAGGCCGCGGCGAAGGCATTGGCCAAATCCCACTCCGACACCAACGCCAGGTAAGTCTCGTGGCCCTGTTTGTCCCGGCCCAGGTAACTGATTCCAAAGCTCTTCCCGCTGAGGTCGAAGGCTCGGATGAGGATGTGCTGCAGGACATCGAGGGAAGTGATTTGGGGGTCGACGGCGAAGGAGCGAGACTCGGGGGGCTGAACCCCCTCACACTTCCGGACACGGACTCGAACCACCTCCCGTTCCTCCTCCTCCATGTCCG	NM_002536/TBC1 domain family member 25	NM_172478/TBC1 domain family member 25 isoform 1	-

## Sheet: Stage6
Unaligned Trinity contigs with no signifcant match to Bacteria, Fungi or vectors	Contig sequence	If significant match to human genome, annotated location	If significant match to mouse genome, annotated location	If significant match to zebrafish genome, annotated location
comp23497_c0_seq1	CGCTCTCGCTGTCCCGCACCAAGAAGCTGCCATCTCTGCCCGCCTTGGCCAATAGCTCTTCCGCTGCTGCCCGGCTCAGGTCCCGGTGGTACCACGGTAACGCCATGTTAGCGGCCAGAGTCAGTGCCCCCCCACAGCCCGACGACATGGCAGCTTCTGGGGTCCAATCCAAATGCCCAAACGTAATTACCCCCGGCAAGGGGCAAAGTGCTGATTGTGTGAGGCGCAGGGGCCACAGGAATAGTGGGAACAGACTGGCCCCCAATCCAGCAACAGGCCCCCCGGGCACTCACACTCAGGGGCCCCCCGGGGCACTCACACTCAGGGGCCCCTCGGGGCACTCACACTCAGGGCTCCCCCCGGGCACTCACACTCAGGCCTC	NM_001567/phosphatidylinositol 3,4,5-trisphosphate 5-phosphatase 2	NM_001122739/phosphatidylinositol 3,4,5-trisphosphate 5-phosphatase 2	NM_001039804/phosphatidylinositol 3,4,5-trisphosphate 5-phosphatase 2A
comp23497_c0_seq2	CGCTCTCGCTGTCCCGCACCAAGAAGCTGCCATCTCTGCCCGCCTTGGCCAATAGCTCTTCCGCTGCTGCCCGGCTCAGGTCCCGGTGGTACCACGGTAACGCCATGTTAGCGGCCAGAGTCAGTGCCCCCCCACAGCCCGACGACATGGCAGCTTCTGGGGTCCAATCCAAATGCCCAAACGTAATTACCCCCGGCAAGGGGCAAAGTGCTGATTGTGTGAGGCGCAGGGGCCACAGGAATAGTGGGAACAGACTGGCCCCCAATCCAGCAACAGGCCCCCCGGGCACTCACACTCAGGGGCCCCTCGGGGCACTCACACTCAGGGCTCCCCCCGGGCACTCACACTCAGGCCTC	NM_001567/phosphatidylinositol 3,4,5-trisphosphate 5-phosphatase 2	NM_001122739/phosphatidylinositol 3,4,5-trisphosphate 5-phosphatase 2	NM_001039804/phosphatidylinositol 3,4,5-trisphosphate 5-phosphatase 2A

## Sheet: Stage8
Unaligned Trinity contigs with no signifcant match to Bacteria, Fungi or vectors	Contig sequence	If significant match to human genome, annotated location	If significant match to mouse genome, annotated location	If significant match to zebrafish genome, annotated location
comp27926_c0_seq1	GGAAGACTTCGATAGCAAGGAGTGGGTGATCATAGATAAAGAAACGGAGCTGAAGGACTTCCATCCCGGGGCAGAACCCAGCACCTCCGGAACTACTGACGAAGAGCCCGAGGTGCTGAGACCCCTGGAGGAAGGGGAGGATCGGCGGAGGCCCGGGGGGGCGGAGGCAGCTGTAAGACCAAAGGTGCACGAGGCCAGGCCACGGGCCATGCAAACCGTAGCCGAGGAGGAGACGTCCTGTCGAAATGAGGGGCTGGACAGCAGGCCCGACGCGACTCCTGGGAGCCCATCCCATTCCCATTCTACATCCCTAACG	-	NM_001162864/tau-tubulin kinase 1	Intergenic
comp19240_c0_seq1	CTCTCGCTGTCCCGCACCAAGAAGCTGCCATCTCTGCCCGCCTTGGCCAATAGCTCTTCCGCTGCTGCCCGGCTCAGGTCCCGGTGGTACCACGATAACGCCATGTTAGCGGCCAGAGTCAGTGCCCCCCCACAGCCCGACGACATGGCAGCTTCTGGGGTCCAATCCAAATGCCCAAACGTAATTACCCCCGGCAAGGGGCAAAGTGCTGACTGTGTGAGGCGCAGGGGCCACAGGAATAGTGGGAACAGACTGGCCCCCAATCCAGCAACAGGCCCCCCGGGCACTCACACTCAGGGGCCCCT	NM_001567/phosphatidylinositol 3,4,5-trisphosphate 5-phosphatase 2	NM_001122739/phosphatidylinositol 3,4,5-trisphosphate 5-phosphatase 2	-
comp14630_c0_seq1	CTCACACAAACTCAGGCAGAAGCAGCGACAGCAGCAGGCGAGGCGGCCGGGCGTCACGTGACCAGGCGCTCCAAACTCCCCGACATTCCAGCACAGTTTTGTCCAACTTCATGAGCTCCCGGATTCGTTAAACTTTATGGGAACAGCTTCCCCCCATGCCCACTCGGTCTCCCTCATGCAACCGCAAGGAACGCGTCAGCCTAGGAGAGCGCTAAACCCCACCACTTTCTCCAGCAACAATGGCCATGGGAGTGGTTGGGGGTTTTTTGGGGGGGAAACTTACGCGTTAGGACTACTGTTAAGCACAAAAACTAGCGCAAAGTTTCCAAGTGTATCGATTATATAAACACAAAGGCTTGCAGCAATAGCTCAGATATCGTACATCCCTCCCCCCCTTTC…	NM_015461/zinc finger protein 521	NM_145492/zinc finger protein 521	-
comp4751_c0_seq3	GCAGTCCAAGACCTTGCAGAGGGCAGGCAGGGAGGCTGGAGGAAAAGCAGAGAGAGCTCTTGCTGAGGGACCCTCCGTTTGTCTTGCCTTAGTTGGGAACGGGCTGACATTGAACAACTTCAGCTGTTTGCTTTTAGGATGTCTCGTCGCAAGCAAGCGAAGCCAAGATCGCTGAAAGGTAAGAGACCGAGCGACGCTCCTTATGTTAGAGCTGGGGCCAGCCTATAGCCGGGATACTGGCACATCCCGCTACCCTCCCTCCACACAGAGGAGATGCAGCGGATCGG	NM_015461/zinc finger protein 521	NM_145492/zinc finger protein 521	-

## Sheet: Stage9
Unaligned Trinity contigs with no signifcant match to Bacteria, Fungi or vectors	Contig sequence	If significant match to human genome, annotated location	If significant match to mouse genome, annotated location	If significant match to zebrafish genome, annotated location
comp40336_c0_seq1	TTGCATATAAAGGATCCTGTTACATTAACGGTGCCCAAGAAGCAATTGCCTGCTCAGGTCCCGCCCCTTCCCGTGCGAACTGTTCACTTCCATGGCAAGGTGATACGAATCAACCCCGAGCCGCCGGCAGCTGCTAGGGGGAAGCCTTTCGTGTGGGGAGGTAGCGGCTGGGAAAAACTCGTTACATCAAAGAGAAACCTGTT	Intergenic	Intergenic	-
comp39458_c0_seq1	GCACTAGCACATTGGGGGCCACAGGGGGCGTTACCTCCACCAGCATCTTGAGGCGCATGATCCGCTGGAAGGGGAGGATGAGGAAGGAGGTGAGTGGGAGGCGCTGGCAGACCTGGTCCTCCTCCAGCTTGGAGAGAATTCCCCGGAAGCGCGGGTTCTCCTGTCTGAGAGAAACGGGGGGTCAGAAATCTGCTGTTCCATTGGGCTGGCAGGGCATGCTGGGATTTGTAGTCTGTAGCAGCAACAGTCTGCCTTCTGTGCATAGGGCTCTTATGGGGAGTGGGCGGGTACTTACGGGAGTGGGAGGGTACACATGGGAGTGGGCGGGTACTTATGGGGAG	NM_153213/rho guanine nucleotide exchange factor 19	NM_172520/rho guanine nucleotide exchange factor 19	-
comp15681_c0_seq1	CACAAACTCAGGCAGAAGCAGCGACAGCAGCAGGCGAGGCGGCCGGGCGTCACGTGACCAGGCGCTCCAAACTCCCCGACATTCCAGCACAGTTTTGTCCAACTTCATGAGCTCCCGGATTCGTTAAACTTTATGGGAACAGCTTCCCCCCATGCCCACTCGGTCTCCCTCATGCAACCGCAAGGAACGCGTCAGCCTAGGAGAGCGCTAAACCCCACCACTTTCTCCAGCAACAATGGCCATGGGAGTGGTTGGGGGTTTTTTGGGGGGGAAACTTACGCGTTAGGACTACTGTTAAGCACAAAAACTAGCGCAAAGTTTCCAAGTGTATCGATTATATAAACACAAAGGCTTGCAGCAATAGCTCAGATATCGTACATCCCTCCCCCCCTTTCTGGG…	NM_015461/zinc finger protein 521	NM_145492/zinc finger protein 521	-
comp18538_c0_seq3	TTCATCTTCTATTATTTGTAGTTTTTTATTATTTCTTCATCCTCTTCATCATCCTCCTCATCATCATCTTCATCTACTTCTCCATCATGTCCAAAGTCTTCTTCCTCTTCCTCACCACTGGCATCCTCTTCATCTTCTTCCTCCCCTATCTCCTCTTCATCTTCATCGTCATCTTCCTCCTCATCTACATCTTCTTCCTCTTCACCTTCCTCCTCTTCATCTTCTTCCTCATCTTCACCCTCTTCATCTTCTTCCTCCTCATCTACACCATCTCCCACAACTGACTTATCTGGAT	-	Intergenic	-

## Sheet: Stage10
Unaligned Trinity contigs with no signifcant match to Bacteria, Fungi or vectors	Contig sequence	If significant match to human genome, annotated location	If significant match to mouse genome, annotated location	If significant match to zebrafish genome, annotated location
comp25289_c0_seq2	GCTGGCGGATAGGGAGGGCATACCTGGGAATGGGAGAAGCTGTGTTGACAGCTGGCGGATAGGGCGGGCATACCTGGGAATGGGAGGAGCTGTGCAGAGACAGCTGGCGGATGCAGCCATTCACAGCGATGCTACTTCTCCCAGGAGCCAAATCCTCTTCTGTCATCTCCACCCAGCCGAGACAGCACACAGGGAAAGTCTGGGCCCCACAAC	-	-	Intergenic

## Sheet: Stage11-12
Unaligned Trinity contigs with no signifcant match to Bacteria, Fungi or vectors	Contig sequence	If significant match to human genome, annotated location	If significant match to mouse genome, annotated location	If significant match to zebrafish genome, annotated location
comp65755_c0_seq1	GGGGGACACTGGGCCATTATAGCAGTTTACAAACCTTGGATAAAGTGAGTTGGCGGTTGGATAATTGGTTATTGAATCCCGGGCCCCCGACTGGCAGCTCCGAGCCAGGAACTGGGGGGCCTGTTGCCAATTTGAGTGAATGCAGTGAGTGTAGTCGGGGAGACAGGCCCTTCCTGTGGCTGCTGCACACTGGCCCTTTGTTATACAGCAGCCCCGCTACATAAATACGGCAGCAGCGCAGCAGCGCATCCAGCGCCCGGGGGATTGTGGGAAACAGAGGCTGCAGTCGTG	Intergenic	Intergenic	-
comp38982_c0_seq1	TGTGTGTGTGTGTGTGTGTGTAAGGATCTGCGTGTATCTGTGTATCTGTGTGTGTGGGGGGGGGGGAACATACTGTATGTCTGGCTGTCTGAGTTATCTGCACTGTTGTTATTTTTGTTTGTGACCATGTATGTTGTATGTGCAGGTGTTTGTGTATTTATGTGTGTGTGTGTCTGTGTGGGGTGGTATCTGGGTGTGTGTCTGTAAATGTGTGTCC	-	-	Intergenic
comp45811_c0_seq1	GGTCACTATGGGGTTTATCACACGAGTCCGACCTTCAGCTGCGGCACCAAACCCGTGGTTCTGTGGAGCCAACAGGACGTCTGCAAGTGGCTAAAGAAGCATTGTCCCTACAACTATCTCACCTACGTGGAGGCCTTTGCCCACCATGCCATCACAGGTACCCGCCCCCCAGGCATTCCCTCCCACCATGCCATCACAGGTACCC	NM_080621/sterile alpha motif domain-containing protein 10	NM_172676/sterile alpha motif domain-containing protein 10	Intergenic
comp54503_c0_seq1	CGTTTCCTGAAGGAATGTTGTGTGAAGAAGGAATCATTGGGGGACACTGAGGGTCCCAGGAACAATGCCGGGCCCAGCGCAGCGCCCCCCGAGAAGAAGCAAAATGAACTGGTGATTGAGAAAGAGTTGAACATTAGTCCGGCCTCCTGCAAAGGCCCCGGGAACGAGCCCCTTCCCAAGCAGAACAACTCTGAGGCCAATGTCCAAAACGGGTCCCTCAAAAGCGGGACCCCCAGATCTACTCCGGATCACATGGTCTGGACTCCCCAAAGGGGAACCTTGCAGAGATCCTCTGGGAGCAGCTGGTCCTGGAAGCCTCTTGCCTCCAGGGAGGTGACGGAGGTCACAGAAGTCACAGAGACAATTGTCACAGAGATTGTGGAGGTGACCCAGTACACG…	-	-	Intergenic
comp36997_c0_seq1	TATGTCCCAGTCCTCCAGCAGGGGGCTGTCCTCCGAGGGTTTGATATCGATCTTGAGCTGCAGGAAGGGCTGAGAGGCCGCGGCGAAGGCATTGGCCAAATCCCACTCCGACACCAACGCCAGGTAAGTCTCGTGGCCCTGTTTGTCCCGGCCCAGGTAACTGATTCCAAAGCTCTTCCCGCTGAGGTCGAAGGCTCGGATGAGGATGTGCTGCAGGACATCGAGGGAAGTGATTTGGGGGTCGACGGCGAAGGAGCGAGACTCGGG	NM_002536/TBC1 domain family member 25	-	-
comp60321_c0_seq1	AAGCAATTGCCTGCTCAGGTCCCGCCCCTTCCCGTGCGAACTGTTCACTTCCATGGCAAGGTGATACGAATCAACCCCGAGCCGCCGGCAGCTGCTAGGGGGAAGCCTTTCGTGTGGGGAGGTAGCGGCTGGGAAAAACTCGTTACATCAAAGAGAAACCTGTTGTGAGGCAGGGGGCACCGTCCCGGGCAATGAATGCGGAAGTAGGCGGCTACATGGGATGGAAGGGTTGTGTCACAGACAAATTCACCCCCACAACATTCACTGCGCCTCCAATGCCGGCCAAGAAAGTCTCTTTGGCAAAGCCTAGTTCGTGCCTTGATCTTTTAG	Intergenic	Intergenic	-

## Sheet: Stage13-14
Unaligned Trinity contigs with no signifcant match to Bacteria, Fungi or vectors	Contig sequence	If significant match to human genome, annotated location	If significant match to mouse genome, annotated location	If significant match to zebrafish genome, annotated location
comp50721_c0_seq1	AGACATTCAGATCCCAGGGCTTCTCAGACAGTCTCAACTGATAGACAGACACATCGAGCTGCTTTTCCTGCTTCACTTCGTTACTCCTCCTCCTGCTGCCAACGTCACCCTGACACTTTCATAGAGATCTCACACAAACCACACCTGTCAATCTATTTAATGGCTTTGTTTTCATTTTATACCCTGGCTGCTTCTTTCTCTCCCTCCCT	NM_005786/teashirt homolog 1	NM_001081300/teashirt homolog 1	Intergenic
comp10768_c0_seq1	GTGCCGGTGGGGGCTGTGTGGGGGCAGCGCCCTGTTGTTACTGCAGAGCTGTGAGTGCGACTCCCACAGGGAGGGGAGACATGTGACCCACTCACTCACAGACTCACACTCACTCACATAGAGTCACACACACTCATAGACTCACACTCACTCATAGACTCACACTCACTCACAGGGTCACACTCACTCACAGGGTCACAC	-	-	Intergenic
comp51298_c0_seq1	TGCGGCAGATGTTTTGGATCTCCGGCTCCCAGTTAAATTAGTTGTTCTTGGATCCTATCAGGAATCCAGCAACAAGGTTACAGCAGATGGTGTTATTGGCCTGACGCGAGCCTTTCTGGCTGCAGGAGCTCAGTGTGTCCTTGTATCTCTCTGGCCTGTTCCTGTGGCGGCTTCAAAAATGTTTGTTCATGCATTTTACTCATCTCTCCTAAATGGAATGAAAGC	NR_026963/Unknown	-	Intergenic
comp41947_c0_seq1	GTTTTCTGCAAATGCTAATGGAACGGAAAACATGTTTATTAAAGGCAGGAAGAGGGCTGTTATGCTTCTACTGTCTCAAAATGTCCAGAATGACACACTCATTCTCAGATGTCTTCCGTCTGTGCCTGCGAGGTCCCGGGTTAAAGCAGCACCAGCAGGCAGGTAGGTAGGGGCTAAAGGTTTGATCAGTCTGTGATGGCTCCACTCACTCTGCATTTGTCTCCAAGGTACGTCTGCCCAGGGGGGACAGGCTGGCTCTGGTACTACTCATTTTCCATTATCCATCTGACTTGTCTCTGGCACGCTGAAGTCACTTTGATTTGCTTGATACACTGCTTGACAAAGCTGGGTGATGGCTGAAAAGTAGATCCAGCTGCTCTGAAAAGCGCACACCTGACA…	Intergenic	-	Intergenic
comp45862_c0_seq1	GATGGATTAGAGAGCTAAACAGCTCCATTGCGAGGCACCACCTGATGTCAGACTGCGTCCCATATAAAGAGAGAGGCTGAGAGTGCTGAGCTCAGCTATTGCTGGCAGAGACCCCCTCCTCCCTCCCTCCGTCCCTCTCTCTCTGTCTCTCCCACTGCAGAAAGTCAGAGCTGTCCAGTGCTGAATGTGTTTCCCCATCCCCGGGCTGACAAAGAGGCACCCCAAGAAGCCCCACCAAGGACCCCCACCAAGGACCCCCACCATGCCCCGCTCCTTCCTGGTCAAGAAGATTAAAATGGACGACTTCTCTTCCGCTGGGATTGCTGCTCCCCATTACCCTCACTTTGATGATCCT	-	NM_001160410/transcriptional repressor scratch 2	-
comp20489_c0_seq1	TTTTTCTATAATCCCTTACAATTTTTTCTTTTGAGGCCGAACAGTCTATTGACTGCACACTTGTAAACCCTCTGGTGAAGTCACTGGGCTTTCTCTAAAGGCCCTCAAGGCTGCTGTTTTGTTCTAAATACAATTGTTTTTTGGCTTTCTCCTATGGTATATGTATCGTCTGGAATCTGATTTATAGTTGGTGAGGTAACATACGTGGA	NM_005968/heterogeneous nuclear ribonucleoprotein M isoform a	NM_001109913/heterogeneous nuclear ribonucleoprotein M isoform b	NM_001256631/heterogeneous nuclear ribonucleoprotein M
comp41469_c0_seq1	TCTCTCTGTCTCTGTCTCTCTCTGTCTCTGCCTCTCTCTCTGTCTGTCTCTCTCAGTTCCTTTCCCAGTATCCCCTTTACTTTCCCTTTCTGTTCCGTTGCTCGATGGGACATAATGACGAGTACAAGGGTGGGCATGGAACACTAATTGCTCCCTGTAATTAGGGCTAATTATTCAGCTAATGAGATACAATCAGGCCACTCCCATATGATTGTTACACTGCTAACTCTCCCCCAGCAGTCAGACTGGTACTGCCCCCTGTGCCCTGGCATTGACTGTACAGAATGGGGGCTGAAAGGGTTAAAGATCCACTTTAAATATCAGGTGGTAATAGTGGGTGCCCCCCCCCCCGAGGGATCACCCCTGGATTGCGC	-	Intergenic	-
comp23192_c0_seq1	CACAAACTCAGGCAGAAGCAGCGACAGCAGCAGGCGAGGCGGCCGGGCGTCACGTGACCAGGCGCTCCAAACTCCCCGACATTCCAGCACAGTTTTGTCCAACTTCATGAGCTCCCGGATTCGTTAAACTTTATGGGAACAGCTTCCCCCCATGCCCACTCGGTCTCCCTCATGCAACCGCAAGGAACGCGTCAGCCTAGGAGAGCGCTAAACCCCACCACTTTCTCCAGCAACAATGGCCATGGGAGTGGTTGGGGGTTTTTTGGGGGGGAAACTTACGCGTTAGGACTACTGTTAAGCACAAAAACTAGCGCAAAGTTTCCAAGTGTATCGATTATATAAACACAAAGGCTTGCAGCAATAGCTCAGATATCGTACATCCCTCCCCCCCTTTCTGGG…	NM_015461/zinc finger protein 521	NM_145492/zinc finger protein 521	-

[truncated: 13 more sheets: Stage15, Stage16-18, Stage19, Stage20-21, Stage22-23, Stage24-26, Stage28, Stage31-32, Stage33-34, Stage38-39, Stage40, Stage41-42, Stage44-45]
