# Supplementary material for: RNA sequencing reveals a diverse and dynamic repertoire of the Xenopus tropicalis transcriptome over development
Source: HighWire-hosted journal article supplement (doi:10.1101/gr.141424.112), 2012-09-07
Supplement: GENOME_2012_141424.zip [file Table S1.docx]

**Table S1.** Categories of novel junctions that are supported by at least two non-redundant reads (nNR > 1).

|  | **2-cell** | **4-cell** | **8-cell** | **16-cell** | **St 6** | **St 8** | **St 9** | **St 10** | **St 11-12** | **St 13-14** | **St 15** | **St 16-18** |
| --- | --- | --- | --- | --- | --- | --- | --- | --- | --- | --- | --- | --- |
| **Exon skipping** | 756 | 789 | 744 | 822 | 783 | 815 | 1113 | 1264 | 1713 | 1568 | 816 | 1414 |
| **Intergenic** | 5824 | 6209 | 5966 | 6211 | 6253 | 6543 | 7594 | 7092 | 7817 | 7170 | 5077 | 8506 |
| **Intron retention** | 80 | 95 | 83 | 99 | 98 | 91 | 125 | 118 | 136 | 115 | 53 | 115 |
| **Novel 3' splice site** | 2490 | 2664 | 2550 | 2674 | 2648 | 2764 | 3295 | 3243 | 3874 | 3600 | 2090 | 3627 |
| **Novel 5' splice site** | 1951 | 2129 | 2042 | 2149 | 2162 | 2193 | 2728 | 2594 | 3227 | 2918 | 1512 | 2851 |
| **Novel 3' UTR** | 65 | 69 | 65 | 68 | 64 | 75 | 93 | 84 | 103 | 86 | 52 | 94 |
| **Novel 5' UTR** | 597 | 684 | 623 | 642 | 671 | 696 | 816 | 657 | 727 | 628 | 329 | 624 |
| **Other** | 2599 | 2769 | 2667 | 2748 | 2772 | 2889 | 3505 | 3292 | 3750 | 3464 | 2239 | 3818 |
| **TOTAL** | 14362 | 15408 | 14740 | 15413 | 15451 | 16066 | 19269 | 18344 | 21347 | 19549 | 12168 | 21049 |

|  | **St 19** | **St 20-21** | **St 22-23** | **St 24-26** | **St 28** | **St 31-32** | **St 33-34** | **St 38-39** | **St 40** | **St 41-42** | **St 44-45** |
| --- | --- | --- | --- | --- | --- | --- | --- | --- | --- | --- | --- |
| **Exon skipping** | 1848 | 1778 | 1783 | 2333 | 1697 | 1613 | 1574 | 1151 | 1602 | 1509 | 1167 |
| **Intergenic** | 9328 | 9209 | 8674 | 11120 | 9290 | 9474 | 10108 | 8287 | 10079 | 10577 | 8959 |
| **Intron retention** | 120 | 118 | 120 | 150 | 121 | 116 | 130 | 96 | 114 | 102 | 80 |
| **Novel 3' splice site** | 4103 | 4001 | 3762 | 4975 | 4034 | 4029 | 4254 | 3343 | 4189 | 4129 | 3398 |
| **Novel 5' splice site** | 3270 | 3177 | 3008 | 4046 | 3097 | 3193 | 3348 | 2608 | 3280 | 3313 | 2533 |
| **Novel 3' UTR** | 125 | 125 | 121 | 180 | 122 | 133 | 142 | 104 | 146 | 146 | 110 |
| **Novel 5' UTR** | 678 | 670 | 594 | 786 | 651 | 671 | 724 | 576 | 694 | 718 | 587 |
| **Other** | 4219 | 4130 | 3979 | 5169 | 4238 | 4365 | 4651 | 3669 | 4554 | 4739 | 3889 |
| **TOTAL** | 23691 | 23208 | 22041 | 28759 | 23250 | 23594 | 24931 | 19834 | 24658 | 25233 | 20723 |
