# Supplementary material for: RNA sequencing reveals a diverse and dynamic repertoire of the Xenopus tropicalis transcriptome over development
Source: HighWire-hosted journal article supplement (doi:10.1101/gr.141424.112), 2012-09-07
Supplement: GENOME_2012_141424.zip [file Table S3 v2.docx]

**Table S3.** Primers used to validate novel splice junctions and unannotated transcripts using iQ SYBR Green Supermix (Bio-Rad).

| **Description of Primer** | **Sequence** |
| --- | --- |
| *fn1*_exon18_forward | ATGCAGTTAATCGTGGACAAGAGAGTGAA |
| *fn1*_exon21_reverse | ATGCTGCCAGACTCGGATATGACTTC |
| *fn1*_exon23_forward | CAGCGTGTATGCAGTAAAAGGGGAAGA |
| *fn1*_exon25_reverse | CGGGAGAATATCGTACCAGGAAACTTGA |
| *hpdl*_forward | CATCCATTTGCTGCTCGAGGGTTG |
| *hpdl*_reverse | GGCTTACATTCCCAACCACAGACTTTACTA |
| *gata3*_forward | GCCACTCCAGTCATATGCTAACCACAC |
| *gata3*_reverse | GCTCCTTTAGTCCTTCATGCTCCTTTGTA |
| *myl6*_exon2_forward | TGCGACTACTCCGACGACCAGATT |
| *myl6*_exon3_reverse | CCCAAAACCTTCATCACCTCAGCAT |
| intergenic_*tmtc2*_*slc6a15*_forward | CAGGCTTGGCACATGCACAGTAGAG |
| intergenic_*tmtc2*_*slc6a15*_reverse | AACCAATGGAACTCTGTGCCCTCTG |
| *loc100124861*_forward | TTAAATACCCCCCGCCAGTGTGTGT |
| *loc100124861*_reverse | CGCCCTGTTCTGTTCATCATTCCAA |
| *loc100145636*_forward | GGGAGCGGATACTGAGCCATTTTGATA |
| *loc100145636*_reverse | GCCCCCGCCATTACACAAGAGG |
| *pop1*_forward | CAGAAATGTCGAACGCAAAA |
| *pop1*_reverse | CACCCCTTCCTTTACCACCT |
| TTpA057m17_forward | GGGCTCCTATGATCCAAAAA |
| TTpA057m17_reverse | GCAGACCACGATATCCCATAA |
| comp29928_forward | GACCGTCCCTTTACCATTCAACACAA |
| comp29928_reverse | TTCCAGTATCTAGAGCCATCCACAAAAAT |
| comp697_forward | TCTGGGGAAAAGGAATGTTG |
| comp697_reverse | CCCAGTCAGATCCTGGAACA |
| comp39806_forward | TTTTCTGCCCTTGTGCTTCT |
| comp39806_reverse | CCAAGAGCTGCCCTGTAATC |
| *xbp1*_exon2_forward | TCGGGACAGGAAAAAAGCCAGAAT |
| *xbp1*_exon3_forward | TGAAAACCAGGAGCTACGCCAAAGA |
| *xbp1*_exon4_reverse | TGTCAGGGCTGTCAGGATCCATGTAG |
| *xbp1*_exon5_reverse | CAGGAGAAGATGGGGAGGAGGATATG |
| *bend5*_exon3_forward | GGCAGCTGTGGTTCCAAGGGTTT |
| *bend5*_exon4_reverse | AATTTCAGGCTCAGGCTCAGGATCA |
| *bend5*_exon4_forward | AGCTCCTGTGCTGGACAAAT |
| *bend5*_exon5_reverse | AGGTGAGAGTGGTGGTTTGG |
| *bend5*_exon5_forward | AAAAATGGCACCAACTCCAG |
| *bend5*_exon6_reverse | ACTTTCGACAGCCTTTGTGC |
| *cltb*_exon3_forward | AACGGAGCAGGAGTGGCGAGAAA |
| *cltb*_exon4_reverse | TTTTGACTGTTTGCTGCTCTTAGGATTGA |
| intergenic_*slc35d1*_*il12rb2*_forward | CCTGGATGATTTTGACCTTGAATATTGTAA |
| intergenic_*slc35d1*_*il12rb2*_reverse | AAAGCAATAGACCAGTTCGCCTCAGG |
| *myl6*_exon4_forward | GAGCAATTCCTCCCCATGAT |
| *myl6*_exon5_reverse | AATGCAACCATTAGCATCCTC |
| comp16945_forward | TGATGGTGGTTAACGGCGGGATATA |
| comp16945_reverse | AGCGGAACGGGAAGGCGACTG |
| comp26746_forward | ATGCGTCTGTTTGCCCGGTTATC |
| comp26746_reverse | TCGCGTTGCTGCTCTTTGTTCTTG |
