# Supplementary material for: RNA sequencing reveals a diverse and dynamic repertoire of the Xenopus tropicalis transcriptome over development
Source: HighWire-hosted journal article supplement (doi:10.1101/gr.141424.112), 2012-09-07
Supplement: GENOME_2012_141424.zip [file Table S4 v2.docx]

**Table S4.** Primers used to validate unannotated transcribed sequences using Herculase II Fusion DNA Polymerase (Agilent) as well as the annealing temperature, T, for each PCR.

| **Description of Primer** | **T (oC)** | **Sequence** |
| --- | --- | --- |
| intergenic_*hoxc11*_*hoxc12*_forward | 57-62 | GAGAGAGAGGCAAAATCACGATGGACAT |
| intergenic_*hoxc11*_*hoxc12*_reverse | 57-62 | TGGGCCCTTTTCTCTTTATGACTGG |
| *ccnK*_forward | 63 | CCTCCTAGACTGCCACCCACTCATACA |
| *ccnK*_reverse | 63 | GCCCGAACCAAAACCATTAATAAACCTAC |
| intergenic_*sox10*_*baiap2l2*_forward | 62 | CAGGCTCATGGGGCTTTTTTTTTCT |
| intergenic_*sox10*_*baiap2l2*_reverse | 62 | TCCTGTATGGTAGTAATGCCTGAAAGTATGC |
