# Supplementary figures and images for: RNA sequencing reveals a diverse and dynamic repertoire of the Xenopus tropicalis transcriptome over development
Source: HighWire-hosted journal article supplement (doi:10.1101/gr.141424.112), 2012-09-07

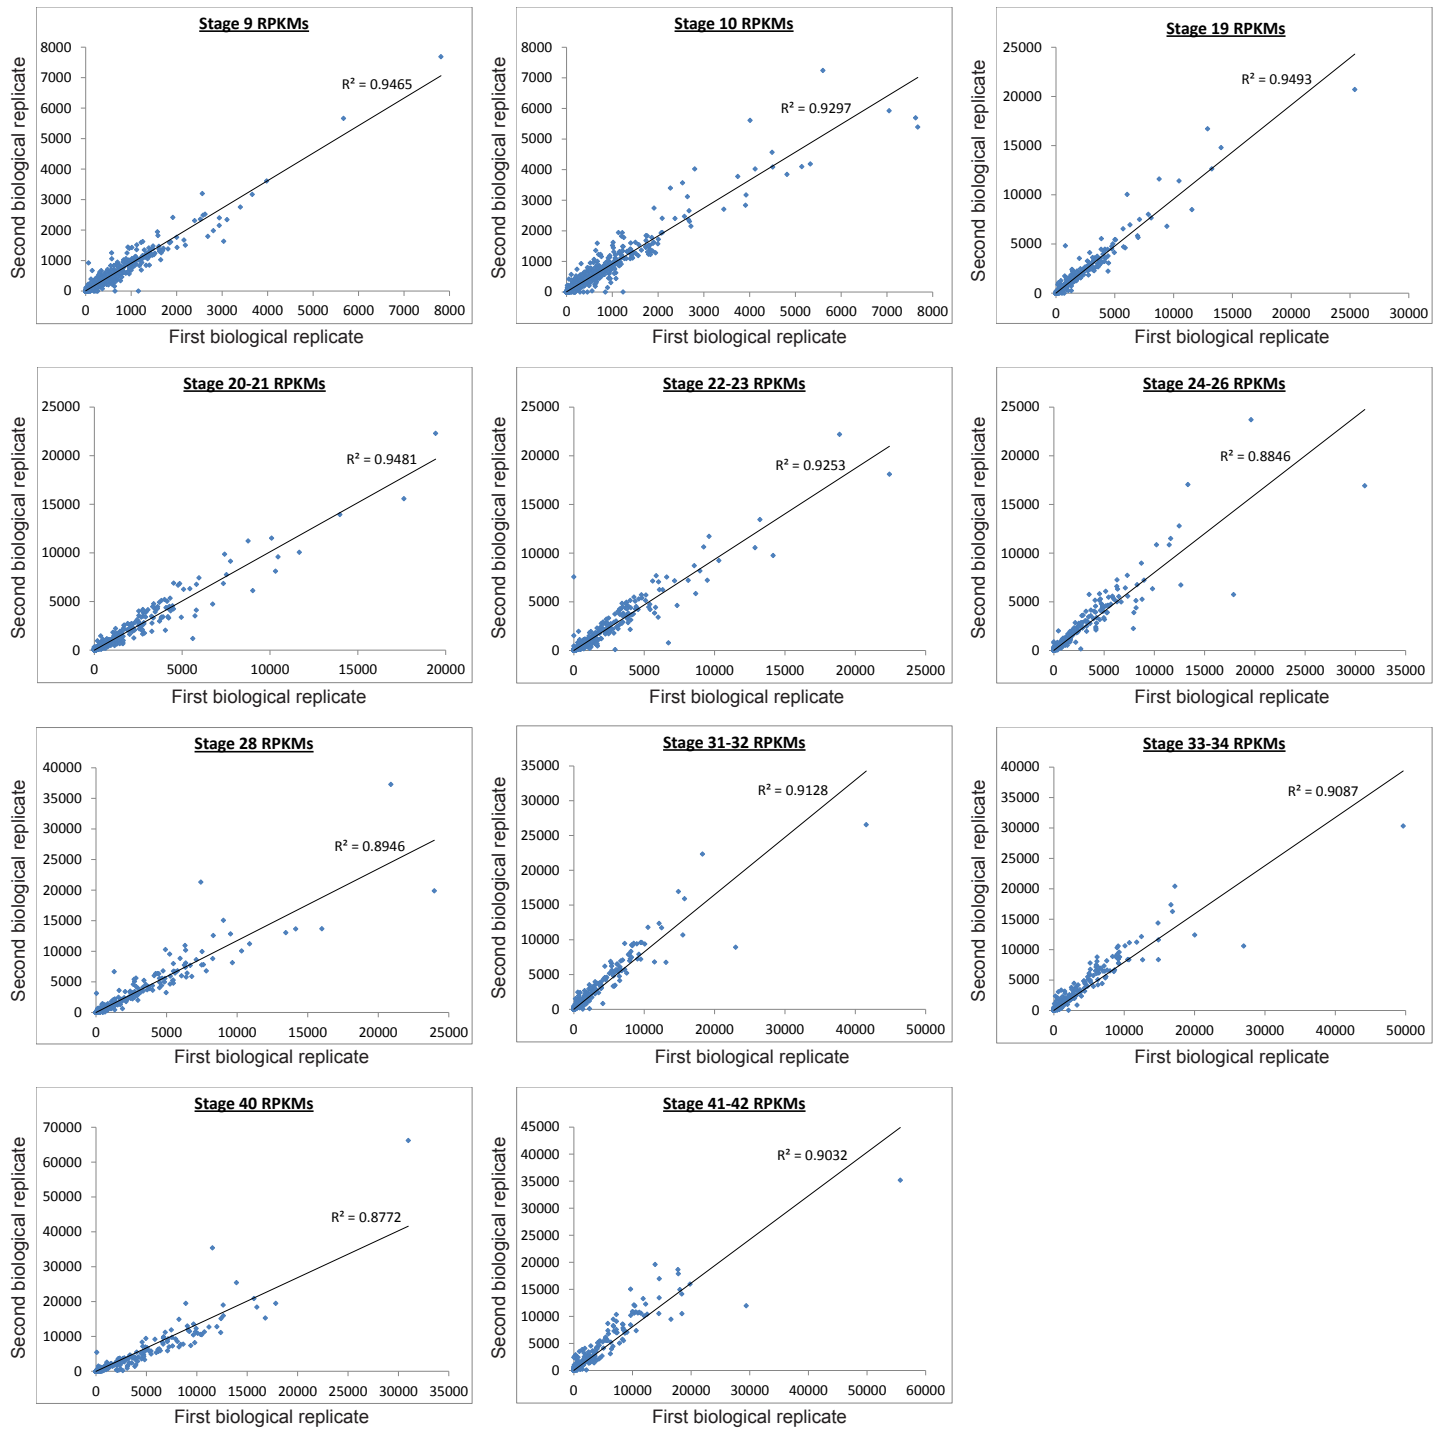

Figure S1

Supplement: GENOME_2012_141424.zip [file Figure S1 v2 - Correlation between replicates.pdf › Figure S1 v2 - Correlation between replicates.pdf]

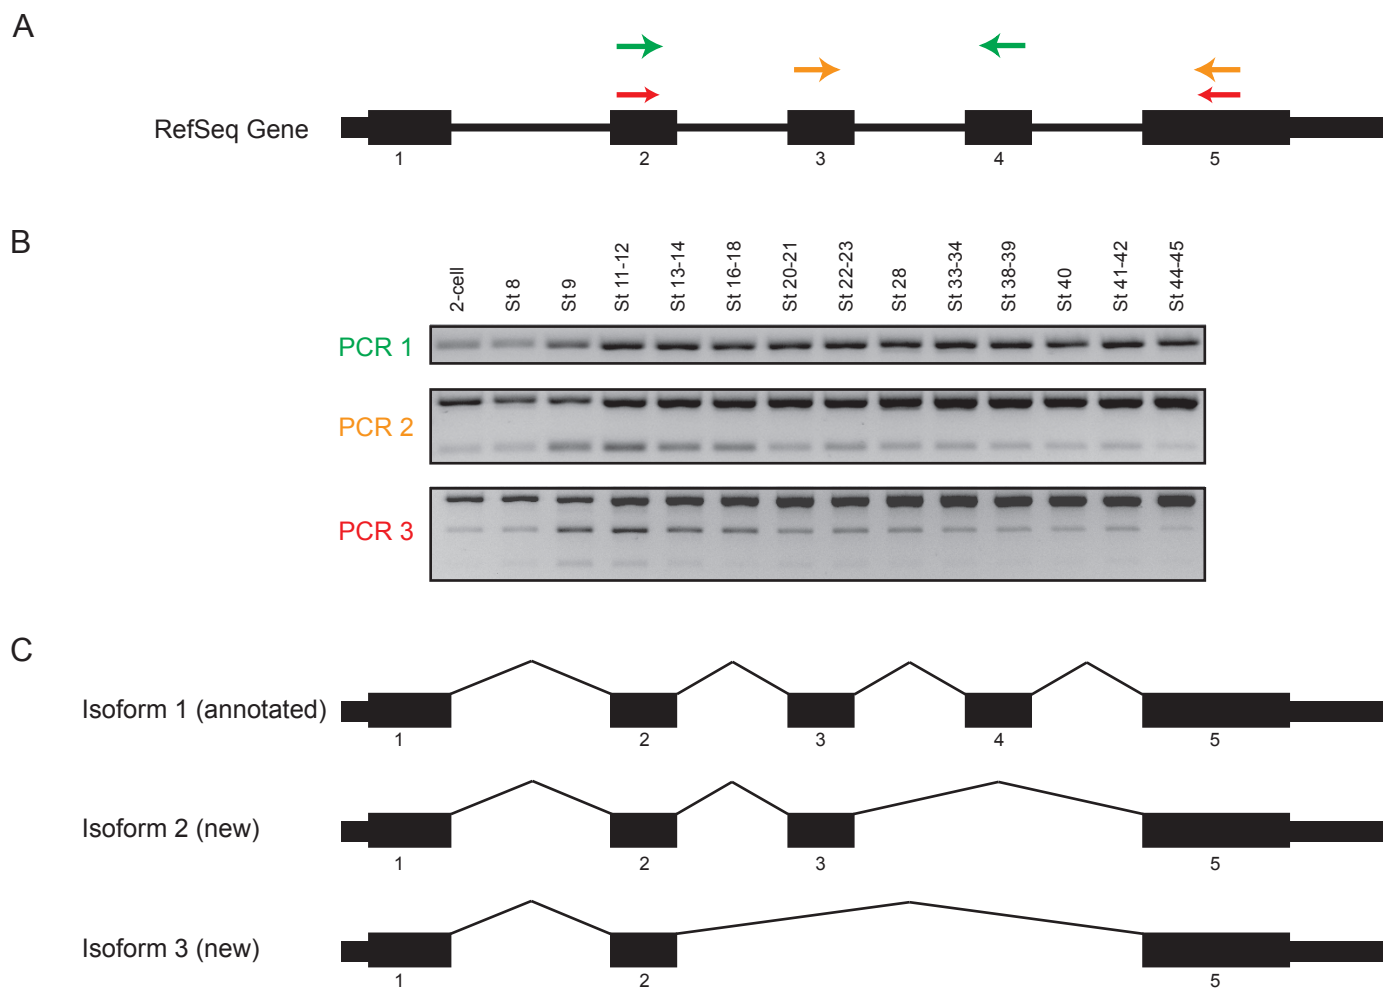

Figure S10

Supplement: GENOME_2012_141424.zip [file Figure S10 - Xtr xbp1.pdf › Figure S10 - Xtr xbp1.pdf]

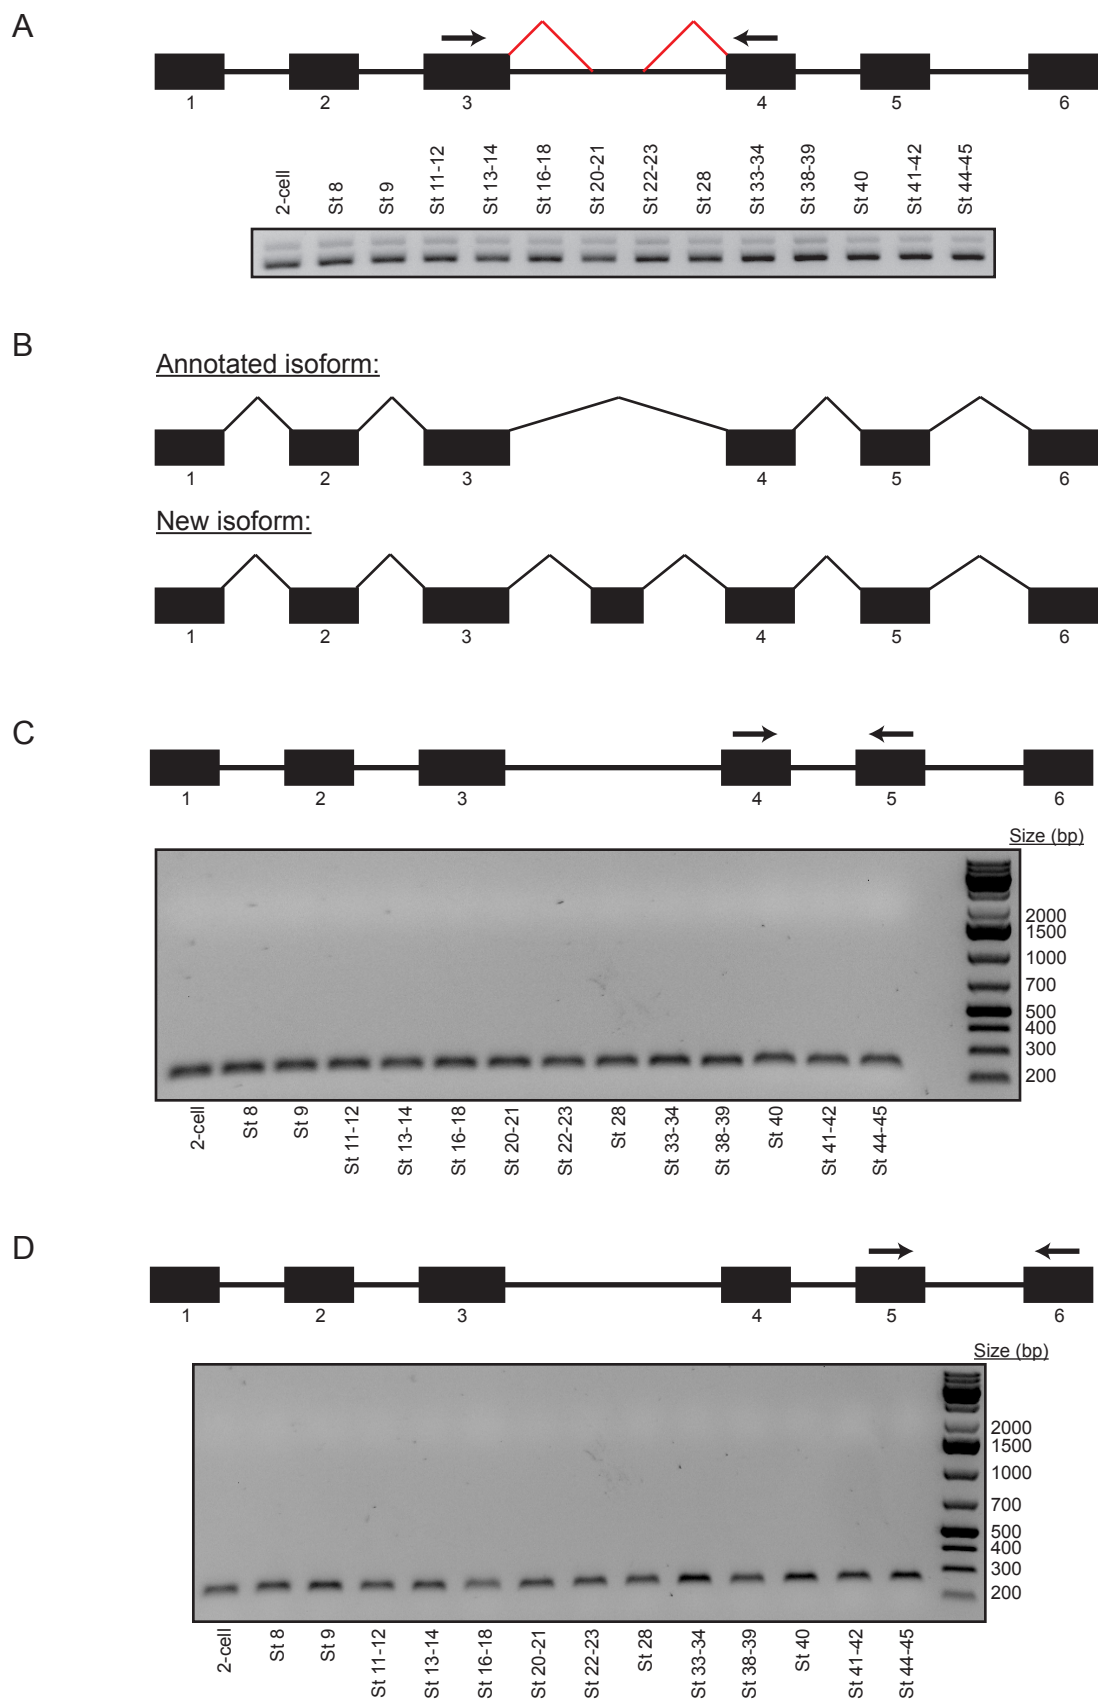

Figure S11

Supplement: GENOME_2012_141424.zip [file Figure S11 v3 - Xtr bend5.pdf › Figure S11 v3 - Xtr bend5.pdf]

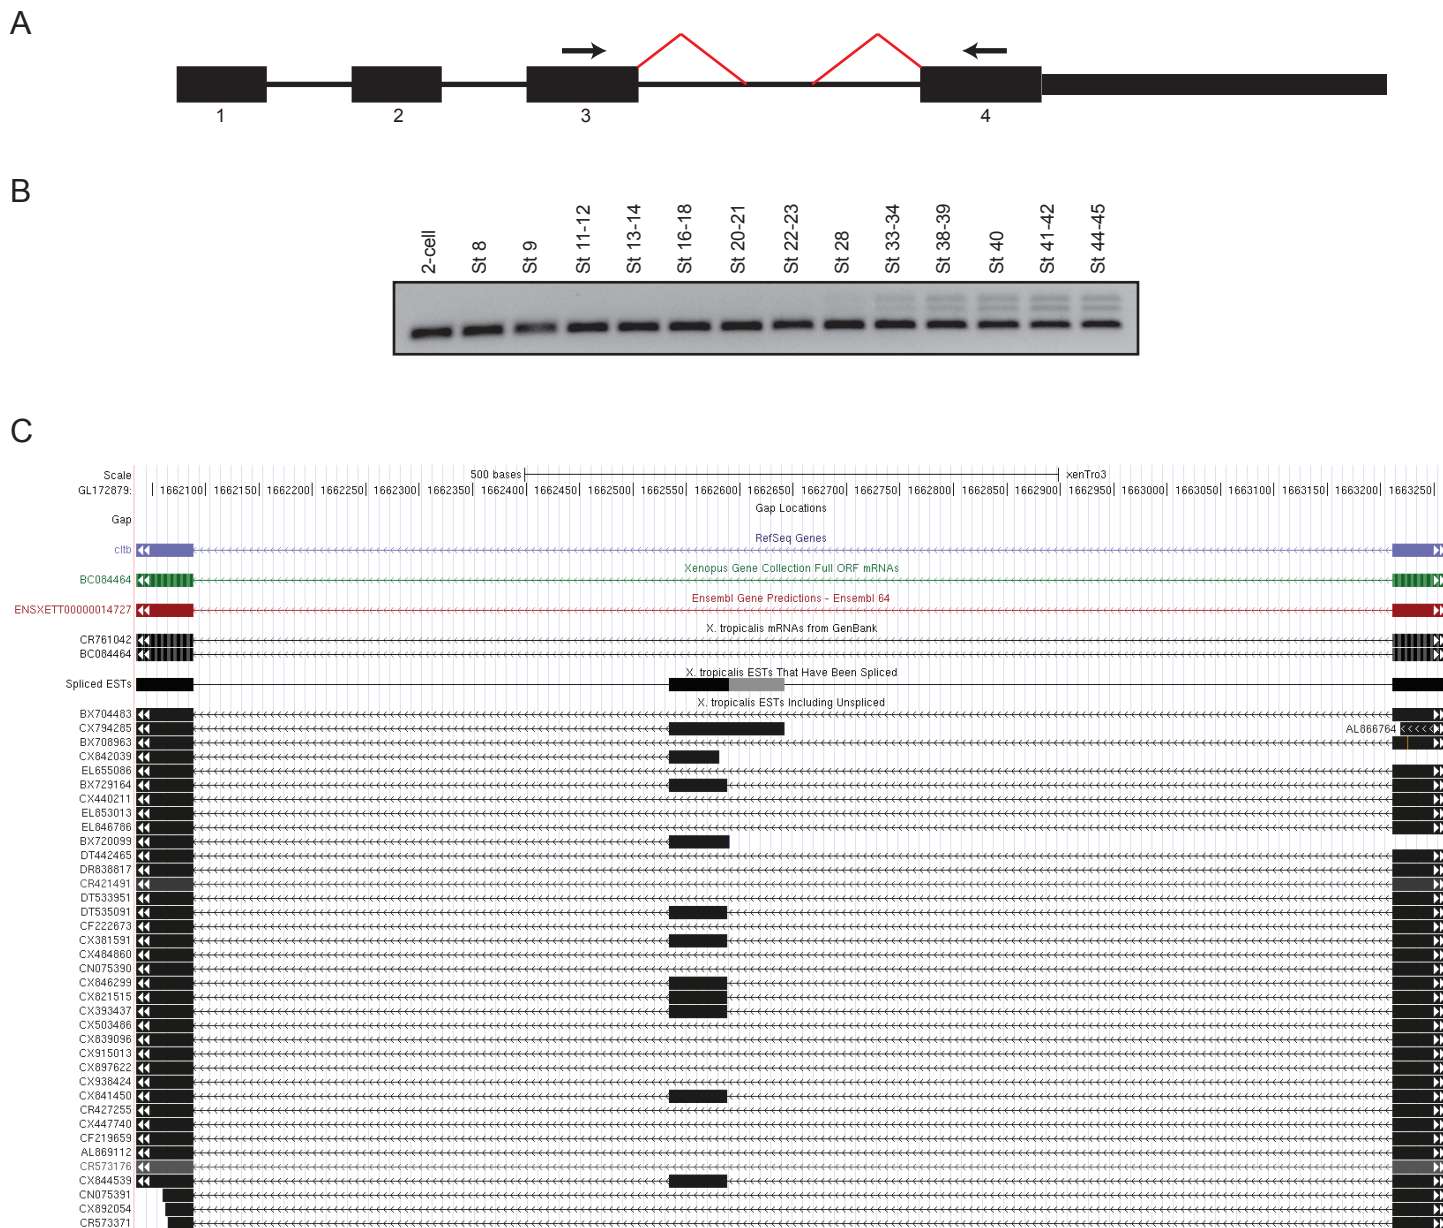

**D** Novel, detected in RNA-seq:

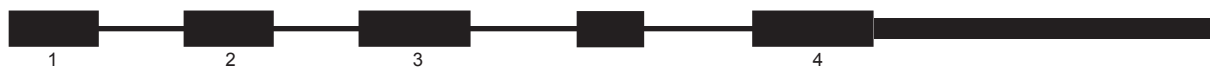

Novel, not detected in RNA-seq:

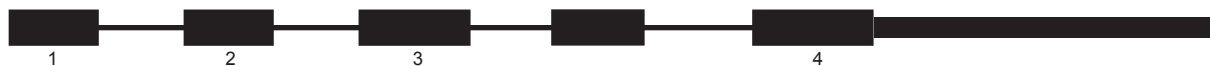

Figure S12

Supplement: GENOME_2012_141424.zip [file Figure S12 v2 - Xtr cltb.pdf › Figure S12 v2 - Xtr cltb.pdf]

A

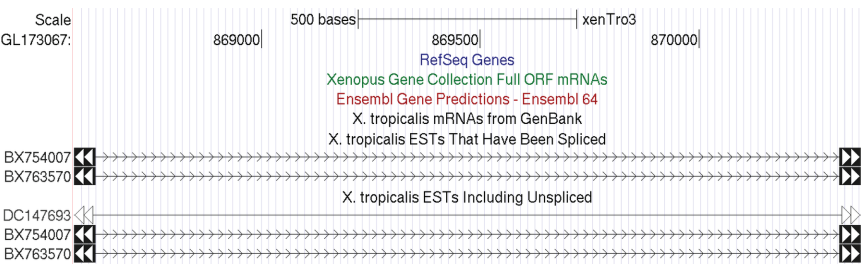

B

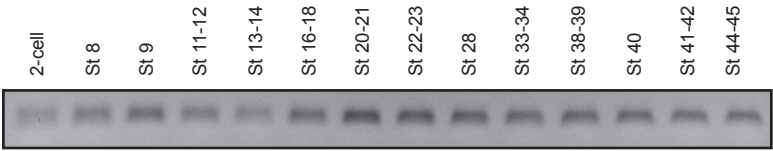

Figure S13

Supplement: GENOME_2012_141424.zip [file Figure S13 - Intergenic2.pdf › Figure S13 - Intergenic2.pdf]

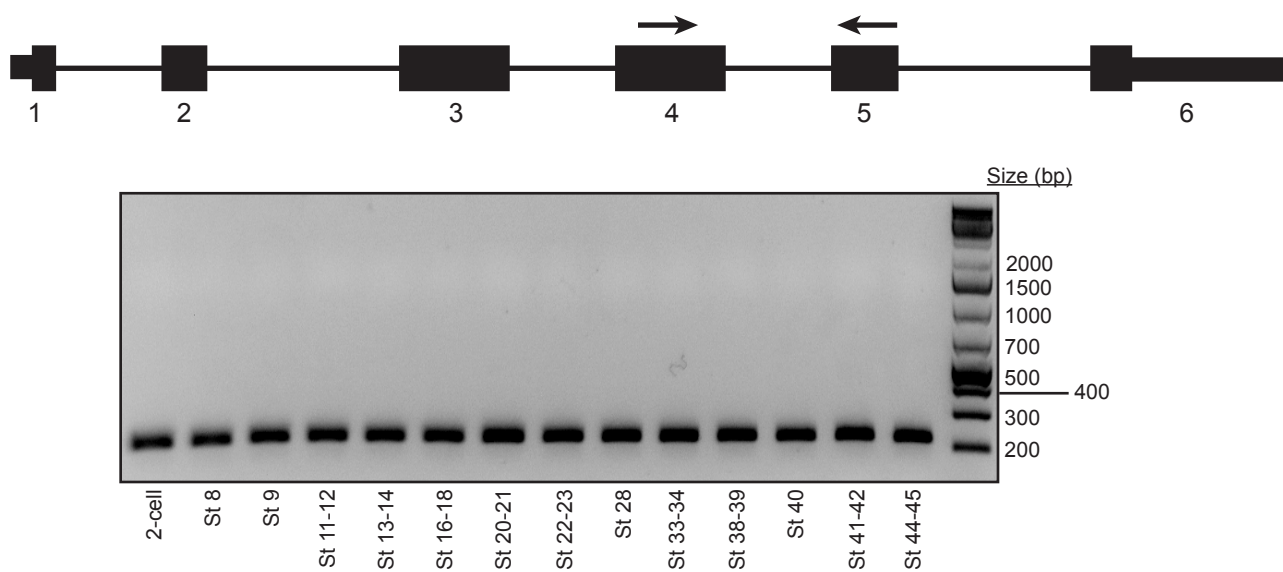

Figure S14

Supplement: GENOME_2012_141424.zip [file Figure S14 - Negative control for myl6.pdf › Figure S14 - Negative control for myl6.pdf]

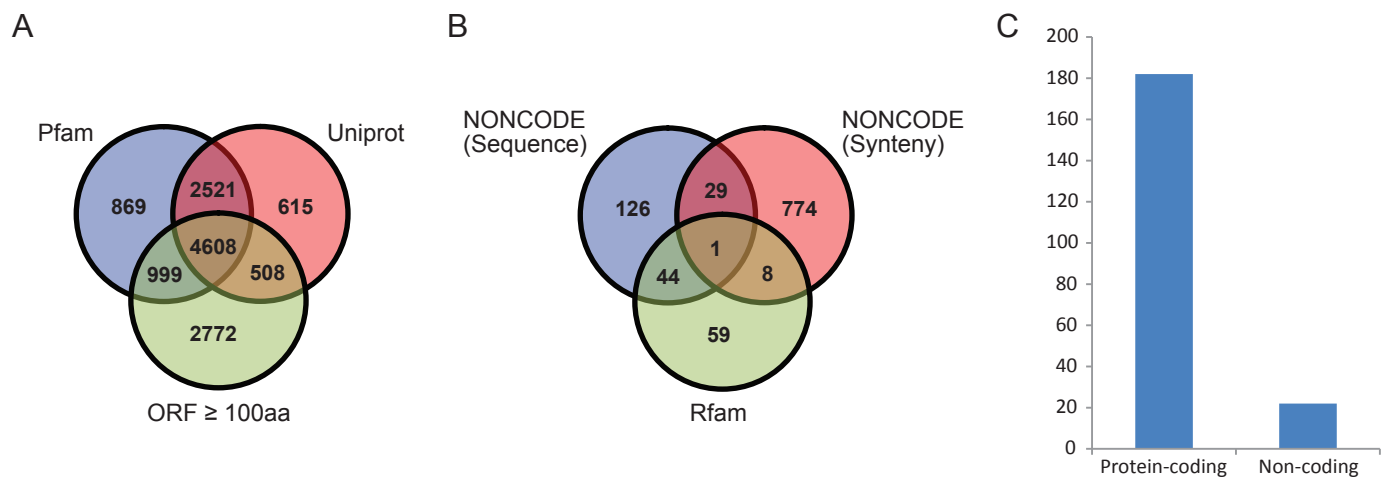

Figure S15

Supplement: GENOME_2012_141424.zip [file Figure S15 - Unannotated protein-coding and non-coding contigs.pdf › Figure S15 - Unannotated protein-coding and non-coding contigs.pdf]

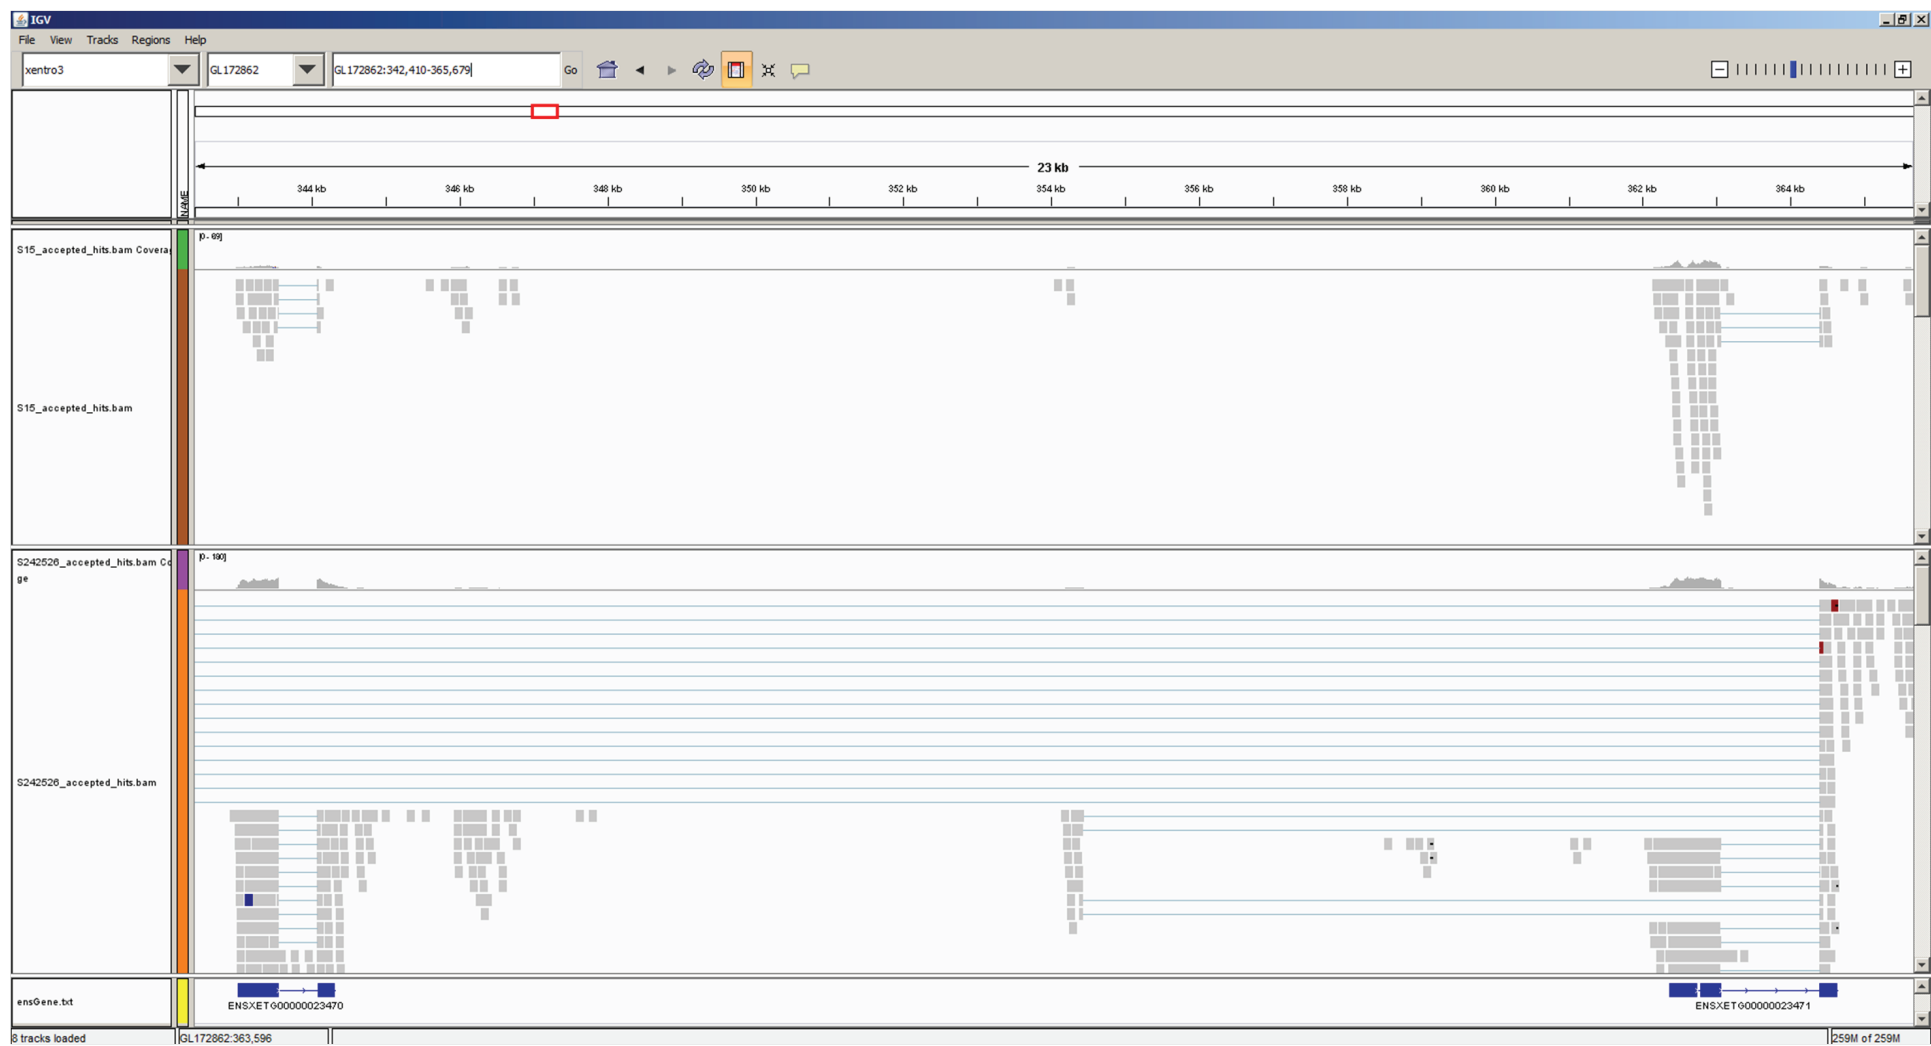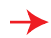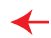

Figure S16

Supplement: GENOME_2012_141424.zip [file Figure S16 - Hotair IGV.pdf › Figure S16 - Hotair IGV.pdf]

A

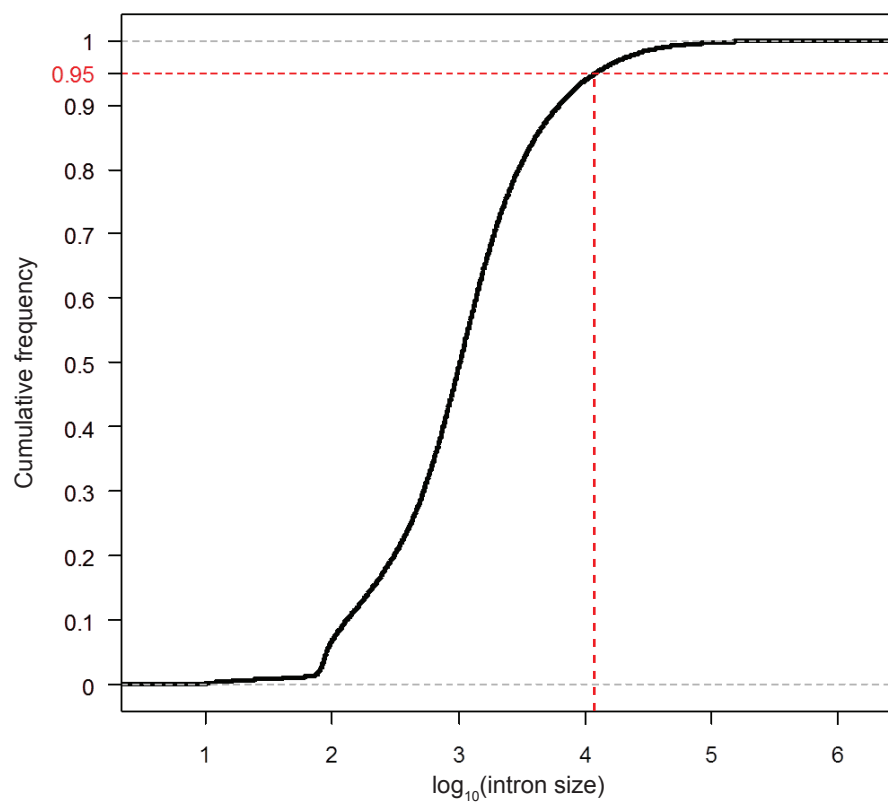

B

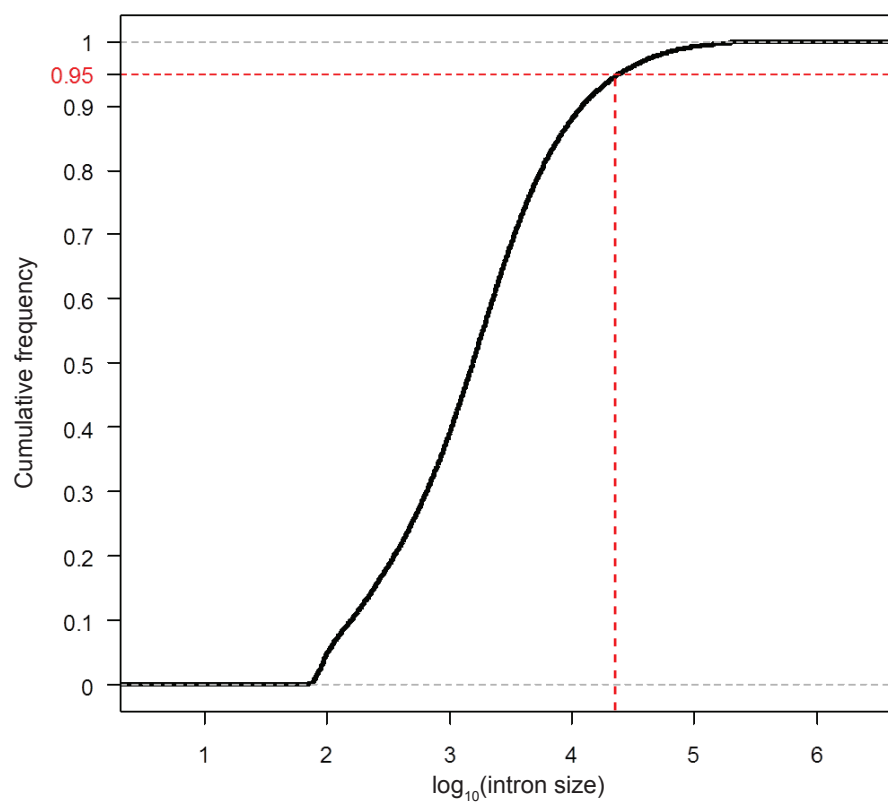

Figure S17

Supplement: GENOME_2012_141424.zip [file Figure S17 - Intron CDF.pdf › Figure S17 - Intron CDF.pdf]

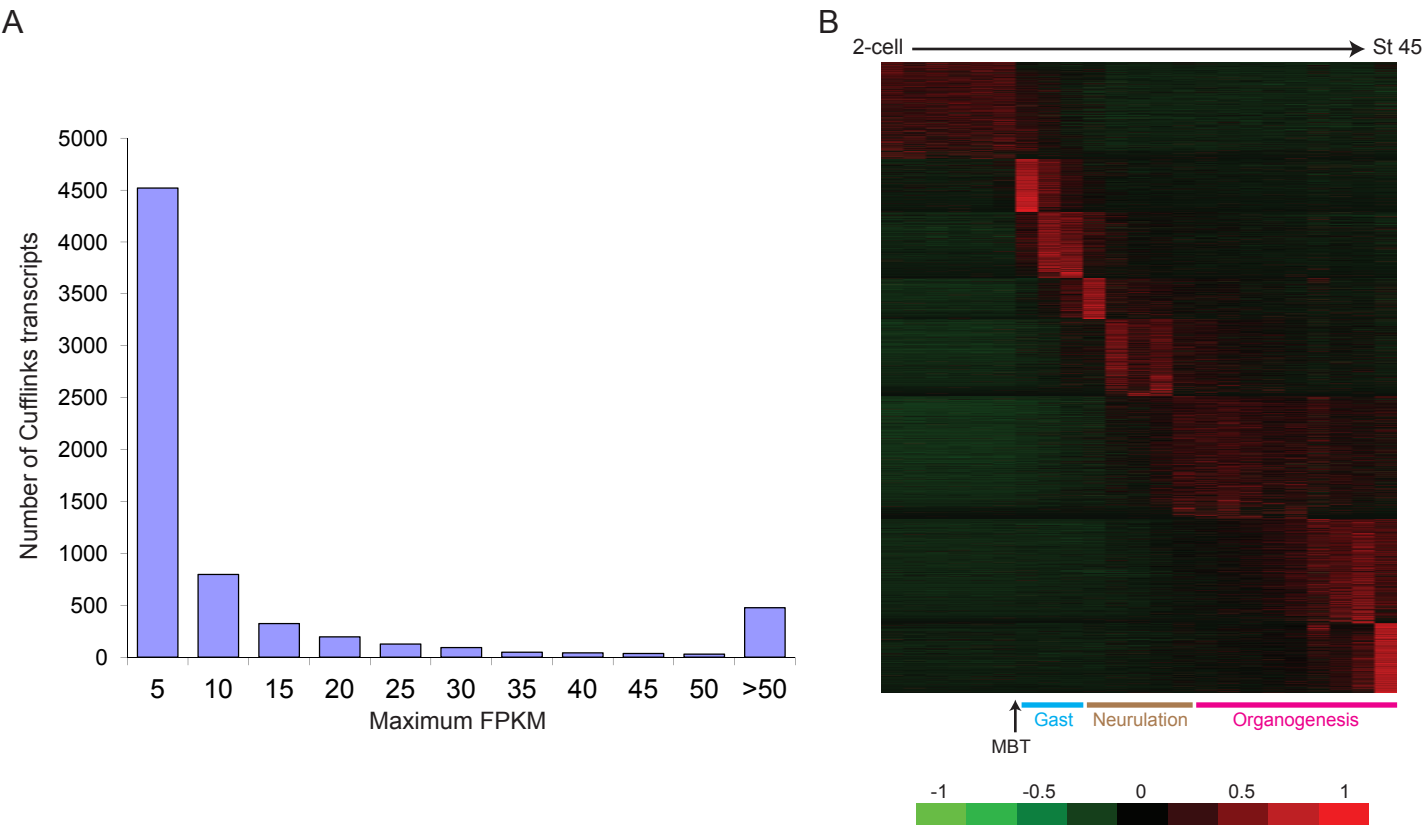

Figure S18

Supplement: GENOME_2012_141424.zip [file Figure S18 v2 - ncRNA FPKM.pdf › Figure S18 v2 - ncRNA FPKM.pdf]

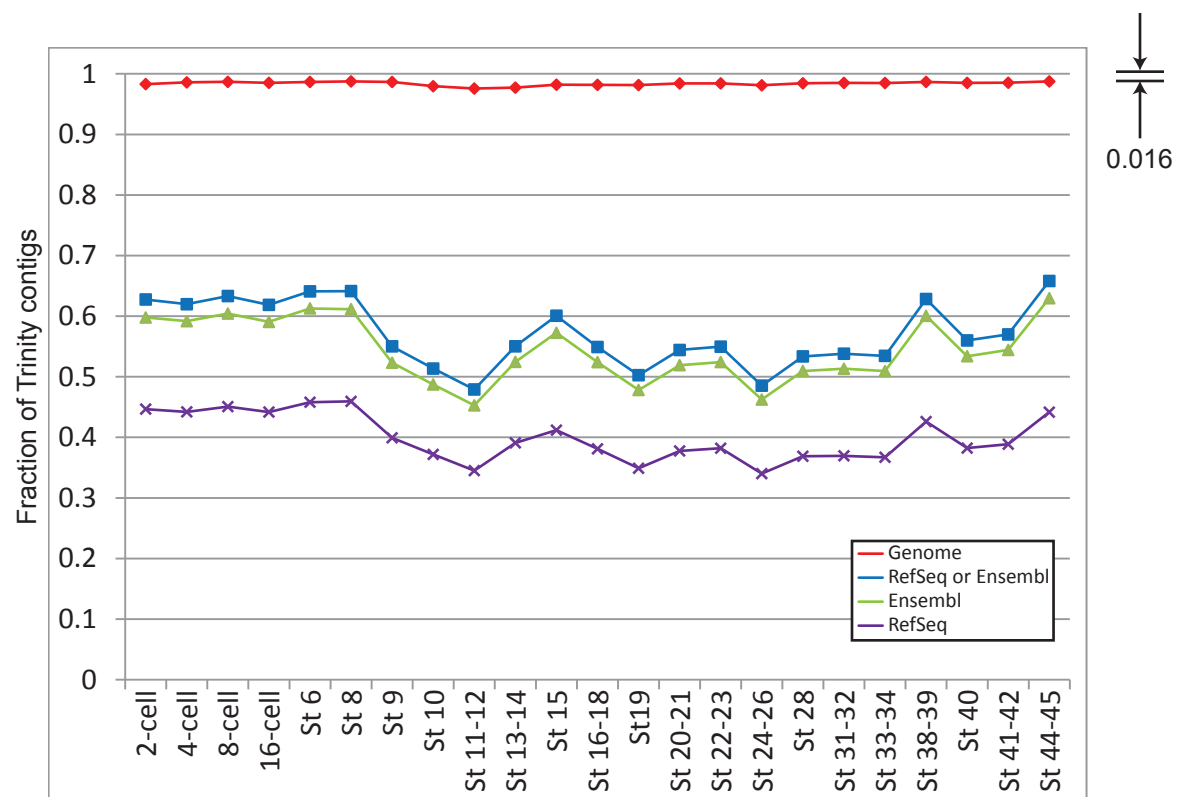

Figure S19

Supplement: GENOME_2012_141424.zip [file Figure S19 v2 - Trinity BLAST against genome RS ENS.pdf › Figure S19 v2 - Trinity BLAST against genome RS ENS.pdf]

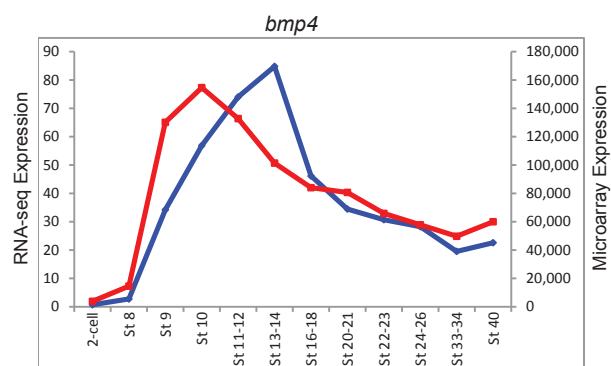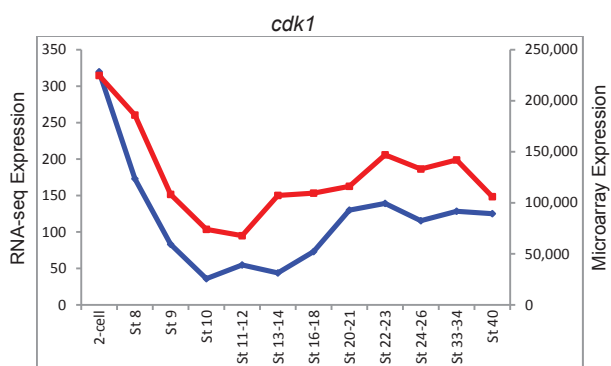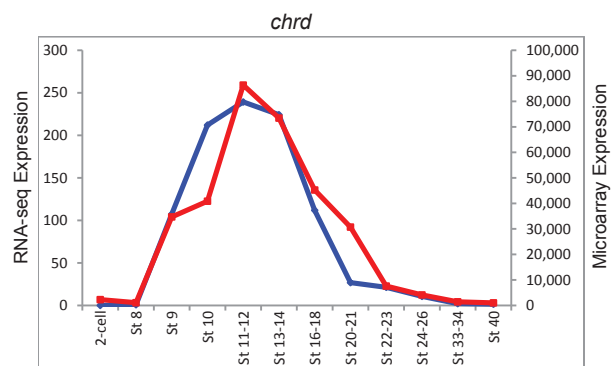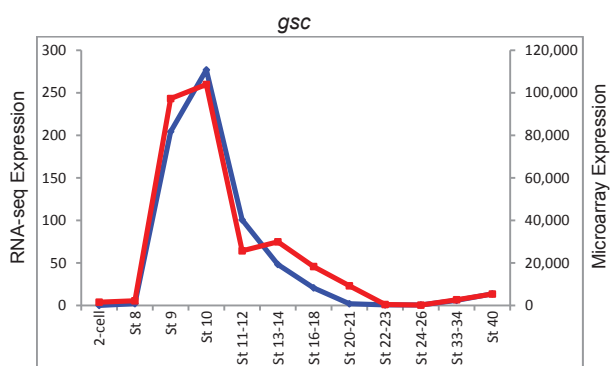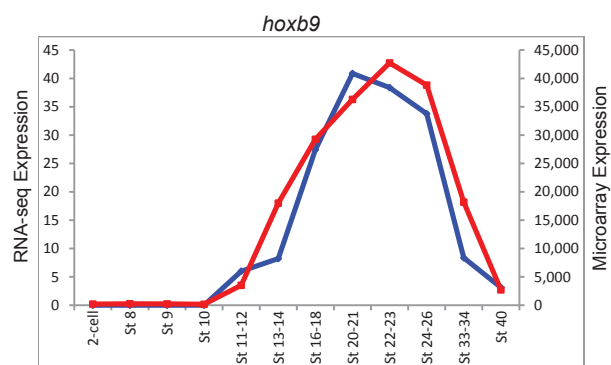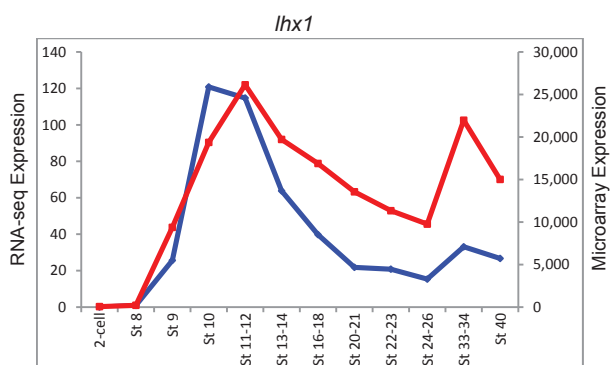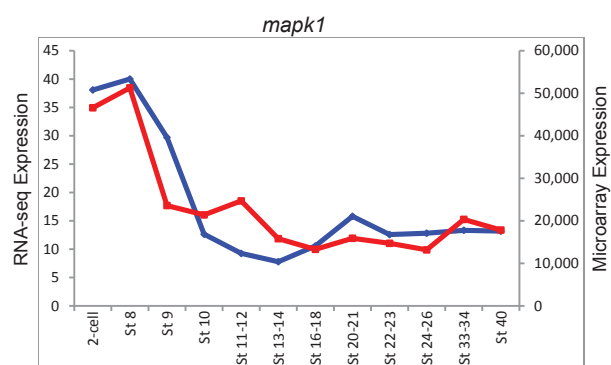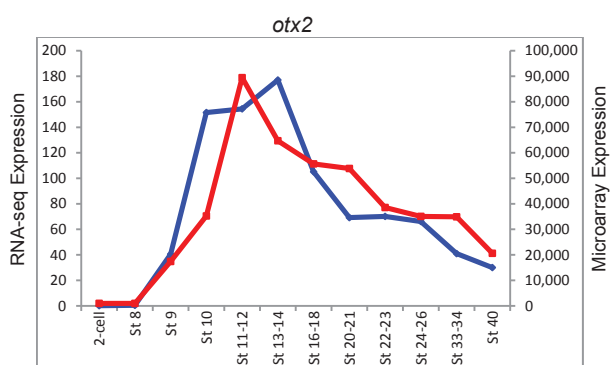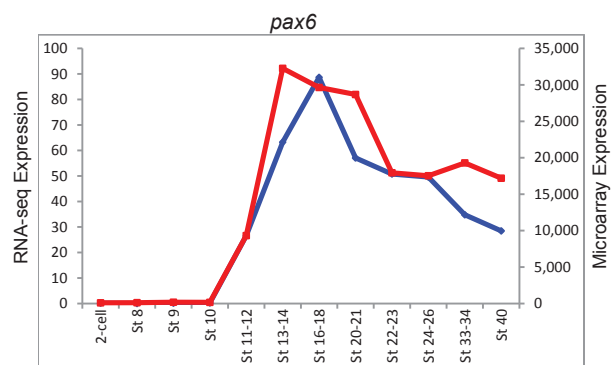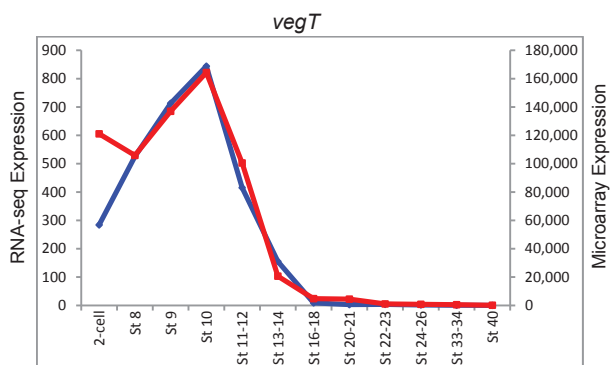

Figure S2

Supplement: GENOME_2012_141424.zip [file Figure S2 v2 - Examples of agreement between MA and RNASeq.pdf › Figure S2 v2 - Examples of agreement between MA and RNASeq.pdf]

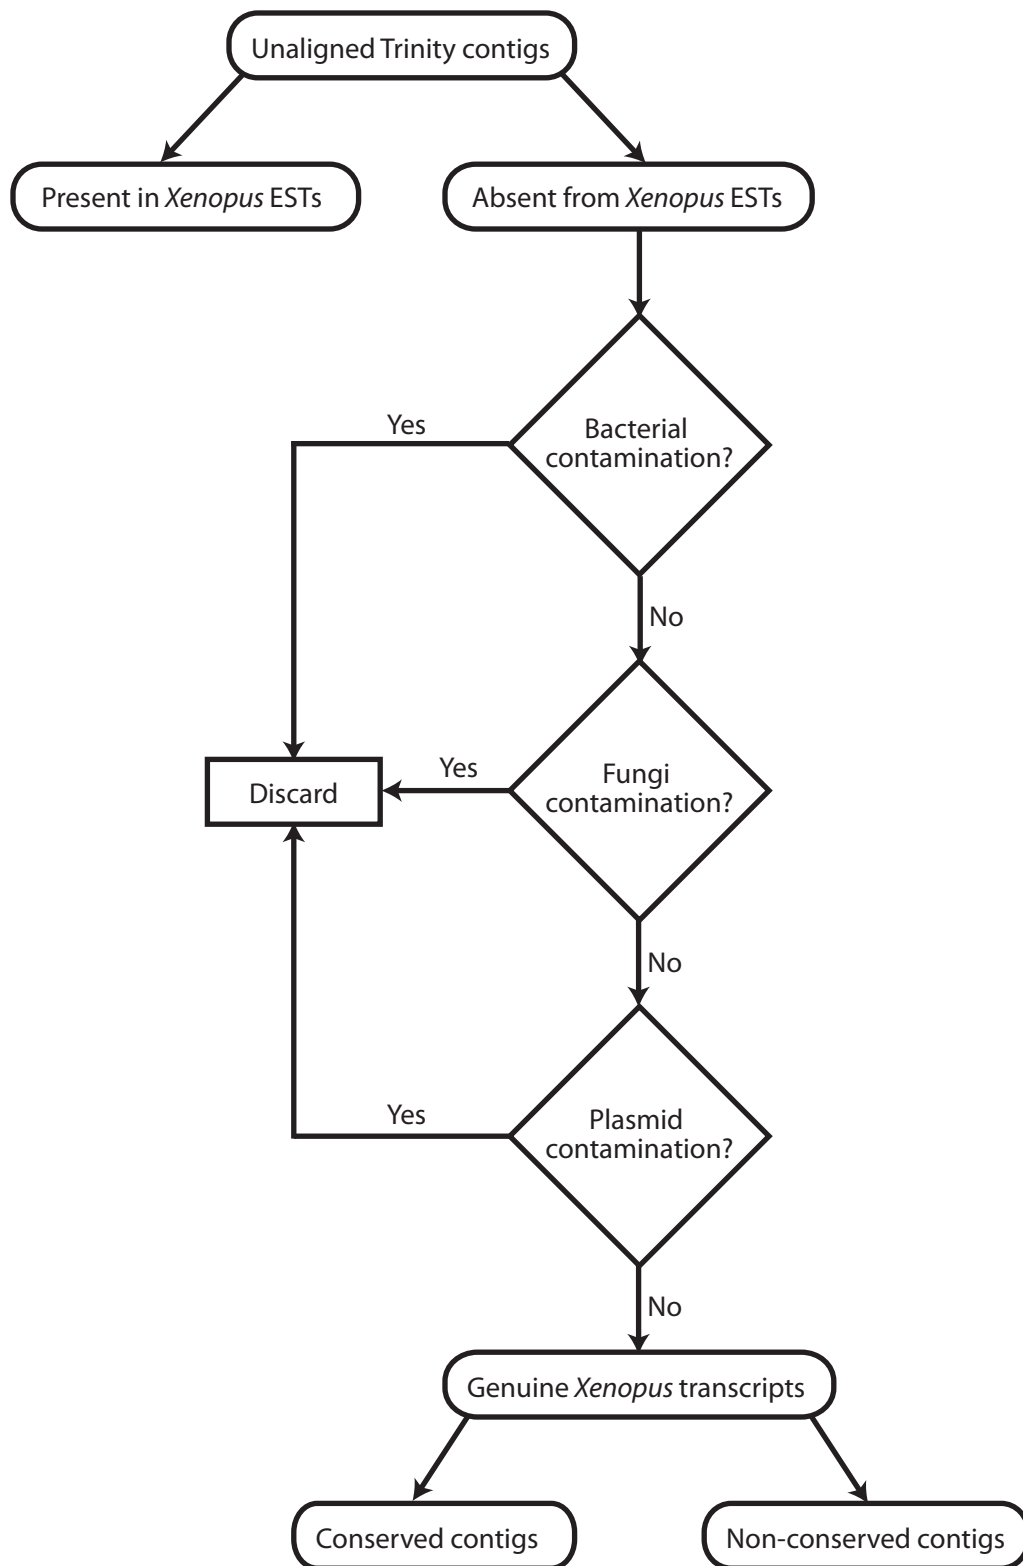

Figure S20

Supplement: GENOME_2012_141424.zip [file Figure S20 v2 - Checking contamination.pdf › Figure S20 v2 - Checking contamination.pdf]

A

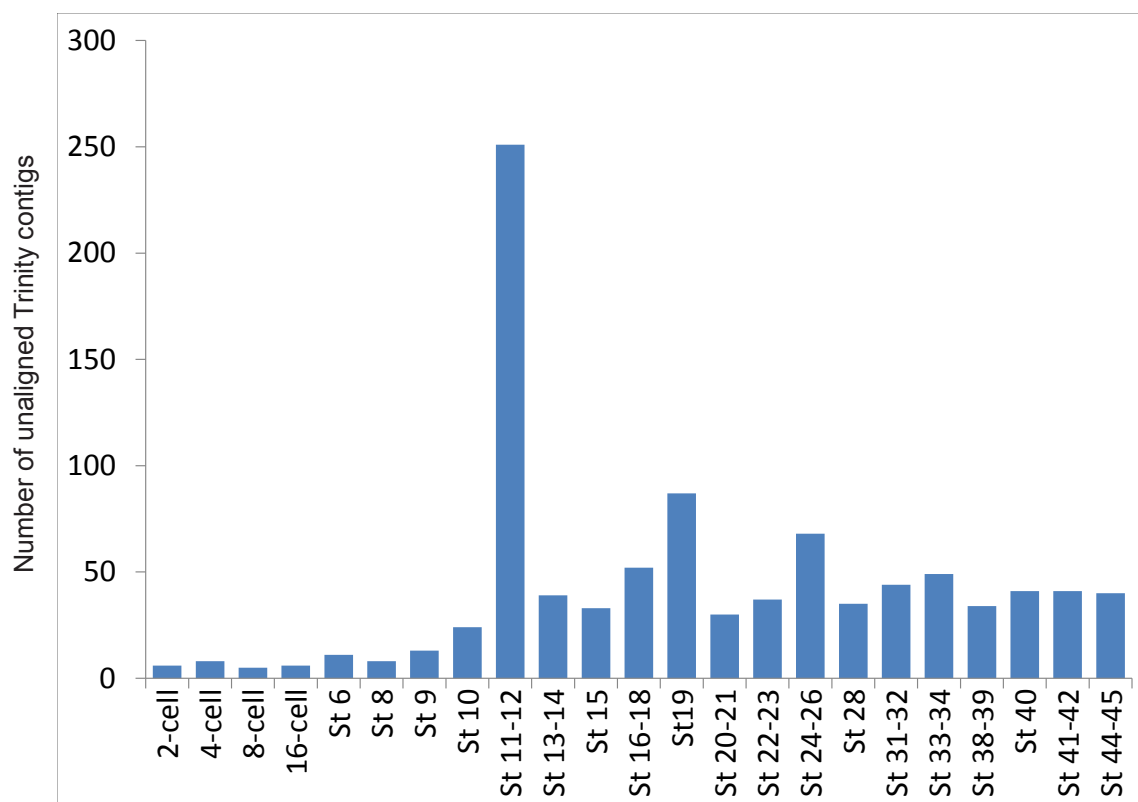

B

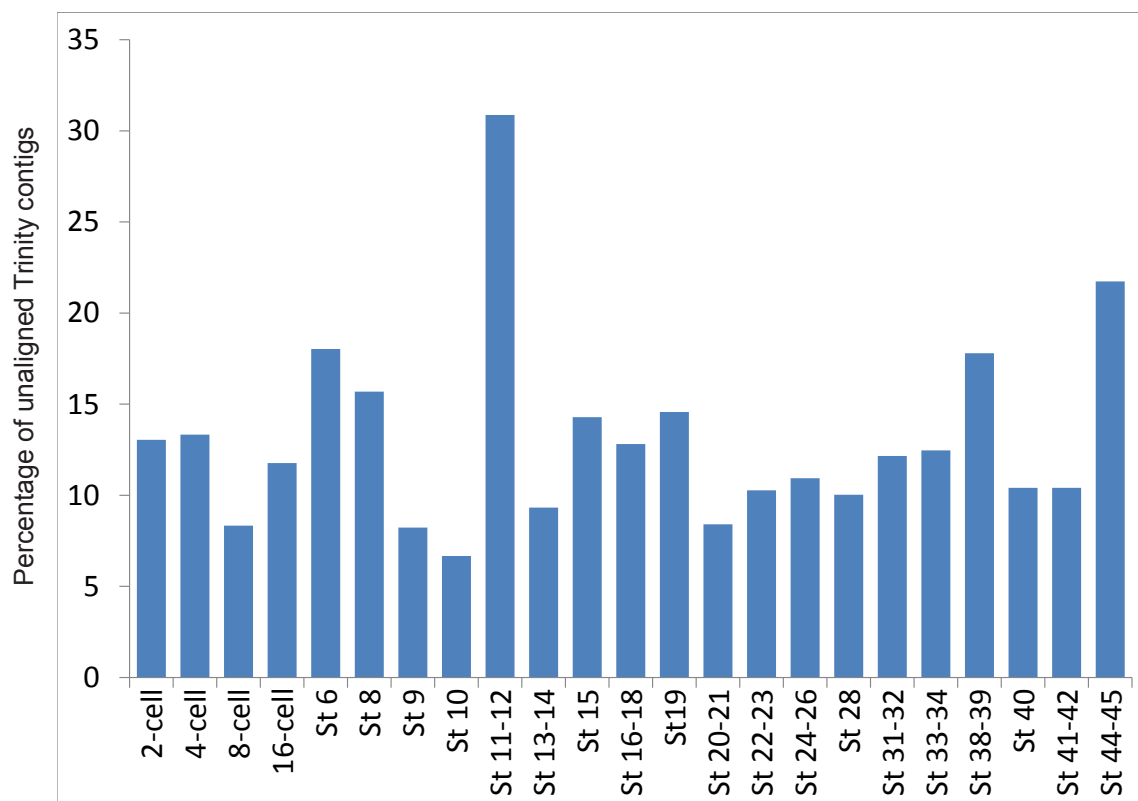

Figure S21

Supplement: GENOME_2012_141424.zip [file Figure S21 - Unaligned contigs with protein coding potential.pdf › Figure S21 - Unaligned contigs with protein coding potential.pdf]

A

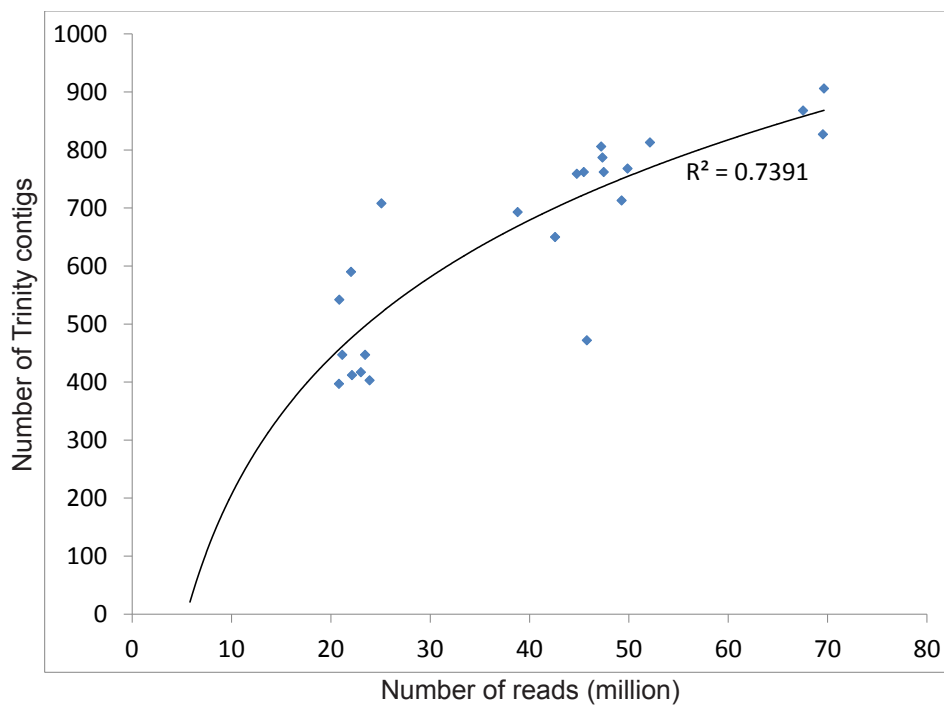

B

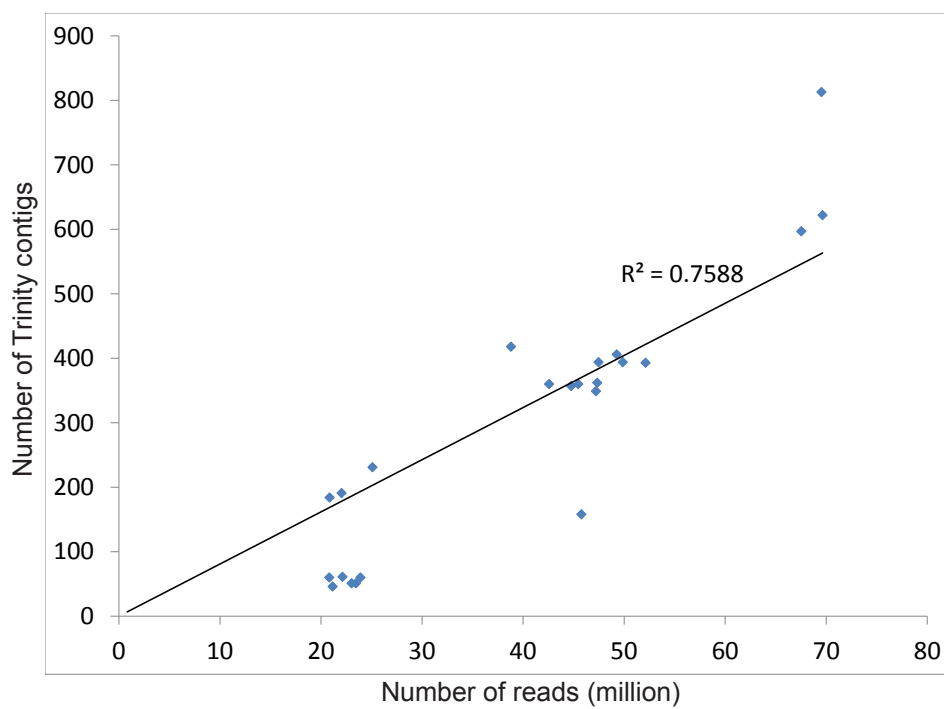

Figure S22

Supplement: GENOME_2012_141424.zip [file Figure S22 v2 - Trinity NotinGenome vs ReadNum.pdf › Figure S22 v2 - Trinity NotinGenome vs ReadNum.pdf]

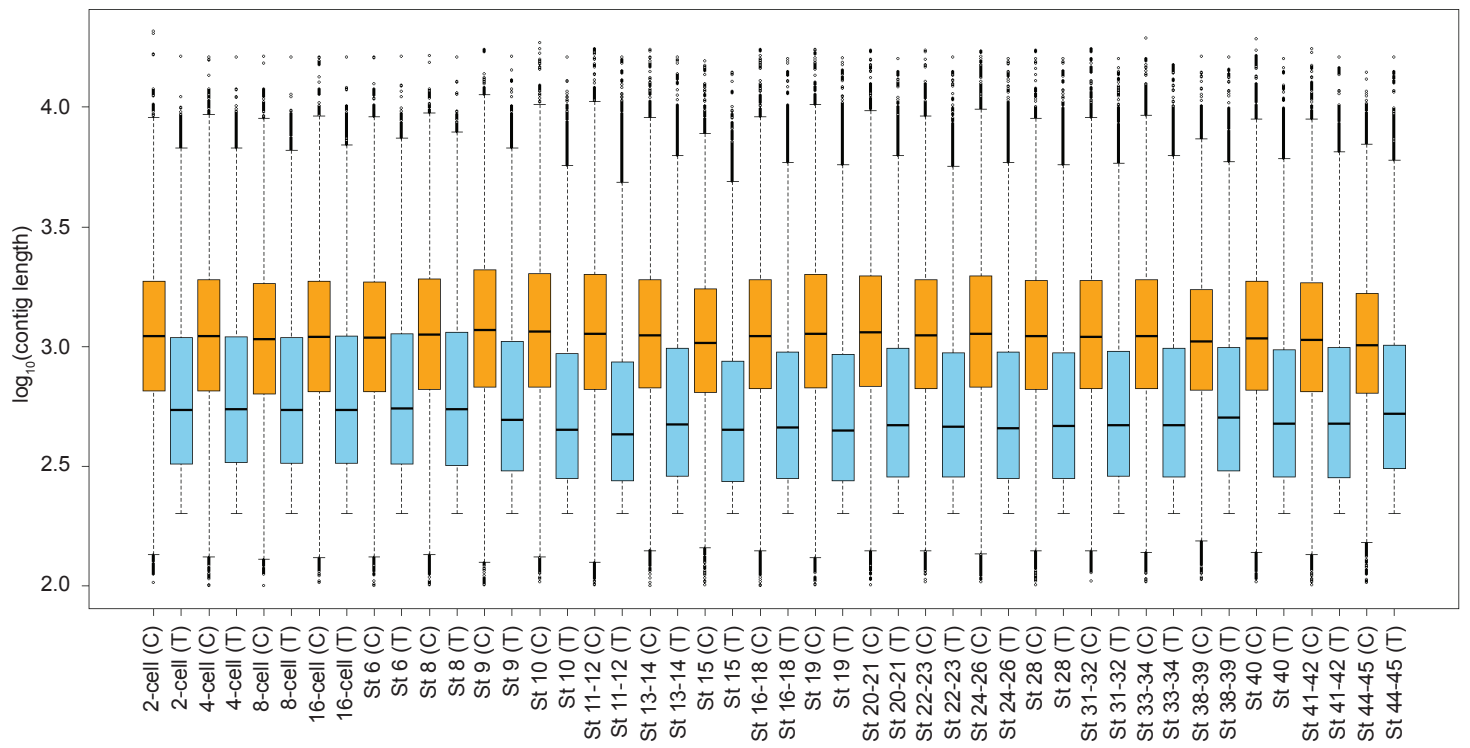

Figure S23

Supplement: GENOME_2012_141424.zip [file Figure S23 - Distribution of contig lengths.pdf › Figure S23 - Distribution of contig lengths.pdf]

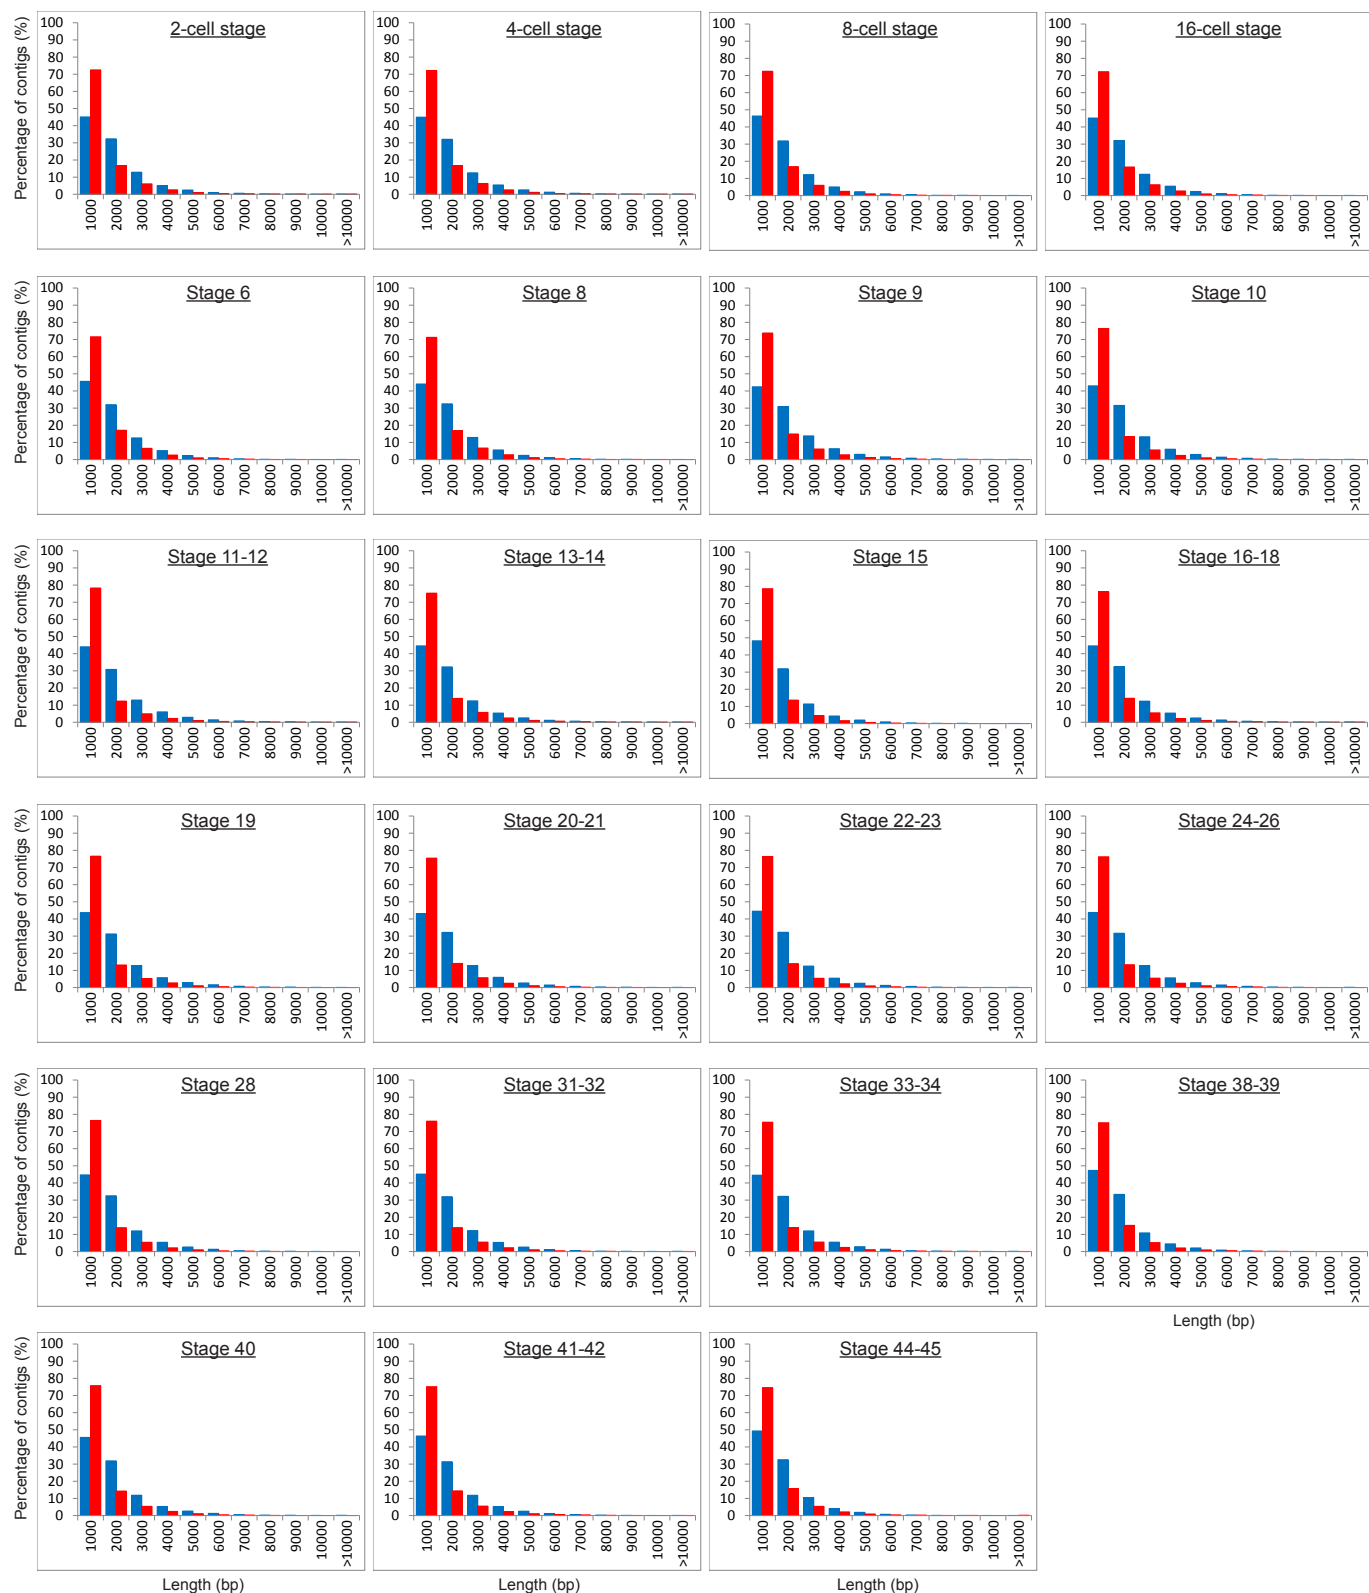

Figure S24

Supplement: GENOME_2012_141424.zip [file Figure S24 - Length distributions of assembled contigs.pdf › Figure S24 - Length distributions of assembled contigs.pdf]

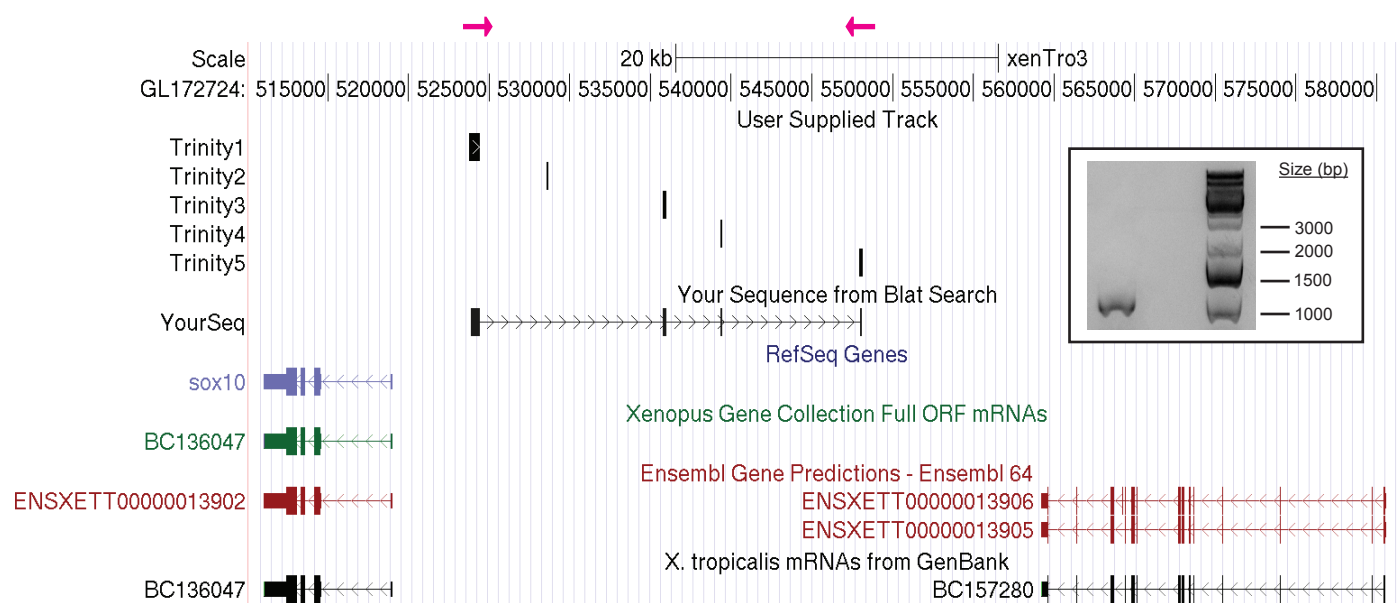

Figure S25

Supplement: GENOME_2012_141424.zip [file Figure S25 v2 - Sox10.pdf › Figure S25 v2 - Sox10.pdf]

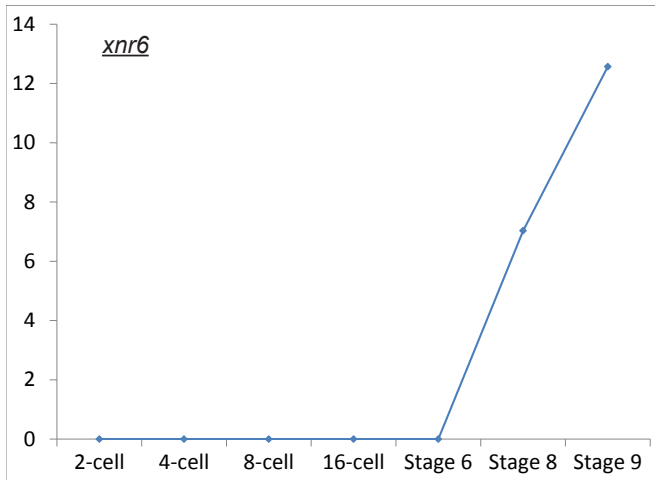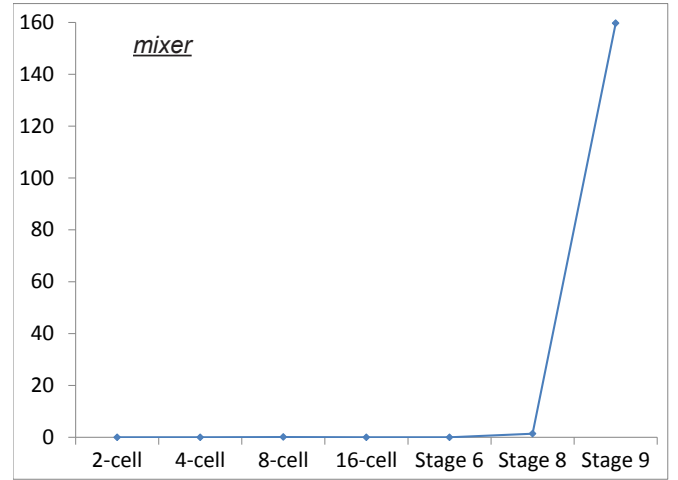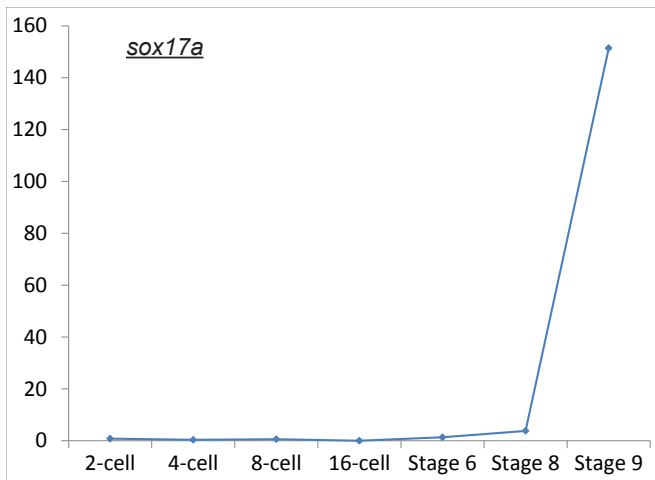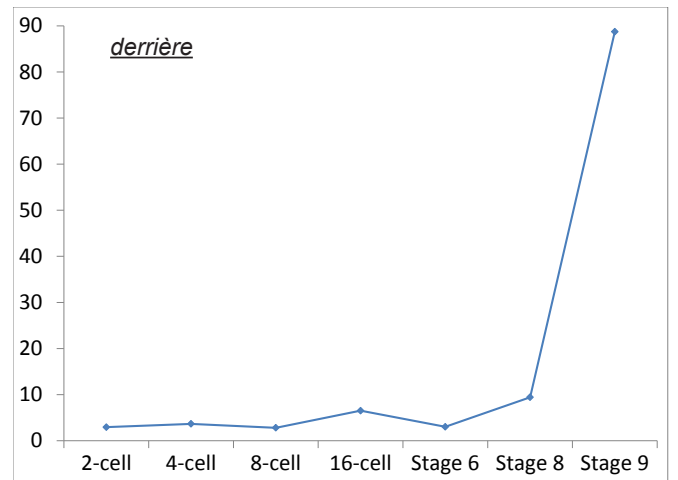

Figure S26

Supplement: GENOME_2012_141424.zip [file Figure S26 v2 - Known Pre-MBT genes.pdf › Figure S26 v2 - Known Pre-MBT genes.pdf]

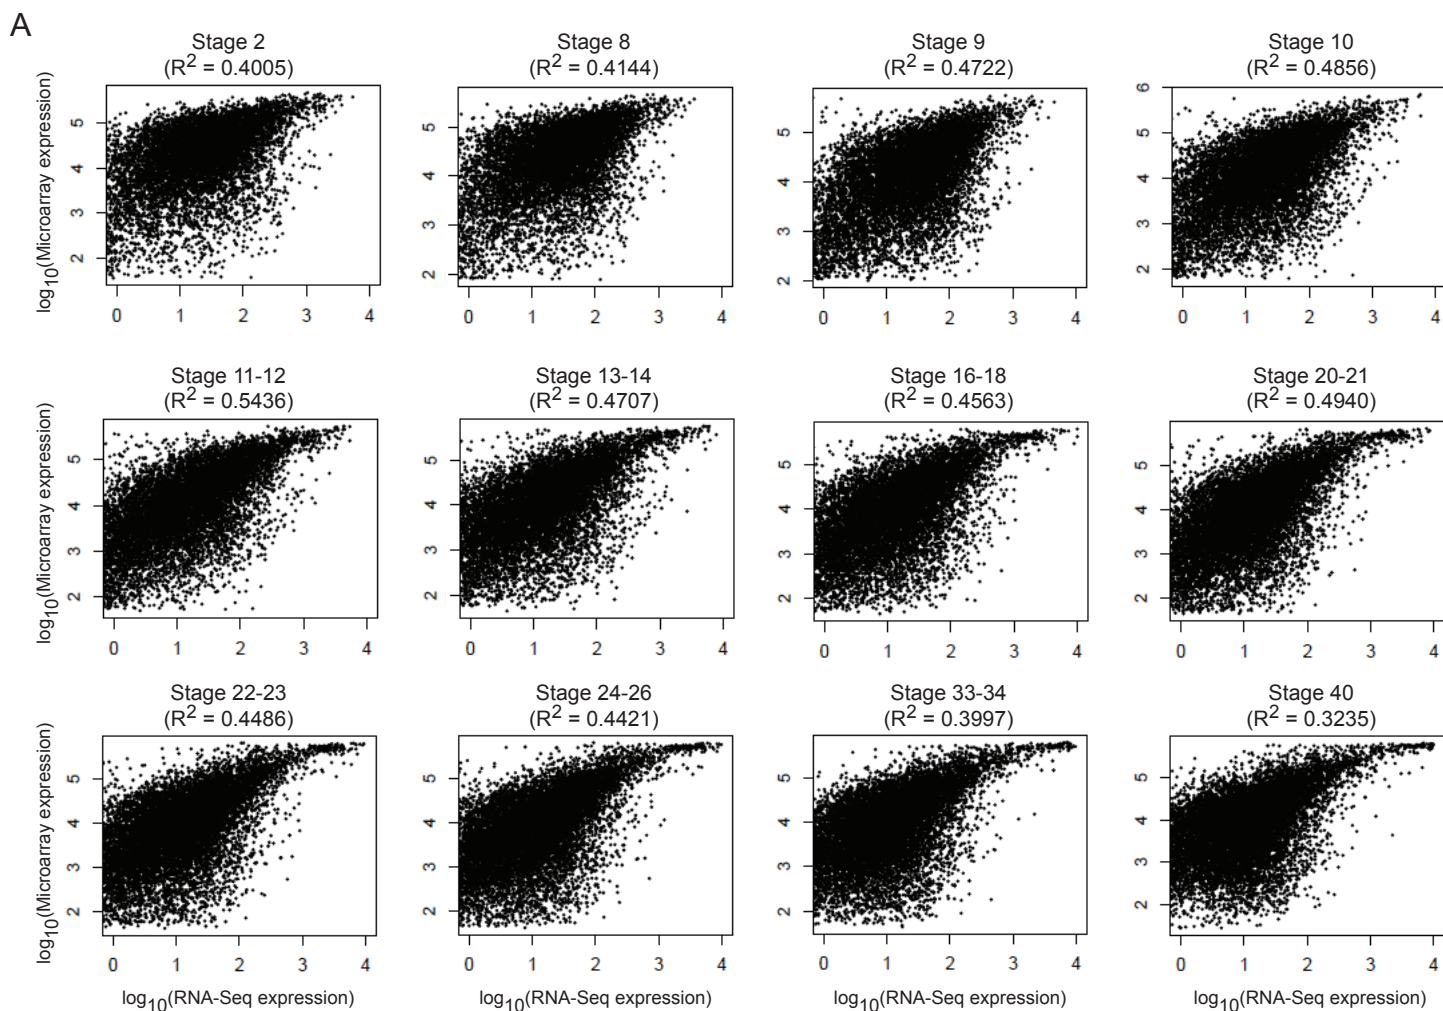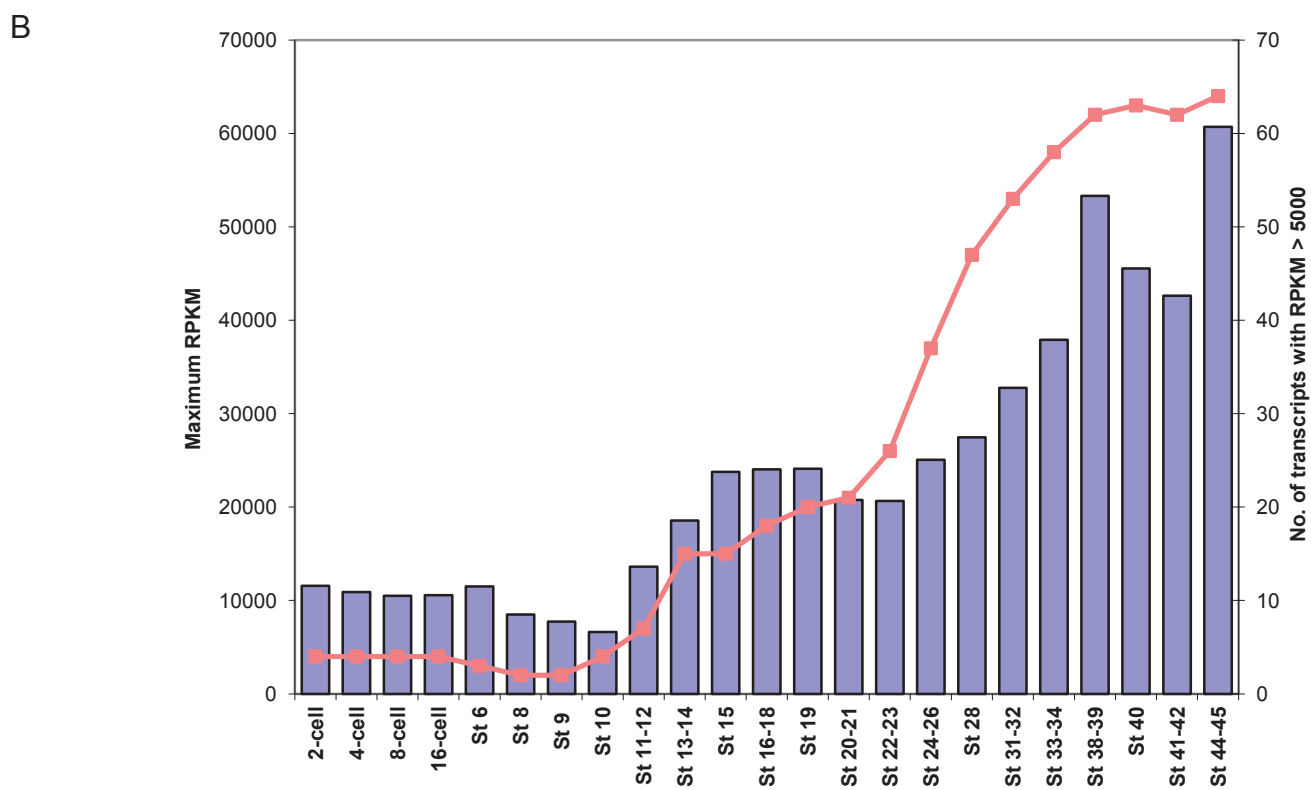

Figure S3

Supplement: GENOME_2012_141424.zip [file Figure S3 v3 - Comparison with microarray.pdf › Figure S3 v3 - Comparison with microarray.pdf]

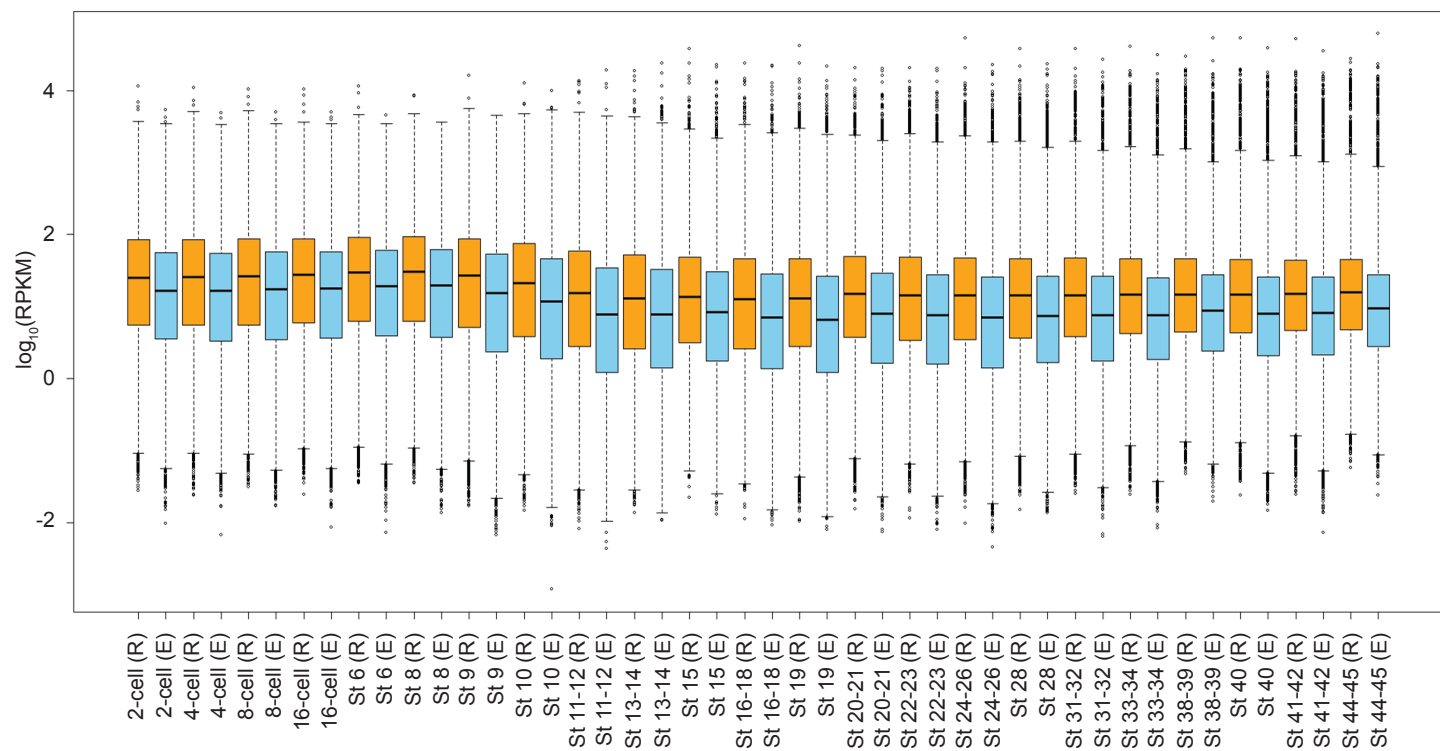

Figure S4

Supplement: GENOME_2012_141424.zip [file Figure S4 - Distribution of RPKMs.pdf › Figure S4 - Distribution of RPKMs.pdf]

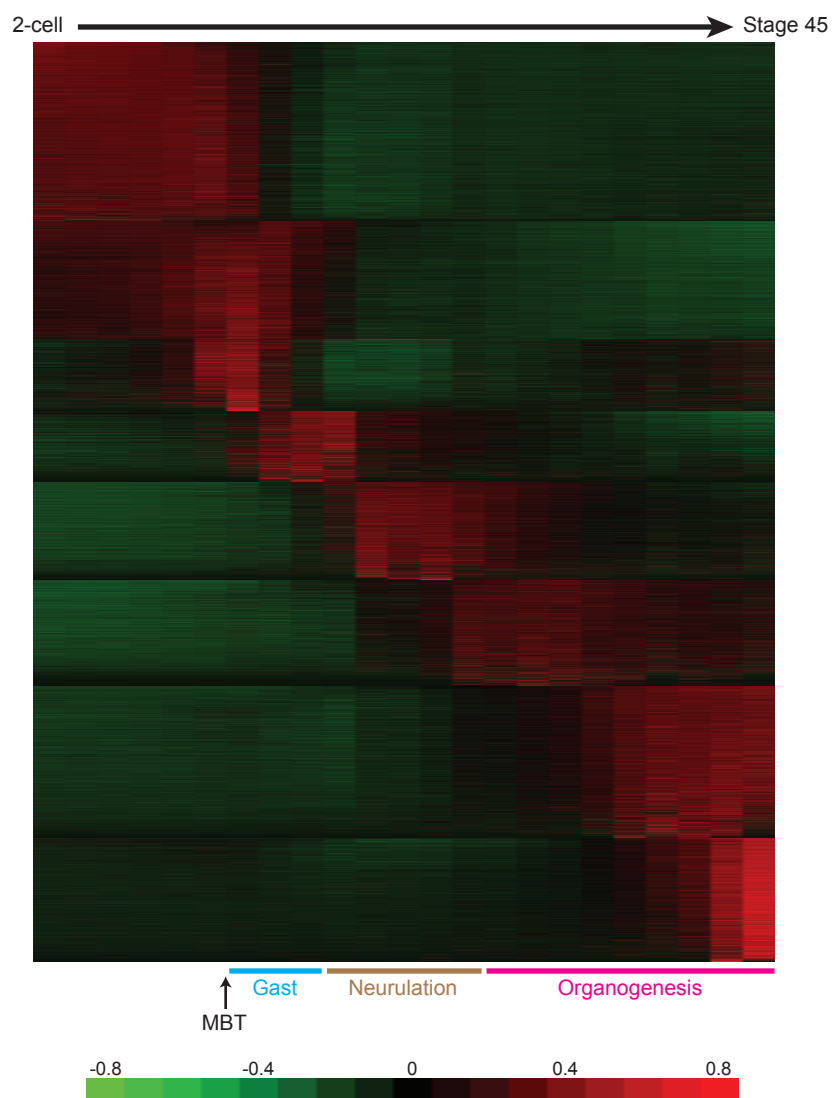

Figure S5

Supplement: GENOME_2012_141424.zip [file Figure S5 v2 - Ensembl Clustering.pdf › Figure S5 v2 - Ensembl Clustering.pdf]

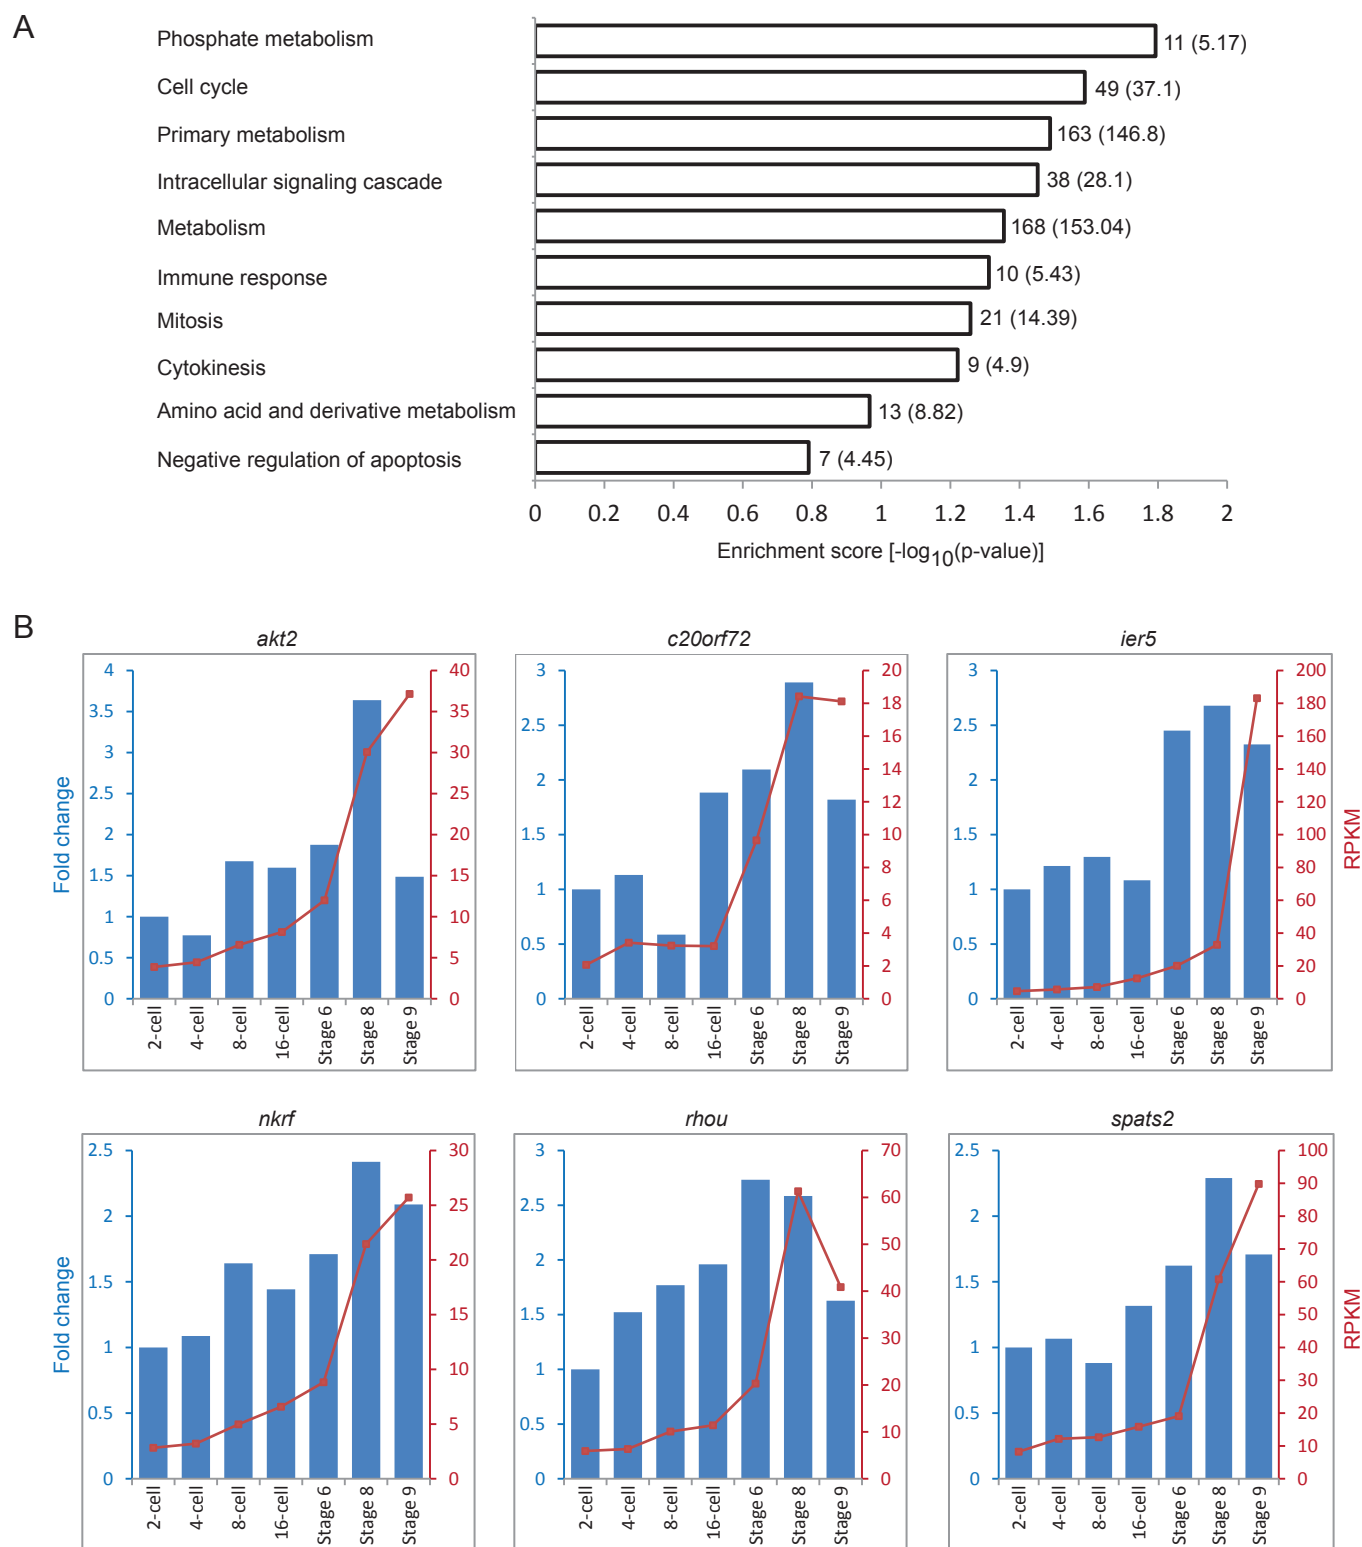

Figure S6

Supplement: GENOME_2012_141424.zip [file Figure S6 v3 - Additional pre-MBT validations.pdf › Figure S6 v3 - Additional pre-MBT validations.pdf]

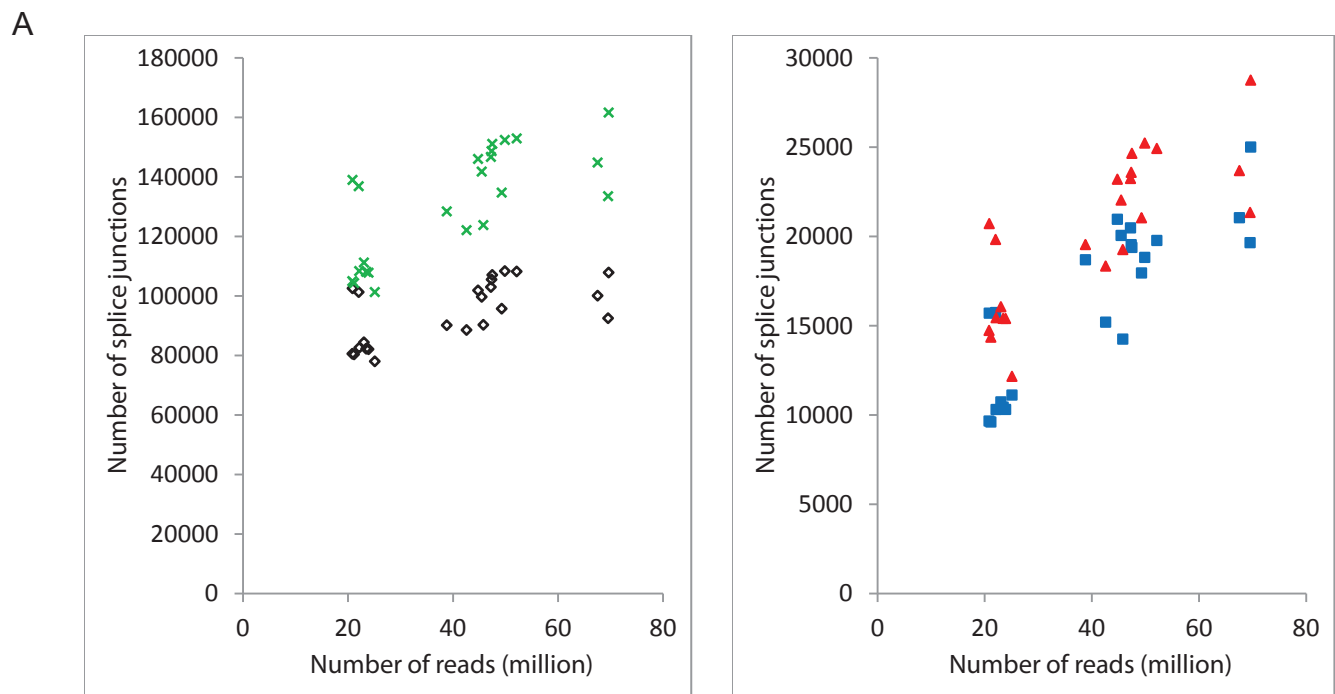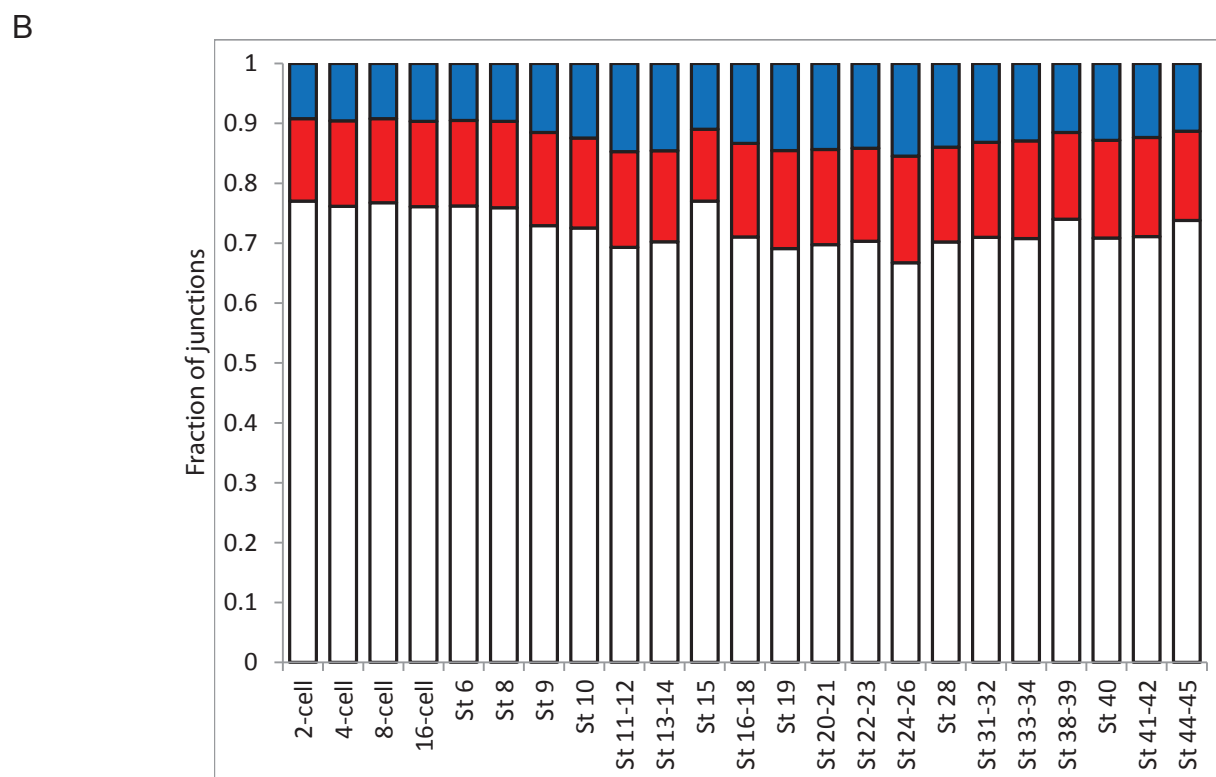

Figure S7

Supplement: GENOME_2012_141424.zip [file Figure S7 v3 - Splicing analysis.pdf › Figure S7 v3 - Splicing analysis.pdf]

A

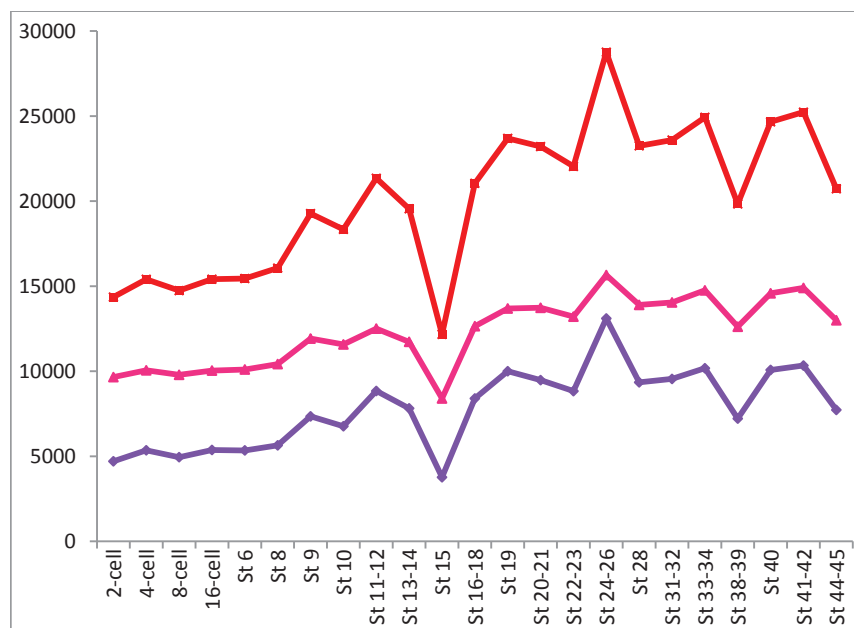

B

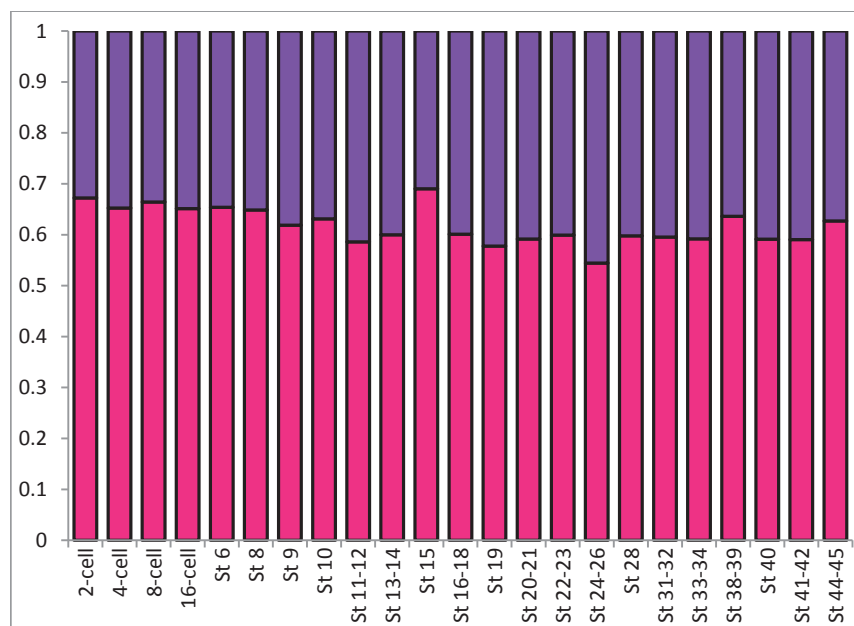

Figure S8

Supplement: GENOME_2012_141424.zip [file Figure S8 - Splicing EST.pdf › Figure S8 - Splicing EST.pdf]

A

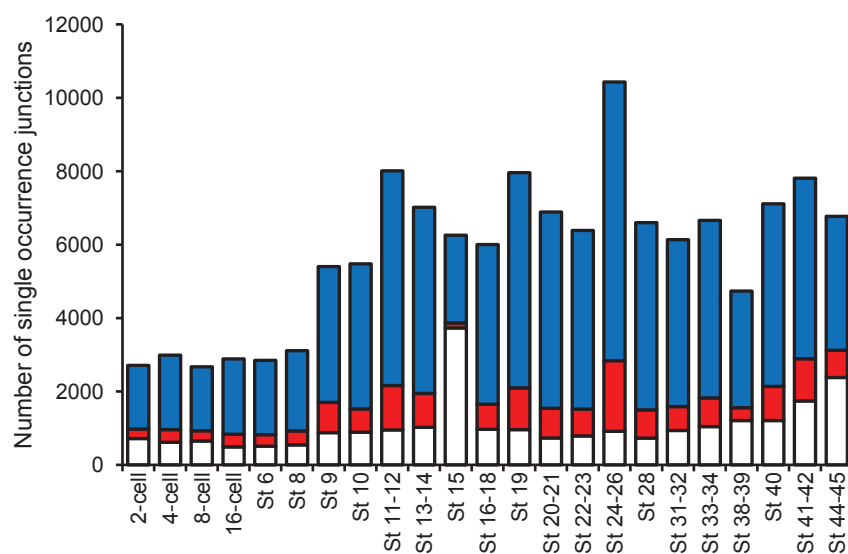

B

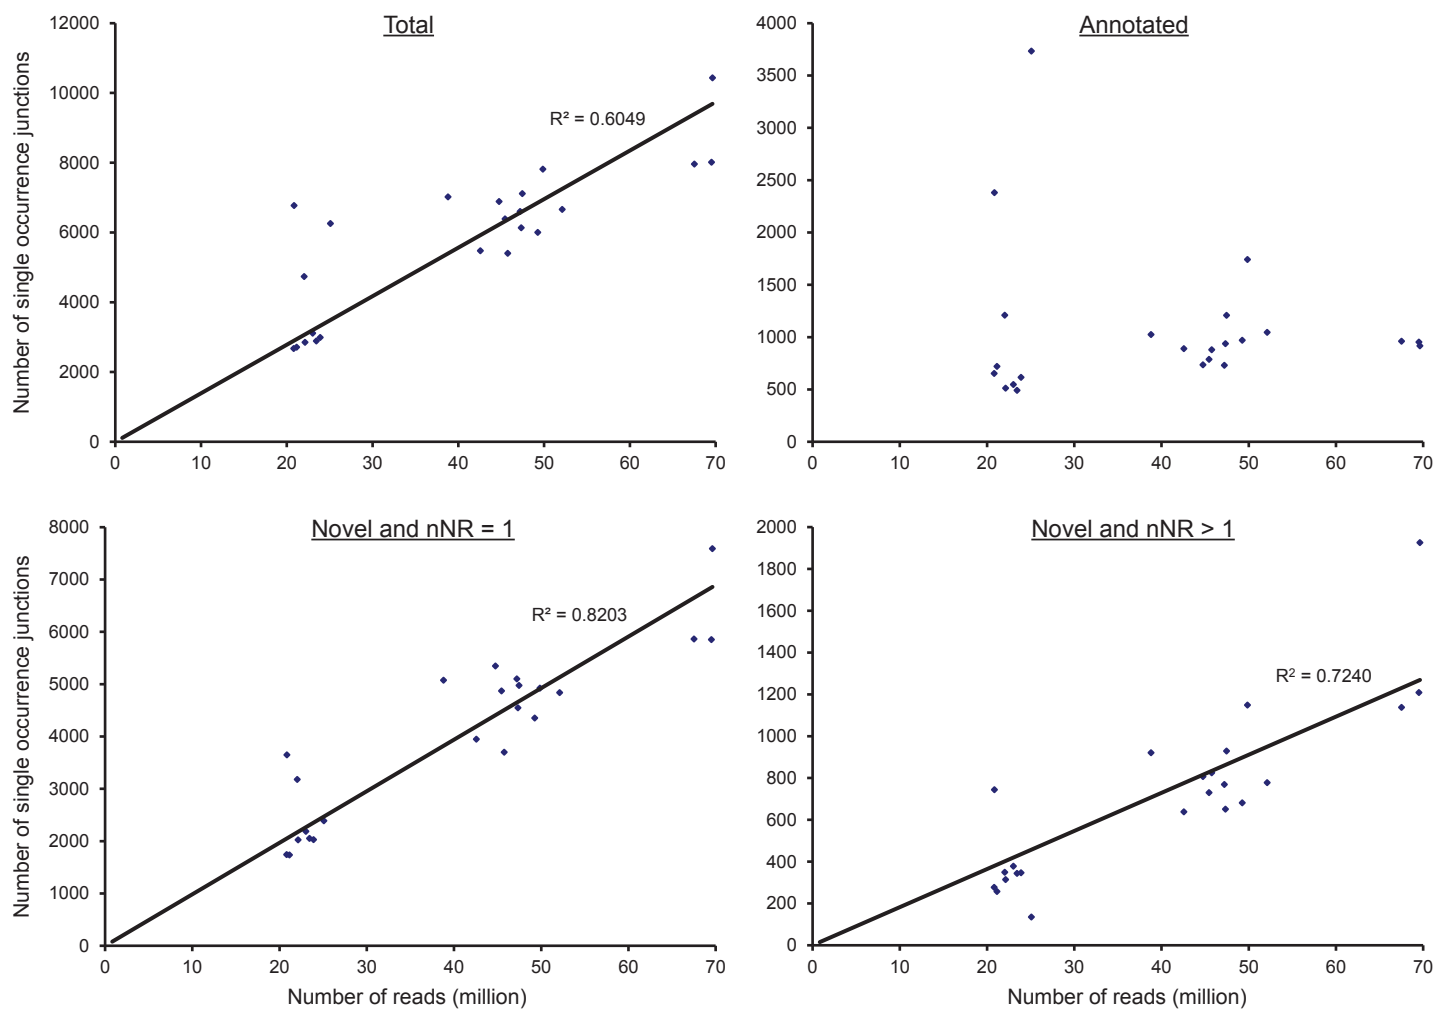

Figure S9

Supplement: GENOME_2012_141424.zip [file Figure S9 v2 - Single occurrence splice junctions.pdf › Figure S9 v2 - Single occurrence splice junctions.pdf]
